# Supplementary material for: Cis -acting variation is common across regulatory layers but is often buffered during embryonic development
Source: HighWire-hosted journal article supplement (doi:10.1101/gr.266338.120), 2020-12-11
Supplement: SupplementalTables.zip [file Supplemental_Table_S1.xlsx]

## Sheet: README
Supplemental Table S1: Evolutionary rates in non-coding features. phyloP (first tab): Average phyloP values measuring departure from a neutral evolutionary model for each non-coding features. maf_summary (second tab): Average minor allele frequency (maf) for each category of non-coding features, including a proximal and distal split for ATAC-seq and H3K27ac peaks.

## Sheet: phyloP
peak	phyloP	feature_type
peak_1	-0.186224	ATAC.distal
peak_8	0.999051	ATAC.distal
peak_9	0.182836	ATAC.distal
peak_11	1.0424	ATAC.distal
peak_12	0.870969	ATAC.distal
peak_13	0.886646	ATAC.distal
peak_14	0.700019	ATAC.distal
peak_15	0.458207	ATAC.distal
peak_16	0.359499	ATAC.distal
peak_17	0.438019	ATAC.distal
peak_18	0.41322	ATAC.distal
peak_19	0.663902	ATAC.distal
peak_20	0.605224	ATAC.distal
peak_21	0.618378	ATAC.distal
peak_24	0.292578	ATAC.distal
peak_29	-0.0838596	ATAC.distal
peak_30	0.567659	ATAC.distal
peak_31	0.403325	ATAC.distal
peak_32	0.513391	ATAC.distal
peak_33	0.643455	ATAC.distal
peak_35	0.525664	ATAC.distal
peak_36	0.518078	ATAC.distal
peak_39	1.19528	ATAC.distal
peak_43	0.865056	ATAC.distal
peak_44	1.37664	ATAC.distal
peak_46	1.01764	ATAC.distal
peak_50	1.15255	ATAC.distal
peak_51	0.538136	ATAC.distal
peak_52	0.464753	ATAC.distal
peak_58	0.42751	ATAC.distal
peak_59	-0.178586	ATAC.distal
peak_60	0.75003	ATAC.distal
peak_64	0.750447	ATAC.distal
peak_66	0.776811	ATAC.distal
peak_68	0.798133	ATAC.distal
peak_69	0.94911	ATAC.distal
peak_70	0.881114	ATAC.distal
peak_71	0.367923	ATAC.distal
peak_72	0.751223	ATAC.distal
peak_73	0.472858	ATAC.distal
peak_74	0.375958	ATAC.distal
peak_75	0.293855	ATAC.distal
peak_76	0.197195	ATAC.distal
peak_77	0.239347	ATAC.distal
peak_78	0.643663	ATAC.distal
peak_79	0.534306	ATAC.distal
peak_81	0.767577	ATAC.distal
peak_82	1.03598	ATAC.distal
peak_83	0.892784	ATAC.distal
peak_87	0.827192	ATAC.distal
peak_88	0.898686	ATAC.distal
peak_89	1.26697	ATAC.distal
peak_90	1.18488	ATAC.distal
peak_96	0.523346	ATAC.distal
peak_98	0.915895	ATAC.distal
peak_99	0.88789	ATAC.distal
peak_100	1.14977	ATAC.distal
peak_102	0.839849	ATAC.distal
peak_106	0.865282	ATAC.distal
peak_108	0.605679	ATAC.distal
peak_114	0.624083	ATAC.distal
peak_115	1.23836	ATAC.distal
peak_122	0.644631	ATAC.distal
peak_123	0.57389	ATAC.distal
peak_124	0.444304	ATAC.distal
peak_125	0.778703	ATAC.distal
peak_126	0.20121	ATAC.distal
peak_127	1.16019	ATAC.distal
peak_128	0.728959	ATAC.distal
peak_129	0.135819	ATAC.distal
peak_130	0.0420434	ATAC.distal
peak_131	0.73953	ATAC.distal
peak_134	1.26525	ATAC.distal
peak_135	0.748776	ATAC.distal
peak_136	0.613415	ATAC.distal
peak_137	0.941062	ATAC.distal
peak_138	1.02246	ATAC.distal
peak_139	0.591057	ATAC.distal
peak_140	0.92085	ATAC.distal
peak_141	-0.171328	ATAC.distal
peak_143	0.962867	ATAC.distal
peak_144	0.82408	ATAC.distal
peak_145	0.811219	ATAC.distal
peak_146	0.916855	ATAC.distal
peak_147	0.992702	ATAC.distal
peak_148	0.646536	ATAC.distal
peak_149	0.902834	ATAC.distal
peak_150	0.894696	ATAC.distal
peak_151	1.00526	ATAC.distal
peak_154	1.22864	ATAC.distal
peak_155	0.927079	ATAC.distal
peak_156	1.39757	ATAC.distal
peak_157	1.23997	ATAC.distal
peak_159	1.48562	ATAC.distal
peak_160	0.667474	ATAC.distal
peak_165	0.681109	ATAC.distal
peak_170	0.54634	ATAC.distal
peak_171	0.853442	ATAC.distal
peak_173	1.10231	ATAC.distal
peak_174	0.806149	ATAC.distal
peak_175	0.821392	ATAC.distal
peak_176	0.738038	ATAC.distal
peak_177	0.687219	ATAC.distal
peak_181	0.452886	ATAC.distal
peak_184	0.897014	ATAC.distal
peak_187	0.511149	ATAC.distal
peak_188	0.401967	ATAC.distal
peak_189	0.363512	ATAC.distal
peak_190	0.437229	ATAC.distal
peak_191	0.649484	ATAC.distal
peak_192	0.547654	ATAC.distal
peak_193	0.54203	ATAC.distal
peak_194	1.29516	ATAC.distal
peak_196	0.631884	ATAC.distal
peak_197	0.657212	ATAC.distal
peak_198	0.613284	ATAC.distal
peak_199	0.770082	ATAC.distal
peak_200	0.823109	ATAC.distal
peak_201	0.708548	ATAC.distal
peak_202	0.877888	ATAC.distal
peak_203	0.447373	ATAC.distal
peak_204	0.572057	ATAC.distal
peak_205	0.461875	ATAC.distal
peak_206	0.785092	ATAC.distal
peak_207	0.605001	ATAC.distal
peak_208	0.661971	ATAC.distal
peak_209	0.94842	ATAC.distal
peak_213	0.119323	ATAC.distal
peak_214	1.18078	ATAC.distal
peak_215	0.529575	ATAC.distal
peak_216	0.910263	ATAC.distal
peak_217	0.449595	ATAC.distal
peak_218	0.742457	ATAC.distal
peak_220	0.943344	ATAC.distal
peak_221	0.607	ATAC.distal
peak_227	0.93985	ATAC.distal
peak_232	0.291091	ATAC.distal
peak_233	0.129697	ATAC.distal
peak_234	0.68876	ATAC.distal
peak_235	0.248361	ATAC.distal
peak_236	0.736318	ATAC.distal
peak_237	0.899669	ATAC.distal
peak_239	0.657434	ATAC.distal
peak_240	0.774755	ATAC.distal
peak_241	0.720038	ATAC.distal
peak_242	0.731021	ATAC.distal
peak_244	0.628458	ATAC.distal
peak_247	0.642042	ATAC.distal
peak_248	0.106359	ATAC.distal
peak_249	0.872444	ATAC.distal
peak_250	0.641688	ATAC.distal
peak_251	0.861276	ATAC.distal
peak_252	1.04992	ATAC.distal
peak_253	1.18718	ATAC.distal
peak_254	0.474071	ATAC.distal
peak_255	0.681633	ATAC.distal
peak_256	0.635499	ATAC.distal
peak_257	0.902175	ATAC.distal
peak_258	0.725863	ATAC.distal
peak_259	0.851732	ATAC.distal
peak_260	0.85412	ATAC.distal
peak_261	0.828563	ATAC.distal
peak_262	0.679985	ATAC.distal
peak_263	0.746388	ATAC.distal
peak_264	0.749663	ATAC.distal
peak_265	-0.0981579	ATAC.distal
peak_268	0.822994	ATAC.distal
peak_269	1.18905	ATAC.distal
peak_270	0.801927	ATAC.distal
peak_271	0.735111	ATAC.distal
peak_272	0.311092	ATAC.distal
peak_276	0.975439	ATAC.distal
peak_277	0.997635	ATAC.distal
peak_278	0.767733	ATAC.distal
peak_283	1.21021	ATAC.distal
peak_284	1.11444	ATAC.distal
peak_286	0.440505	ATAC.distal
peak_287	0.938433	ATAC.distal
peak_288	0.4038	ATAC.distal
peak_289	0.364695	ATAC.distal
peak_290	0.34106	ATAC.distal
peak_291	0.392234	ATAC.distal
peak_292	0.431238	ATAC.distal
peak_293	0.354884	ATAC.distal
peak_294	0.547857	ATAC.distal
peak_295	0.377959	ATAC.distal
peak_304	0.959786	ATAC.distal
peak_307	0.647752	ATAC.distal
peak_308	0.307281	ATAC.distal
peak_309	1.59433	ATAC.distal
peak_313	1.00475	ATAC.distal
peak_315	1.14354	ATAC.distal
peak_316	0.600613	ATAC.distal
peak_317	0.591405	ATAC.distal
peak_318	0.926932	ATAC.distal
peak_320	0.443094	ATAC.distal
peak_321	0.288048	ATAC.distal
peak_322	0.753317	ATAC.distal
peak_324	0.476888	ATAC.distal
peak_325	0.670424	ATAC.distal
peak_327	0.781343	ATAC.distal
peak_328	0.856221	ATAC.distal
peak_329	0.556256	ATAC.distal
peak_330	0.825716	ATAC.distal
peak_331	1.01637	ATAC.distal
peak_332	0.895049	ATAC.distal
peak_333	0.487436	ATAC.distal
peak_334	0.719447	ATAC.distal
peak_335	0.893854	ATAC.distal
peak_336	0.641	ATAC.distal
peak_337	0.619431	ATAC.distal
peak_340	0.673962	ATAC.distal
peak_341	0.865549	ATAC.distal
peak_342	1.00746	ATAC.distal
peak_344	0.837089	ATAC.distal
peak_345	0.73097	ATAC.distal
peak_346	0.636798	ATAC.distal
peak_347	0.513367	ATAC.distal
peak_348	0.752008	ATAC.distal
peak_349	0.478843	ATAC.distal
peak_354	0.499563	ATAC.distal
peak_355	1.06008	ATAC.distal
peak_357	0.571022	ATAC.distal
peak_358	0.650122	ATAC.distal
peak_359	0.339632	ATAC.distal
peak_360	0.561426	ATAC.distal
peak_361	0.507502	ATAC.distal
peak_364	0.581329	ATAC.distal
peak_365	0.51698	ATAC.distal
peak_367	0.242507	ATAC.distal
peak_369	1.2063	ATAC.distal
peak_387	0.838671	ATAC.distal
peak_388	0.86156	ATAC.distal
peak_392	0.786327	ATAC.distal
peak_393	1.06941	ATAC.distal
peak_394	0.831921	ATAC.distal
peak_395	0.706583	ATAC.distal
peak_396	1.0157	ATAC.distal
peak_397	1.05629	ATAC.distal
peak_398	1.03276	ATAC.distal
peak_399	0.927458	ATAC.distal
peak_400	0.864213	ATAC.distal
peak_403	0.976581	ATAC.distal
peak_404	1.02975	ATAC.distal
peak_405	0.959792	ATAC.distal
peak_406	0.709226	ATAC.distal
peak_407	0.87196	ATAC.distal
peak_408	1.17171	ATAC.distal
peak_409	0.845711	ATAC.distal
peak_410	0.906155	ATAC.distal
peak_411	0.929765	ATAC.distal
peak_412	1.14838	ATAC.distal
peak_413	1.10203	ATAC.distal
peak_414	0.715486	ATAC.distal
peak_415	0.764481	ATAC.distal
peak_416	0.824753	ATAC.distal
peak_417	0.667554	ATAC.distal
peak_418	0.931391	ATAC.distal
peak_419	0.925929	ATAC.distal
peak_424	0.426691	ATAC.distal
peak_425	0.92504	ATAC.distal
peak_426	0.633665	ATAC.distal
peak_427	0.998476	ATAC.distal
peak_428	0.811754	ATAC.distal
peak_430	0.790684	ATAC.distal
peak_432	0.967123	ATAC.distal
peak_433	0.853192	ATAC.distal
peak_434	0.816613	ATAC.distal
peak_435	0.471865	ATAC.distal
peak_436	0.638401	ATAC.distal
peak_437	0.740309	ATAC.distal
peak_438	0.824376	ATAC.distal
peak_439	0.87315	ATAC.distal
peak_440	1.03002	ATAC.distal
peak_441	0.926338	ATAC.distal
peak_442	0.705885	ATAC.distal
peak_443	1.01775	ATAC.distal
peak_444	0.850846	ATAC.distal
peak_445	1.06496	ATAC.distal
peak_446	0.636312	ATAC.distal
peak_449	0.864576	ATAC.distal
peak_450	0.695935	ATAC.distal
peak_451	0.852062	ATAC.distal
peak_454	0.72222	ATAC.distal
peak_455	0.583549	ATAC.distal
peak_456	0.789967	ATAC.distal
peak_457	0.94264	ATAC.distal
peak_458	-0.0140797	ATAC.distal
peak_459	0.740167	ATAC.distal
peak_461	0.726794	ATAC.distal
peak_462	0.746744	ATAC.distal
peak_463	1.07936	ATAC.distal
peak_464	0.663191	ATAC.distal
peak_465	0.916129	ATAC.distal
peak_466	0.686082	ATAC.distal
peak_467	0.628453	ATAC.distal
peak_468	0.646862	ATAC.distal
peak_469	0.296696	ATAC.distal
peak_470	1.00138	ATAC.distal
peak_471	0.779185	ATAC.distal
peak_472	0.454805	ATAC.distal
peak_473	0.785885	ATAC.distal
peak_474	0.777856	ATAC.distal
peak_475	0.647657	ATAC.distal
peak_476	0.587939	ATAC.distal
peak_477	0.796204	ATAC.distal
peak_478	0.762377	ATAC.distal
peak_479	0.678684	ATAC.distal
peak_480	0.74695	ATAC.distal
peak_481	0.663918	ATAC.distal
peak_482	0.956914	ATAC.distal
peak_484	0.263303	ATAC.distal
peak_487	1.2775	ATAC.distal
peak_488	0.804154	ATAC.distal
peak_489	0.321738	ATAC.distal
peak_490	0.676184	ATAC.distal
peak_491	0.562031	ATAC.distal
peak_492	0.746917	ATAC.distal
peak_495	0.502136	ATAC.distal
peak_499	0.66714	ATAC.distal
peak_500	0.505302	ATAC.distal
peak_501	0.510102	ATAC.distal
peak_502	0.611584	ATAC.distal
peak_503	0.820923	ATAC.distal
peak_504	0.897513	ATAC.distal
peak_505	0.711237	ATAC.distal
peak_506	0.545301	ATAC.distal
peak_507	0.580348	ATAC.distal
peak_508	0.618002	ATAC.distal
peak_509	0.584174	ATAC.distal
peak_510	0.757261	ATAC.distal
peak_511	0.54232	ATAC.distal
peak_512	1.01516	ATAC.distal
peak_513	0.878396	ATAC.distal
peak_515	1.05987	ATAC.distal
peak_517	0.685053	ATAC.distal
peak_518	0.945765	ATAC.distal
peak_519	0.537636	ATAC.distal
peak_520	0.454934	ATAC.distal
peak_521	0.595335	ATAC.distal
peak_522	0.801932	ATAC.distal
peak_523	0.947938	ATAC.distal
peak_524	0.808243	ATAC.distal
peak_526	0.851427	ATAC.distal
peak_527	0.272171	ATAC.distal
peak_528	0.497635	ATAC.distal
peak_529	0.665285	ATAC.distal
peak_530	0.774498	ATAC.distal
peak_531	0.584267	ATAC.distal
peak_532	0.663398	ATAC.distal
peak_533	0.196658	ATAC.distal
peak_534	0.707503	ATAC.distal
peak_535	0.548338	ATAC.distal
peak_537	0.491332	ATAC.distal
peak_538	0.766126	ATAC.distal
peak_539	0.315168	ATAC.distal
peak_541	0.92121	ATAC.distal
peak_542	0.534479	ATAC.distal
peak_543	0.770726	ATAC.distal
peak_544	0.822154	ATAC.distal
peak_545	0.649969	ATAC.distal
peak_546	0.741701	ATAC.distal
peak_547	0.745303	ATAC.distal
peak_549	0.79095	ATAC.distal
peak_550	0.591095	ATAC.distal
peak_551	0.868782	ATAC.distal
peak_552	0.432519	ATAC.distal
peak_553	0.857229	ATAC.distal
peak_554	0.811194	ATAC.distal
peak_555	0.654731	ATAC.distal
peak_556	0.872392	ATAC.distal
peak_557	0.638965	ATAC.distal
peak_558	0.784483	ATAC.distal
peak_559	0.997279	ATAC.distal
peak_560	0.794315	ATAC.distal
peak_562	1.03364	ATAC.distal
peak_563	0.698563	ATAC.distal
peak_566	0.458064	ATAC.distal
peak_567	0.49964	ATAC.distal
peak_572	0.509757	ATAC.distal
peak_573	0.313467	ATAC.distal
peak_576	0.463837	ATAC.distal
peak_577	0.469244	ATAC.distal
peak_578	0.935724	ATAC.distal
peak_579	0.354054	ATAC.distal
peak_580	0.298313	ATAC.distal
peak_581	0.553323	ATAC.distal
peak_582	0.64546	ATAC.distal
peak_583	1.05293	ATAC.distal
peak_584	0.633147	ATAC.distal
peak_585	1.1469	ATAC.distal
peak_588	0.574377	ATAC.distal
peak_590	0.590384	ATAC.distal
peak_591	0.632988	ATAC.distal
peak_592	0.650174	ATAC.distal
peak_593	0.575967	ATAC.distal
peak_594	0.271606	ATAC.distal
peak_596	0.678534	ATAC.distal
peak_597	0.718287	ATAC.distal
peak_598	0.854107	ATAC.distal
peak_599	0.693456	ATAC.distal
peak_601	0.0963156	ATAC.distal
peak_604	0.501305	ATAC.distal
peak_605	0.441786	ATAC.distal
peak_606	0.456611	ATAC.distal
peak_607	0.758236	ATAC.distal
peak_608	0.197807	ATAC.distal
peak_609	0.466094	ATAC.distal
peak_610	0.552589	ATAC.distal
peak_611	0.501142	ATAC.distal
peak_613	1.07311	ATAC.distal
peak_614	0.571997	ATAC.distal
peak_615	0.725848	ATAC.distal
peak_616	0.610341	ATAC.distal
peak_617	0.652068	ATAC.distal
peak_618	0.651215	ATAC.distal
peak_619	1.11324	ATAC.distal
peak_624	0.936493	ATAC.distal
peak_627	0.866954	ATAC.distal
peak_628	0.823488	ATAC.distal
peak_629	0.681949	ATAC.distal
peak_630	0.671569	ATAC.distal
peak_631	0.839271	ATAC.distal
peak_633	0.77782	ATAC.distal
peak_636	0.422121	ATAC.distal
peak_638	0.736819	ATAC.distal
peak_639	0.952484	ATAC.distal
peak_641	1.02003	ATAC.distal
peak_649	0.418637	ATAC.distal
peak_651	1.52087	ATAC.distal
peak_657	0.715954	ATAC.distal
peak_659	0.671209	ATAC.distal
peak_660	0.479601	ATAC.distal
peak_666	0.785175	ATAC.distal
peak_667	0.650119	ATAC.distal
peak_668	0.594022	ATAC.distal
peak_669	0.541725	ATAC.distal
peak_670	0.481875	ATAC.distal
peak_681	0.44159	ATAC.distal
peak_682	0.843043	ATAC.distal
peak_684	0.612574	ATAC.distal
peak_685	0.579714	ATAC.distal
peak_686	0.45661	ATAC.distal
peak_696	1.34907	ATAC.distal
peak_697	1.40787	ATAC.distal
peak_704	0.814771	ATAC.distal
peak_705	0.552276	ATAC.distal
peak_709	0.900417	ATAC.distal
peak_710	0.861672	ATAC.distal
peak_712	1.05093	ATAC.distal
peak_718	0.534919	ATAC.distal
peak_719	0.880663	ATAC.distal
peak_720	0.876615	ATAC.distal
peak_722	1.00141	ATAC.distal
peak_723	0.746186	ATAC.distal
peak_725	0.886195	ATAC.distal
peak_726	0.899248	ATAC.distal
peak_727	0.735915	ATAC.distal
peak_728	1.23989	ATAC.distal
peak_733	0.751746	ATAC.distal
peak_734	1.0262	ATAC.distal
peak_735	1.01441	ATAC.distal
peak_736	0.81242	ATAC.distal
peak_737	0.939353	ATAC.distal
peak_738	1.04494	ATAC.distal
peak_739	0.782655	ATAC.distal
peak_743	1.00979	ATAC.distal
peak_744	1.29049	ATAC.distal
peak_746	1.22227	ATAC.distal
peak_747	1.14795	ATAC.distal
peak_748	0.636241	ATAC.distal
peak_749	1.02799	ATAC.distal
peak_750	0.976451	ATAC.distal
peak_751	1.42262	ATAC.distal
peak_754	0.625313	ATAC.distal
peak_755	1.06325	ATAC.distal
peak_756	0.925064	ATAC.distal
peak_757	0.78716	ATAC.distal
peak_758	0.71176	ATAC.distal
peak_761	0.047021	ATAC.distal
peak_762	0.460183	ATAC.distal
peak_763	0.875106	ATAC.distal
peak_764	0.936232	ATAC.distal
peak_765	0.755909	ATAC.distal
peak_766	0.66295	ATAC.distal
peak_768	0.88046	ATAC.distal
peak_770	0.578577	ATAC.distal
peak_771	0.926437	ATAC.distal
peak_772	0.834227	ATAC.distal
peak_774	0.319265	ATAC.distal
peak_775	0.383888	ATAC.distal
peak_776	0.271559	ATAC.distal
peak_779	0.393993	ATAC.distal
peak_780	0.631816	ATAC.distal
peak_783	1.10709	ATAC.distal
peak_793	0.810295	ATAC.distal
peak_794	1.34992	ATAC.distal
peak_798	0.557751	ATAC.distal
peak_800	0.476788	ATAC.distal
peak_802	0.530764	ATAC.distal
peak_805	0.679934	ATAC.distal
peak_806	0.903023	ATAC.distal
peak_809	0.706102	ATAC.distal
peak_813	0.384473	ATAC.distal
peak_814	0.299712	ATAC.distal
peak_817	0.233042	ATAC.distal
peak_818	0.523284	ATAC.distal
peak_819	0.338455	ATAC.distal
peak_820	1.15264	ATAC.distal
peak_825	1.13391	ATAC.distal
peak_826	0.941643	ATAC.distal
peak_827	1.41992	ATAC.distal
peak_830	0.631855	ATAC.distal
peak_831	0.527172	ATAC.distal
peak_832	0.356494	ATAC.distal
peak_833	0.409697	ATAC.distal
peak_834	0.566799	ATAC.distal
peak_835	0.469363	ATAC.distal
peak_836	0.394948	ATAC.distal
peak_837	0.690398	ATAC.distal
peak_838	0.577437	ATAC.distal
peak_839	0.451088	ATAC.distal
peak_840	0.322934	ATAC.distal
peak_841	0.5128	ATAC.distal
peak_842	0.730985	ATAC.distal
peak_843	0.463171	ATAC.distal
peak_844	0.55771	ATAC.distal
peak_845	0.153469	ATAC.distal
peak_846	0.633476	ATAC.distal
peak_847	0.399045	ATAC.distal
peak_848	0.547233	ATAC.distal
peak_849	0.621976	ATAC.distal
peak_850	0.605091	ATAC.distal
peak_851	0.482306	ATAC.distal
peak_852	0.7743	ATAC.distal
peak_853	0.627217	ATAC.distal
peak_856	0.662603	ATAC.distal
peak_859	0.752795	ATAC.distal
peak_860	1.17412	ATAC.distal
peak_861	1.09859	ATAC.distal
peak_863	0.215772	ATAC.distal
peak_867	1.02764	ATAC.distal
peak_871	0.646528	ATAC.distal
peak_872	0.508552	ATAC.distal
peak_873	0.698786	ATAC.distal
peak_874	0.730597	ATAC.distal
peak_875	0.811748	ATAC.distal
peak_876	0.339399	ATAC.distal
peak_880	0.948916	ATAC.distal
peak_885	0.358566	ATAC.distal
peak_890	0.580194	ATAC.distal
peak_892	0.693183	ATAC.distal
peak_893	0.688464	ATAC.distal
peak_894	0.565452	ATAC.distal
peak_895	0.753933	ATAC.distal
peak_896	0.959256	ATAC.distal
peak_897	0.373961	ATAC.distal
peak_898	0.755937	ATAC.distal
peak_899	0.658895	ATAC.distal
peak_900	0.582982	ATAC.distal
peak_903	0.629996	ATAC.distal
peak_904	0.597939	ATAC.distal
peak_905	0.642098	ATAC.distal
peak_908	0.858446	ATAC.distal
peak_909	0.512048	ATAC.distal
peak_910	0.433435	ATAC.distal
peak_911	0.779408	ATAC.distal
peak_913	0.59954	ATAC.distal
peak_914	0.702597	ATAC.distal
peak_918	1.17576	ATAC.distal
peak_919	1.51274	ATAC.distal
peak_920	1.06288	ATAC.distal
peak_925	0.35826	ATAC.distal
peak_926	1.13064	ATAC.distal
peak_927	0.887596	ATAC.distal
peak_932	0.116448	ATAC.distal
peak_934	0.958288	ATAC.distal
peak_935	0.42989	ATAC.distal
peak_939	0.343697	ATAC.distal
peak_943	0.642546	ATAC.distal
peak_944	0.331564	ATAC.distal
peak_945	0.702094	ATAC.distal
peak_946	0.669181	ATAC.distal
peak_947	0.391312	ATAC.distal
peak_951	0.560388	ATAC.distal
peak_952	0.788848	ATAC.distal
peak_954	0.392861	ATAC.distal
peak_958	0.429873	ATAC.distal
peak_959	0.45958	ATAC.distal
peak_962	0.577314	ATAC.distal
peak_963	0.617394	ATAC.distal
peak_964	0.425131	ATAC.distal
peak_965	0.449812	ATAC.distal
peak_966	0.389951	ATAC.distal
peak_967	0.528113	ATAC.distal
peak_968	0.222508	ATAC.distal
peak_970	1.16484	ATAC.distal
peak_973	1.33292	ATAC.distal
peak_976	0.623754	ATAC.distal
peak_979	1.14365	ATAC.distal
peak_981	0.443037	ATAC.distal
peak_983	0.606209	ATAC.distal
peak_985	0.813096	ATAC.distal
peak_986	0.435759	ATAC.distal
peak_987	0.795149	ATAC.distal
peak_988	0.395599	ATAC.distal
peak_989	0.228601	ATAC.distal
peak_994	0.591959	ATAC.distal
peak_995	0.644859	ATAC.distal
peak_996	0.661544	ATAC.distal
peak_997	1.08611	ATAC.distal
peak_1002	0.606112	ATAC.distal
peak_1003	0.0793204	ATAC.distal
peak_1004	0.808543	ATAC.distal
peak_1005	0.304166	ATAC.distal
peak_1006	0.634399	ATAC.distal
peak_1007	0.747741	ATAC.distal
peak_1008	0.80836	ATAC.distal
peak_1009	0.839425	ATAC.distal
peak_1011	1.07197	ATAC.distal
peak_1012	0.734692	ATAC.distal
peak_1013	0.731743	ATAC.distal
peak_1014	0.914779	ATAC.distal
peak_1015	0.774055	ATAC.distal
peak_1016	0.576662	ATAC.distal
peak_1018	0.832801	ATAC.distal
peak_1023	0.641656	ATAC.distal
peak_1024	0.637485	ATAC.distal
peak_1027	1.22016	ATAC.distal
peak_1028	0.860007	ATAC.distal
peak_1029	0.740229	ATAC.distal
peak_1033	0.712802	ATAC.distal
peak_1034	0.87921	ATAC.distal
peak_1035	0.544628	ATAC.distal
peak_1039	0.280554	ATAC.distal
peak_1040	0.64264	ATAC.distal
peak_1041	0.326596	ATAC.distal
peak_1043	0.654778	ATAC.distal
peak_1044	0.909228	ATAC.distal
peak_1045	0.831839	ATAC.distal
peak_1046	0.794696	ATAC.distal
peak_1047	0.215458	ATAC.distal
peak_1051	0.632012	ATAC.distal
peak_1052	0.926743	ATAC.distal
peak_1053	1.21532	ATAC.distal
peak_1054	0.802406	ATAC.distal
peak_1055	0.818468	ATAC.distal
peak_1056	0.768251	ATAC.distal
peak_1057	0.955051	ATAC.distal
peak_1063	0.530565	ATAC.distal
peak_1064	1.17663	ATAC.distal
peak_1066	0.808659	ATAC.distal
peak_1067	0.22739	ATAC.distal
peak_1068	1.05127	ATAC.distal
peak_1069	0.612539	ATAC.distal
peak_1070	0.46165	ATAC.distal
peak_1072	0.708933	ATAC.distal
peak_1080	0.60506	ATAC.distal
peak_1081	0.665559	ATAC.distal
peak_1084	1.16317	ATAC.distal
peak_1085	0.813831	ATAC.distal
peak_1086	0.920572	ATAC.distal
peak_1091	1.24032	ATAC.distal
peak_1092	0.75761	ATAC.distal
peak_1093	1.28527	ATAC.distal
peak_1094	1.0508	ATAC.distal
peak_1097	0.779745	ATAC.distal
peak_1103	0.735818	ATAC.distal
peak_1107	1.09109	ATAC.distal
peak_1108	0.556565	ATAC.distal
peak_1109	0.720273	ATAC.distal
peak_1110	0.651566	ATAC.distal
peak_1113	0.686329	ATAC.distal
peak_1114	0.700369	ATAC.distal
peak_1115	0.98788	ATAC.distal
peak_1116	0.950417	ATAC.distal
peak_1117	0.743867	ATAC.distal
peak_1119	0.860243	ATAC.distal
peak_1120	0.703113	ATAC.distal
peak_1123	0.842172	ATAC.distal
peak_1125	1.09724	ATAC.distal
peak_1126	1.2298	ATAC.distal
peak_1133	0.525411	ATAC.distal
peak_1134	0.43509	ATAC.distal
peak_1136	0.654157	ATAC.distal
peak_1137	1.02163	ATAC.distal
peak_1140	1.24715	ATAC.distal
peak_1141	0.452471	ATAC.distal
peak_1142	1.07493	ATAC.distal
peak_1143	0.186673	ATAC.distal
peak_1144	0.554314	ATAC.distal
peak_1145	0.698861	ATAC.distal
peak_1146	0.519104	ATAC.distal
peak_1147	0.3982	ATAC.distal
peak_1148	0.205815	ATAC.distal
peak_1153	0.456694	ATAC.distal
peak_1154	0.611887	ATAC.distal
peak_1155	0.747305	ATAC.distal
peak_1156	0.619208	ATAC.distal
peak_1157	0.483611	ATAC.distal
peak_1159	0.43894	ATAC.distal
peak_1160	0.392031	ATAC.distal
peak_1161	1.14755	ATAC.distal
peak_1162	0.529339	ATAC.distal
peak_1163	0.573975	ATAC.distal
peak_1164	0.68268	ATAC.distal
peak_1165	0.479659	ATAC.distal
peak_1167	0.631154	ATAC.distal
peak_1168	1.05839	ATAC.distal
peak_1169	1.01789	ATAC.distal
peak_1171	0.4479	ATAC.distal
peak_1172	0.85198	ATAC.distal
peak_1173	1.09927	ATAC.distal
peak_1174	0.544432	ATAC.distal
peak_1175	0.735593	ATAC.distal
peak_1176	1.22882	ATAC.distal
peak_1177	0.602209	ATAC.distal
peak_1178	0.561707	ATAC.distal
peak_1179	0.778654	ATAC.distal
peak_1180	0.371648	ATAC.distal
peak_1181	0.626485	ATAC.distal
peak_1182	1.1853	ATAC.distal
peak_1183	0.901494	ATAC.distal
peak_1184	1.19494	ATAC.distal
peak_1185	0.791992	ATAC.distal
peak_1188	0.433588	ATAC.distal
peak_1189	0.837083	ATAC.distal
peak_1190	0.91793	ATAC.distal
peak_1191	0.653853	ATAC.distal
peak_1192	0.820906	ATAC.distal
peak_1193	0.647829	ATAC.distal
peak_1194	0.518539	ATAC.distal
peak_1195	0.777719	ATAC.distal
peak_1196	1.14911	ATAC.distal
peak_1200	1.01361	ATAC.distal
peak_1201	0.568698	ATAC.distal
peak_1202	0.615824	ATAC.distal
peak_1204	0.934238	ATAC.distal
peak_1205	0.888866	ATAC.distal
peak_1206	0.546631	ATAC.distal
peak_1213	0.686138	ATAC.distal
peak_1214	0.507328	ATAC.distal
peak_1219	0.508227	ATAC.distal
peak_1220	0.450191	ATAC.distal
peak_1221	0.589443	ATAC.distal
peak_1222	0.728459	ATAC.distal
peak_1223	0.801747	ATAC.distal
peak_1224	0.765521	ATAC.distal
peak_1225	0.939935	ATAC.distal
peak_1226	0.593036	ATAC.distal
peak_1228	0.863761	ATAC.distal
peak_1229	0.515294	ATAC.distal
peak_1232	0.364223	ATAC.distal
peak_1241	0.927257	ATAC.distal
peak_1242	0.58104	ATAC.distal
peak_1243	0.878538	ATAC.distal
peak_1244	0.762831	ATAC.distal
peak_1248	1.0729	ATAC.distal
peak_1249	0.786023	ATAC.distal
peak_1250	0.464233	ATAC.distal
peak_1253	1.26204	ATAC.distal
peak_1254	1.21103	ATAC.distal
peak_1256	0.597916	ATAC.distal
peak_1259	1.17709	ATAC.distal
peak_1260	0.830317	ATAC.distal
peak_1265	1.00164	ATAC.distal
peak_1268	1.1052	ATAC.distal
peak_1269	1.16319	ATAC.distal
peak_1278	0.631364	ATAC.distal
peak_1279	0.979487	ATAC.distal
peak_1280	0.983621	ATAC.distal
peak_1281	0.0410561	ATAC.distal
peak_1282	0.0275083	ATAC.distal
peak_1283	0.847006	ATAC.distal
peak_1284	0.930372	ATAC.distal
peak_1285	0.926955	ATAC.distal
peak_1286	0.6091	ATAC.distal
peak_1287	0.698546	ATAC.distal
peak_1289	0.913744	ATAC.distal
peak_1290	0.545894	ATAC.distal
peak_1292	0.972358	ATAC.distal
peak_1295	0.856012	ATAC.distal
peak_1296	0.889038	ATAC.distal
peak_1297	1.0557	ATAC.distal
peak_1299	0.737392	ATAC.distal
peak_1300	0.0546311	ATAC.distal
peak_1304	-0.0618333	ATAC.distal
peak_1305	0.779417	ATAC.distal
peak_1306	0.710905	ATAC.distal
peak_1308	1.05182	ATAC.distal
peak_1309	1.06754	ATAC.distal
peak_1311	1.01935	ATAC.distal
peak_1312	0.604736	ATAC.distal
peak_1313	0.179917	ATAC.distal
peak_1314	0.530079	ATAC.distal
peak_1317	0.910215	ATAC.distal
peak_1324	0.586073	ATAC.distal
peak_1325	1.03449	ATAC.distal
peak_1331	0.41736	ATAC.distal
peak_1332	0.631444	ATAC.distal
peak_1333	0.919542	ATAC.distal
peak_1335	0.524431	ATAC.distal
peak_1336	0.559741	ATAC.distal
peak_1337	0.514554	ATAC.distal
peak_1338	0.304351	ATAC.distal
peak_1340	0.797264	ATAC.distal
peak_1344	0.481915	ATAC.distal
peak_1345	0.981208	ATAC.distal
peak_1346	0.714978	ATAC.distal
peak_1347	0.656586	ATAC.distal
peak_1348	0.630562	ATAC.distal
peak_1351	0.186782	ATAC.distal
peak_1353	0.432737	ATAC.distal
peak_1361	0.893013	ATAC.distal
peak_1366	1.17766	ATAC.distal
peak_1367	1.06275	ATAC.distal
peak_1368	0.934429	ATAC.distal
peak_1371	0.477933	ATAC.distal
peak_1374	0.762317	ATAC.distal
peak_1376	0.870421	ATAC.distal
peak_1377	0.714328	ATAC.distal
peak_1378	0.541785	ATAC.distal
peak_1387	0.947211	ATAC.distal
peak_1391	0.659789	ATAC.distal
peak_1398	0.803621	ATAC.distal
peak_1399	0.81623	ATAC.distal
peak_1400	0.748142	ATAC.distal
peak_1401	0.657308	ATAC.distal
peak_1402	0.588987	ATAC.distal
peak_1403	0.553122	ATAC.distal
peak_1405	0.590446	ATAC.distal
peak_1406	0.376349	ATAC.distal
peak_1411	0.585777	ATAC.distal
peak_1412	0.504262	ATAC.distal
peak_1416	1.32762	ATAC.distal
peak_1417	0.780844	ATAC.distal
peak_1418	0.734571	ATAC.distal
peak_1419	0.652595	ATAC.distal
peak_1420	0.724795	ATAC.distal
peak_1421	0.421902	ATAC.distal
peak_1422	0.684453	ATAC.distal
peak_1423	1.29767	ATAC.distal
peak_1424	0.510211	ATAC.distal
peak_1427	0.436099	ATAC.distal
peak_1428	1.13645	ATAC.distal
peak_1429	0.407444	ATAC.distal
peak_1431	0.759342	ATAC.distal
peak_1432	0.779541	ATAC.distal
peak_1433	0.942296	ATAC.distal
peak_1434	1.10702	ATAC.distal
peak_1435	0.983222	ATAC.distal
peak_1436	0.735716	ATAC.distal
peak_1438	0.599083	ATAC.distal
peak_1439	0.841928	ATAC.distal
peak_1442	0.62018	ATAC.distal
peak_1443	0.753438	ATAC.distal
peak_1444	0.400276	ATAC.distal
peak_1447	0.694191	ATAC.distal
peak_1450	0.336905	ATAC.distal
peak_1452	0.752394	ATAC.distal
peak_1453	0.73932	ATAC.distal
peak_1454	0.595135	ATAC.distal
peak_1455	0.56593	ATAC.distal
peak_1456	0.576653	ATAC.distal
peak_1457	0.703937	ATAC.distal
peak_1458	0.863414	ATAC.distal
peak_1459	0.596979	ATAC.distal
peak_1460	0.704718	ATAC.distal
peak_1461	0.365637	ATAC.distal
peak_1462	0.551035	ATAC.distal
peak_1463	0.574646	ATAC.distal
peak_1465	0.688279	ATAC.distal
peak_1472	0.698867	ATAC.distal
peak_1476	0.311958	ATAC.distal
peak_1477	0.219226	ATAC.distal
peak_1478	0.418058	ATAC.distal
peak_1479	0.60041	ATAC.distal
peak_1480	0.441747	ATAC.distal
peak_1481	0.649194	ATAC.distal
peak_1482	0.919417	ATAC.distal
peak_1483	0.570296	ATAC.distal
peak_1485	0.756159	ATAC.distal
peak_1486	0.708612	ATAC.distal
peak_1487	0.366199	ATAC.distal
peak_1492	0.576801	ATAC.distal
peak_1493	0.498388	ATAC.distal
peak_1494	0.879962	ATAC.distal
peak_1497	0.787425	ATAC.distal
peak_1498	0.871093	ATAC.distal
peak_1499	0.876267	ATAC.distal
peak_1500	0.980927	ATAC.distal
peak_1506	0.219018	ATAC.distal
peak_1508	1.19177	ATAC.distal
peak_1509	1.08812	ATAC.distal
peak_1510	1.03185	ATAC.distal
peak_1511	1.02886	ATAC.distal
peak_1512	0.680038	ATAC.distal
peak_1513	1.28505	ATAC.distal
peak_1514	1.30264	ATAC.distal
peak_1515	1.01697	ATAC.distal
peak_1516	0.965285	ATAC.distal
peak_1517	0.803313	ATAC.distal
peak_1519	0.755048	ATAC.distal
peak_1520	0.870786	ATAC.distal
peak_1521	0.710016	ATAC.distal
peak_1522	0.844425	ATAC.distal
peak_1523	1.16234	ATAC.distal
peak_1525	0.720843	ATAC.distal
peak_1526	1.17349	ATAC.distal
peak_1527	0.972762	ATAC.distal
peak_1528	0.592319	ATAC.distal
peak_1529	1.06678	ATAC.distal
peak_1530	0.81731	ATAC.distal
peak_1531	0.79663	ATAC.distal
peak_1532	1.00936	ATAC.distal
peak_1533	0.906256	ATAC.distal
peak_1534	0.756207	ATAC.distal
peak_1535	0.671409	ATAC.distal
peak_1536	0.780145	ATAC.distal
peak_1537	0.743156	ATAC.distal
peak_1542	0.85062	ATAC.distal
peak_1543	1.06756	ATAC.distal
peak_1544	1.04885	ATAC.distal
peak_1545	0.967264	ATAC.distal
peak_1546	1.19934	ATAC.distal
peak_1547	0.872932	ATAC.distal
peak_1548	0.814249	ATAC.distal
peak_1549	0.547963	ATAC.distal
peak_1550	0.974369	ATAC.distal
peak_1551	1.17291	ATAC.distal
peak_1552	0.56169	ATAC.distal
peak_1557	1.27237	ATAC.distal
peak_1558	0.926772	ATAC.distal
peak_1559	1.29875	ATAC.distal
peak_1560	0.835951	ATAC.distal
peak_1561	0.834314	ATAC.distal
peak_1562	0.728317	ATAC.distal
peak_1563	0.769762	ATAC.distal
peak_1564	0.949018	ATAC.distal
peak_1565	1.17576	ATAC.distal
peak_1566	1.17473	ATAC.distal
peak_1567	1.10561	ATAC.distal
peak_1568	0.921626	ATAC.distal
peak_1569	0.980104	ATAC.distal
peak_1570	0.920657	ATAC.distal
peak_1571	1.09313	ATAC.distal
peak_1572	0.905892	ATAC.distal
peak_1573	0.727835	ATAC.distal
peak_1574	1.15444	ATAC.distal
peak_1575	0.529826	ATAC.distal
peak_1576	0.841612	ATAC.distal
peak_1579	0.823984	ATAC.distal
peak_1580	1.1346	ATAC.distal
peak_1588	0.997774	ATAC.distal
peak_1595	0.500041	ATAC.distal
peak_1596	0.811439	ATAC.distal
peak_1597	0.486039	ATAC.distal
peak_1598	0.519886	ATAC.distal
peak_1599	0.680118	ATAC.distal
peak_1600	0.55301	ATAC.distal
peak_1603	1.05942	ATAC.distal
peak_1604	0.281299	ATAC.distal
peak_1605	0.934728	ATAC.distal
peak_1606	0.805488	ATAC.distal
peak_1608	0.794174	ATAC.distal
peak_1610	1.03918	ATAC.distal
peak_1613	0.704411	ATAC.distal
peak_1614	0.761658	ATAC.distal
peak_1615	1.09587	ATAC.distal
peak_1616	0.623999	ATAC.distal
peak_1617	0.627487	ATAC.distal
peak_1620	0.608454	ATAC.distal
peak_1621	0.539271	ATAC.distal
peak_1622	0.681486	ATAC.distal
peak_1624	0.993109	ATAC.distal
peak_1625	0.494531	ATAC.distal
peak_1626	0.294876	ATAC.distal
peak_1627	0.422475	ATAC.distal
peak_1628	0.261065	ATAC.distal
peak_1629	0.664221	ATAC.distal
peak_1630	0.360399	ATAC.distal
peak_1631	0.454153	ATAC.distal
peak_1634	0.311752	ATAC.distal
peak_1635	0.367986	ATAC.distal
peak_1636	0.218574	ATAC.distal
peak_1637	0.437994	ATAC.distal
peak_1638	0.472499	ATAC.distal
peak_1639	0.699373	ATAC.distal
peak_1640	0.663413	ATAC.distal
peak_1641	0.669692	ATAC.distal
peak_1642	0.404096	ATAC.distal
peak_1643	0.142635	ATAC.distal
peak_1644	0.626124	ATAC.distal
peak_1645	0.613843	ATAC.distal
peak_1647	0.476247	ATAC.distal
peak_1649	0.71568	ATAC.distal
peak_1650	0.517102	ATAC.distal
peak_1652	0.994804	ATAC.distal
peak_1654	0.65424	ATAC.distal
peak_1661	1.0772	ATAC.distal
peak_1662	1.18285	ATAC.distal
peak_1663	0.636636	ATAC.distal
peak_1667	1.22479	ATAC.distal
peak_1668	0.767438	ATAC.distal
peak_1670	0.473703	ATAC.distal
peak_1674	0.700019	ATAC.distal
peak_1675	0.607327	ATAC.distal
peak_1676	0.454639	ATAC.distal
peak_1682	0.358724	ATAC.distal
peak_1690	0.552736	ATAC.distal
peak_1691	1.0173	ATAC.distal
peak_1692	0.808616	ATAC.distal
peak_1694	0.83861	ATAC.distal
peak_1699	1.19617	ATAC.distal
peak_1707	0.833163	ATAC.distal
peak_1710	0.397595	ATAC.distal
peak_1713	0.64346	ATAC.distal
peak_1714	0.845917	ATAC.distal
peak_1715	0.00054717	ATAC.distal
peak_1718	0.707884	ATAC.distal
peak_1719	0.665646	ATAC.distal
peak_1720	0.509153	ATAC.distal
peak_1721	0.68967	ATAC.distal
peak_1722	0.317698	ATAC.distal
peak_1725	0.829477	ATAC.distal
peak_1726	0.84002	ATAC.distal
peak_1728	0.462735	ATAC.distal
peak_1729	0.637413	ATAC.distal
peak_1731	0.6242	ATAC.distal
peak_1732	0.710952	ATAC.distal
peak_1733	0.704359	ATAC.distal
peak_1737	0.761167	ATAC.distal
peak_1738	0.207256	ATAC.distal
peak_1740	0.621051	ATAC.distal
peak_1742	0.910236	ATAC.distal
peak_1743	0.638335	ATAC.distal
peak_1744	0.775674	ATAC.distal
peak_1745	0.989326	ATAC.distal
peak_1746	0.628364	ATAC.distal
peak_1747	0.585558	ATAC.distal
peak_1748	0.648743	ATAC.distal
peak_1749	0.789012	ATAC.distal
peak_1750	1.14715	ATAC.distal
peak_1751	1.09447	ATAC.distal
peak_1752	0.70453	ATAC.distal
peak_1753	0.693957	ATAC.distal
peak_1754	0.766563	ATAC.distal
peak_1755	0.703161	ATAC.distal
peak_1756	0.499114	ATAC.distal
peak_1757	0.602742	ATAC.distal
peak_1758	0.468206	ATAC.distal
peak_1759	0.43286	ATAC.distal
peak_1760	0.934799	ATAC.distal
peak_1761	0.667206	ATAC.distal
peak_1762	0.631844	ATAC.distal
peak_1763	0.646194	ATAC.distal
peak_1764	0.575427	ATAC.distal
peak_1765	1.02067	ATAC.distal
peak_1766	0.89336	ATAC.distal
peak_1767	0.759401	ATAC.distal
peak_1768	0.591777	ATAC.distal
peak_1770	0.467726	ATAC.distal
peak_1771	0.476241	ATAC.distal
peak_1772	0.205362	ATAC.distal
peak_1773	0.668831	ATAC.distal
peak_1774	0.920648	ATAC.distal
peak_1775	0.923684	ATAC.distal
peak_1776	0.624106	ATAC.distal
peak_1777	1.17084	ATAC.distal
peak_1778	0.643242	ATAC.distal
peak_1779	0.556465	ATAC.distal
peak_1780	1.16859	ATAC.distal
peak_1781	0.74283	ATAC.distal
peak_1782	0.970402	ATAC.distal
peak_1783	0.861111	ATAC.distal
peak_1785	1.34897	ATAC.distal
peak_1786	1.33053	ATAC.distal
peak_1787	1.07397	ATAC.distal
peak_1794	0.0396154	ATAC.distal
peak_1795	0.931958	ATAC.distal
peak_1796	0.217846	ATAC.distal
peak_1798	0.378875	ATAC.distal
peak_1799	-0.00390419	ATAC.distal
peak_1801	0.762752	ATAC.distal
peak_1802	0.626478	ATAC.distal
peak_1816	1.00764	ATAC.distal
peak_1817	0.70975	ATAC.distal
peak_1818	0.639769	ATAC.distal
peak_1827	0.98263	ATAC.distal
peak_1831	0.883415	ATAC.distal
peak_1832	0.646016	ATAC.distal
peak_1833	0.790825	ATAC.distal
peak_1835	0.520674	ATAC.distal
peak_1836	1.00849	ATAC.distal
peak_1837	1.28442	ATAC.distal
peak_1838	0.454792	ATAC.distal
peak_1839	0.537251	ATAC.distal
peak_1844	0.635055	ATAC.distal
peak_1845	0.788545	ATAC.distal
peak_1846	0.758737	ATAC.distal
peak_1847	0.496421	ATAC.distal
peak_1848	0.818291	ATAC.distal
peak_1849	1.04831	ATAC.distal
peak_1850	0.851499	ATAC.distal
peak_1851	1.07136	ATAC.distal
peak_1854	0.615809	ATAC.distal
peak_1855	0.858809	ATAC.distal
peak_1856	0.765262	ATAC.distal
peak_1857	0.793798	ATAC.distal
peak_1858	1.10654	ATAC.distal
peak_1863	0.757221	ATAC.distal
peak_1867	0.57212	ATAC.distal
peak_1868	0.993681	ATAC.distal
peak_1870	0.372805	ATAC.distal
peak_1872	0.812696	ATAC.distal
peak_1879	1.30463	ATAC.distal
peak_1880	0.439829	ATAC.distal
peak_1881	0.471841	ATAC.distal
peak_1882	1.20842	ATAC.distal
peak_1887	0.942385	ATAC.distal
peak_1888	0.93146	ATAC.distal
peak_1889	0.689589	ATAC.distal
peak_1890	0.839682	ATAC.distal
peak_1891	0.693226	ATAC.distal
peak_1892	1.19369	ATAC.distal
peak_1893	0.758094	ATAC.distal
peak_1894	1.01208	ATAC.distal
peak_1895	0.837086	ATAC.distal
peak_1897	1.0223	ATAC.distal
peak_1899	1.11159	ATAC.distal
peak_1904	0.845497	ATAC.distal
peak_1905	0.716132	ATAC.distal
peak_1906	0.756124	ATAC.distal
peak_1907	0.78339	ATAC.distal
peak_1908	0.595409	ATAC.distal
peak_1913	0.627548	ATAC.distal
peak_1914	0.607562	ATAC.distal
peak_1915	0.509811	ATAC.distal
peak_1916	0.338209	ATAC.distal
peak_1919	0.377136	ATAC.distal
peak_1920	0.179778	ATAC.distal
peak_1921	0.402881	ATAC.distal
peak_1922	1.12262	ATAC.distal
peak_1923	0.934734	ATAC.distal
peak_1924	0.31587	ATAC.distal
peak_1930	0.967853	ATAC.distal
peak_1931	1.10197	ATAC.distal
peak_1932	1.00127	ATAC.distal
peak_1933	0.705005	ATAC.distal
peak_1937	0.751	ATAC.distal
peak_1938	0.923232	ATAC.distal
peak_1939	0.814779	ATAC.distal
peak_1940	0.753347	ATAC.distal
peak_1941	0.751004	ATAC.distal
peak_1942	0.830186	ATAC.distal
peak_1943	0.766374	ATAC.distal
peak_1944	1.32927	ATAC.distal
peak_1945	1.02873	ATAC.distal
peak_1946	0.870939	ATAC.distal
peak_1947	0.983837	ATAC.distal
peak_1948	0.827613	ATAC.distal
peak_1949	0.47004	ATAC.distal
peak_1950	1.05041	ATAC.distal
peak_1952	1.12377	ATAC.distal
peak_1953	0.611738	ATAC.distal
peak_1956	0.881389	ATAC.distal
peak_1957	0.920026	ATAC.distal
peak_1958	0.705306	ATAC.distal
peak_1960	1.03448	ATAC.distal
peak_1966	0.93481	ATAC.distal
peak_1967	0.700109	ATAC.distal
peak_1968	0.341827	ATAC.distal
peak_1971	0.541	ATAC.distal
peak_1975	1.19369	ATAC.distal
peak_1978	0.685143	ATAC.distal
peak_1985	1.18325	ATAC.distal
peak_1986	1.13487	ATAC.distal
peak_1988	0.520954	ATAC.distal
peak_1989	0.714478	ATAC.distal
peak_1990	0.628833	ATAC.distal
peak_1991	0.702057	ATAC.distal
peak_1992	0.781882	ATAC.distal
peak_1996	1.23498	ATAC.distal
peak_1999	0.860887	ATAC.distal
peak_2001	0.132169	ATAC.distal
peak_2002	0.934885	ATAC.distal
peak_2004	0.23061	ATAC.distal
peak_2005	1.20773	ATAC.distal
peak_2007	0.768632	ATAC.distal
peak_2009	0.638678	ATAC.distal
peak_2010	0.498349	ATAC.distal
peak_2011	0.515883	ATAC.distal
peak_2012	0.695329	ATAC.distal
peak_2016	1.35396	ATAC.distal
peak_2019	0.245194	ATAC.distal
peak_2021	0.169019	ATAC.distal
peak_2022	0.197026	ATAC.distal
peak_2023	0.530808	ATAC.distal
peak_2024	0.525513	ATAC.distal
peak_2025	0.555901	ATAC.distal
peak_2026	0.394188	ATAC.distal
peak_2027	0.531174	ATAC.distal
peak_2028	0.568911	ATAC.distal
peak_2029	0.543129	ATAC.distal
peak_2030	0.697256	ATAC.distal
peak_2031	0.603307	ATAC.distal
peak_2032	0.682777	ATAC.distal
peak_2033	0.48473	ATAC.distal
peak_2034	0.781626	ATAC.distal
peak_2035	0.446456	ATAC.distal
peak_2036	0.71556	ATAC.distal
peak_2038	0.326991	ATAC.distal
peak_2039	0.661057	ATAC.distal
peak_2040	0.633114	ATAC.distal
peak_2041	0.714667	ATAC.distal
peak_2042	0.405383	ATAC.distal
peak_2043	0.748979	ATAC.distal
peak_2045	0.481964	ATAC.distal
peak_2046	0.566448	ATAC.distal
peak_2047	0.6312	ATAC.distal
peak_2048	0.764725	ATAC.distal
peak_2051	0.683981	ATAC.distal
peak_2057	0.41341	ATAC.distal
peak_2058	0.191853	ATAC.distal
peak_2059	0.374595	ATAC.distal
peak_2060	0.529296	ATAC.distal
peak_2062	0.637921	ATAC.distal
peak_2063	0.962009	ATAC.distal
peak_2064	1.15375	ATAC.distal
peak_2065	0.714304	ATAC.distal
peak_2066	0.594239	ATAC.distal
peak_2067	0.469329	ATAC.distal
peak_2068	0.41465	ATAC.distal
peak_2069	0.517043	ATAC.distal
peak_2070	0.22068	ATAC.distal
peak_2073	0.710571	ATAC.distal
peak_2074	0.898382	ATAC.distal
peak_2075	0.842759	ATAC.distal
peak_2077	0.534258	ATAC.distal
peak_2078	0.5274	ATAC.distal
peak_2079	0.499511	ATAC.distal
peak_2081	0.340096	ATAC.distal
peak_2082	0.883303	ATAC.distal
peak_2084	1.15681	ATAC.distal
peak_2085	0.493551	ATAC.distal
peak_2086	0.756883	ATAC.distal
peak_2087	0.809355	ATAC.distal
peak_2088	0.9502	ATAC.distal
peak_2089	0.806919	ATAC.distal
peak_2090	0.649595	ATAC.distal
peak_2091	0.75798	ATAC.distal
peak_2092	1.0103	ATAC.distal
peak_2094	0.590299	ATAC.distal
peak_2095	0.872738	ATAC.distal
peak_2096	0.753073	ATAC.distal
peak_2097	0.808614	ATAC.distal
peak_2098	0.902798	ATAC.distal
peak_2099	1.02284	ATAC.distal
peak_2100	0.753123	ATAC.distal
peak_2101	1.11439	ATAC.distal
peak_2102	0.772729	ATAC.distal
peak_2104	0.529522	ATAC.distal
peak_2108	0.946319	ATAC.distal
peak_2109	0.762164	ATAC.distal
peak_2110	0.945857	ATAC.distal
peak_2111	0.213896	ATAC.distal
peak_2112	0.753144	ATAC.distal
peak_2113	0.81238	ATAC.distal
peak_2114	1.01336	ATAC.distal
peak_2115	0.898303	ATAC.distal
peak_2118	0.900214	ATAC.distal
peak_2119	0.934183	ATAC.distal
peak_2120	0.884696	ATAC.distal
peak_2121	1.33142	ATAC.distal
peak_2122	0.909333	ATAC.distal
peak_2123	0.779016	ATAC.distal
peak_2124	0.997661	ATAC.distal
peak_2128	0.493222	ATAC.distal
peak_2130	0.508151	ATAC.distal
peak_2132	1.14522	ATAC.distal
peak_2134	0.94337	ATAC.distal
peak_2135	0.880315	ATAC.distal
peak_2138	0.701711	ATAC.distal
peak_2139	0.599731	ATAC.distal
peak_2140	0.674879	ATAC.distal
peak_2141	1.20902	ATAC.distal
peak_2144	1.34236	ATAC.distal
peak_2151	0.275954	ATAC.distal
peak_2152	0.223475	ATAC.distal
peak_2154	0.732356	ATAC.distal
peak_2155	0.798296	ATAC.distal
peak_2156	0.887542	ATAC.distal
peak_2157	0.531211	ATAC.distal
peak_2158	0.622962	ATAC.distal
peak_2162	1.37725	ATAC.distal
peak_2163	0.597537	ATAC.distal
peak_2164	0.670071	ATAC.distal
peak_2165	0.627868	ATAC.distal
peak_2166	0.579939	ATAC.distal
peak_2167	1.0142	ATAC.distal
peak_2168	0.694806	ATAC.distal
peak_2169	0.917	ATAC.distal
peak_2170	0.646728	ATAC.distal
peak_2171	0.553937	ATAC.distal
peak_2172	0.572768	ATAC.distal
peak_2175	0.636531	ATAC.distal
peak_2176	0.607358	ATAC.distal
peak_2177	0.487958	ATAC.distal
peak_2178	0.85078	ATAC.distal
peak_2180	0.546533	ATAC.distal
peak_2181	0.547234	ATAC.distal
peak_2182	0.714278	ATAC.distal
peak_2183	0.446215	ATAC.distal
peak_2185	0.746109	ATAC.distal
peak_2186	0.550967	ATAC.distal
peak_2187	0.742805	ATAC.distal
peak_2188	0.689735	ATAC.distal
peak_2189	0.675703	ATAC.distal
peak_2190	0.678594	ATAC.distal
peak_2191	0.608721	ATAC.distal
peak_2192	0.694579	ATAC.distal
peak_2195	0.402207	ATAC.distal
peak_2196	0.752122	ATAC.distal
peak_2197	0.89167	ATAC.distal
peak_2198	0.692825	ATAC.distal
peak_2199	0.882847	ATAC.distal
peak_2200	0.528263	ATAC.distal
peak_2201	0.542913	ATAC.distal
peak_2202	0.708366	ATAC.distal
peak_2203	0.630264	ATAC.distal
peak_2205	0.854447	ATAC.distal
peak_2206	0.53456	ATAC.distal
peak_2207	0.750961	ATAC.distal
peak_2208	0.733069	ATAC.distal
peak_2209	0.760746	ATAC.distal
peak_2210	0.90784	ATAC.distal
peak_2211	0.707216	ATAC.distal
peak_2212	0.664492	ATAC.distal
peak_2213	0.856103	ATAC.distal
peak_2214	0.929282	ATAC.distal
peak_2215	1.06348	ATAC.distal
peak_2216	0.522567	ATAC.distal
peak_2217	0.617644	ATAC.distal
peak_2220	0.704514	ATAC.distal
peak_2221	1.34494	ATAC.distal
peak_2222	0.960673	ATAC.distal
peak_2226	0.499958	ATAC.distal
peak_2227	0.566633	ATAC.distal
peak_2232	0.784877	ATAC.distal
peak_2235	0.53775	ATAC.distal
peak_2239	0.76853	ATAC.distal
peak_2240	0.380608	ATAC.distal
peak_2241	0.422679	ATAC.distal
peak_2247	0.713931	ATAC.distal
peak_2257	0.701449	ATAC.distal
peak_2258	1.10041	ATAC.distal
peak_2259	0.799792	ATAC.distal
peak_2260	0.552817	ATAC.distal
peak_2261	1.05546	ATAC.distal
peak_2262	0.384839	ATAC.distal
peak_2265	0.681191	ATAC.distal
peak_2266	0.9775	ATAC.distal
peak_2267	0.664653	ATAC.distal
peak_2268	0.652603	ATAC.distal
peak_2269	0.766645	ATAC.distal
peak_2273	0.971241	ATAC.distal
peak_2274	0.783909	ATAC.distal
peak_2277	0.652826	ATAC.distal
peak_2278	0.516811	ATAC.distal
peak_2279	0.437695	ATAC.distal
peak_2280	0.547522	ATAC.distal
peak_2281	0.596623	ATAC.distal
peak_2282	0.543869	ATAC.distal
peak_2283	0.486388	ATAC.distal
peak_2284	0.983841	ATAC.distal
peak_2285	0.655181	ATAC.distal
peak_2286	0.412927	ATAC.distal
peak_2287	0.761734	ATAC.distal
peak_2288	0.790604	ATAC.distal
peak_2289	0.730153	ATAC.distal
peak_2290	0.697173	ATAC.distal
peak_2291	0.766412	ATAC.distal
peak_2292	0.544364	ATAC.distal
peak_2293	0.769695	ATAC.distal
peak_2294	0.491264	ATAC.distal
peak_2298	0.997542	ATAC.distal
peak_2299	0.456977	ATAC.distal
peak_2302	0.601467	ATAC.distal
peak_2305	0.775377	ATAC.distal
peak_2306	0.458216	ATAC.distal
peak_2307	0.229635	ATAC.distal
peak_2308	0.316914	ATAC.distal
peak_2309	0.633628	ATAC.distal
peak_2316	0.332864	ATAC.distal
peak_2317	0.475894	ATAC.distal
peak_2318	0.793841	ATAC.distal
peak_2322	0.655933	ATAC.distal
peak_2323	1.34999	ATAC.distal
peak_2325	1.16739	ATAC.distal
peak_2326	1.07771	ATAC.distal
peak_2327	1.01572	ATAC.distal
peak_2328	1.22268	ATAC.distal
peak_2331	0.49626	ATAC.distal
peak_2332	1.37405	ATAC.distal
peak_2333	0.806277	ATAC.distal
peak_2334	0.557168	ATAC.distal
peak_2335	0.57018	ATAC.distal
peak_2343	0.654578	ATAC.distal
peak_2344	0.673867	ATAC.distal
peak_2345	0.500115	ATAC.distal
peak_2346	0.287661	ATAC.distal
peak_2347	0.615151	ATAC.distal
peak_2348	0.537818	ATAC.distal
peak_2349	0.639515	ATAC.distal
peak_2350	0.340044	ATAC.distal
peak_2351	0.659913	ATAC.distal
peak_2352	0.620493	ATAC.distal
peak_2353	0.920713	ATAC.distal
peak_2354	0.629974	ATAC.distal
peak_2355	1.02945	ATAC.distal
peak_2356	1.33077	ATAC.distal
peak_2358	0.914638	ATAC.distal
peak_2360	0.162173	ATAC.distal
peak_2361	0.354354	ATAC.distal
peak_2362	0.563172	ATAC.distal
peak_2363	0.982386	ATAC.distal
peak_2368	0.39234	ATAC.distal
peak_2372	0.646379	ATAC.distal
peak_2373	0.416609	ATAC.distal
peak_2374	0.678909	ATAC.distal
peak_2375	0.083814	ATAC.distal
peak_2376	0.445157	ATAC.distal
peak_2377	0.429487	ATAC.distal
peak_2378	0.871161	ATAC.distal
peak_2379	0.921005	ATAC.distal
peak_2382	0.565911	ATAC.distal
peak_2386	0.779233	ATAC.distal
peak_2391	1.0782	ATAC.distal
peak_2392	1.0609	ATAC.distal
peak_2393	0.229215	ATAC.distal
peak_2394	0.257819	ATAC.distal
peak_2397	0.286813	ATAC.distal
peak_2399	0.802396	ATAC.distal
peak_2400	0.48812	ATAC.distal
peak_2401	0.956764	ATAC.distal
peak_2402	0.462926	ATAC.distal
peak_2403	0.838161	ATAC.distal
peak_2404	0.590728	ATAC.distal
peak_2408	0.528843	ATAC.distal
peak_2409	0.465308	ATAC.distal
peak_2410	0.543252	ATAC.distal
peak_2411	0.864909	ATAC.distal
peak_2412	0.520673	ATAC.distal
peak_2417	0.620956	ATAC.distal
peak_2424	0.361903	ATAC.distal
peak_2430	0.740236	ATAC.distal
peak_2432	0.168328	ATAC.distal
peak_2433	0.812477	ATAC.distal
peak_2434	0.88965	ATAC.distal
peak_2437	1.2375	ATAC.distal
peak_2442	0.985973	ATAC.distal
peak_2451	1.34617	ATAC.distal
peak_2452	1.26392	ATAC.distal
peak_2454	0.636482	ATAC.distal
peak_2458	0.836448	ATAC.distal
peak_2459	0.88471	ATAC.distal
peak_2461	0.648122	ATAC.distal
peak_2466	0.904853	ATAC.distal
peak_2467	0.999452	ATAC.distal
peak_2469	0.829085	ATAC.distal
peak_2470	0.674126	ATAC.distal
peak_2471	0.980168	ATAC.distal
peak_2483	0.290062	ATAC.distal
peak_2484	0.909636	ATAC.distal
peak_2485	0.479603	ATAC.distal
peak_2488	0.458746	ATAC.distal
peak_2489	0.362269	ATAC.distal
peak_2490	0.401685	ATAC.distal
peak_2499	0.745765	ATAC.distal
peak_2500	0.587385	ATAC.distal
peak_2501	0.82138	ATAC.distal
peak_2502	0.588549	ATAC.distal
peak_2503	0.710624	ATAC.distal
peak_2504	0.256891	ATAC.distal
peak_2506	0.62917	ATAC.distal
peak_2507	0.59628	ATAC.distal
peak_2508	0.937038	ATAC.distal
peak_2509	0.666334	ATAC.distal
peak_2510	0.930765	ATAC.distal
peak_2511	0.854489	ATAC.distal
peak_2512	0.886954	ATAC.distal
peak_2513	0.814847	ATAC.distal
peak_2514	0.137163	ATAC.distal
peak_2515	0.645534	ATAC.distal
peak_2516	0.782904	ATAC.distal
peak_2518	0.704792	ATAC.distal
peak_2519	0.827085	ATAC.distal
peak_2520	0.8568	ATAC.distal
peak_2521	0.919061	ATAC.distal
peak_2522	0.678153	ATAC.distal
peak_2523	0.580339	ATAC.distal
peak_2524	0.653199	ATAC.distal
peak_2525	0.722206	ATAC.distal
peak_2526	0.638043	ATAC.distal
peak_2528	0.743977	ATAC.distal
peak_2529	0.505371	ATAC.distal
peak_2530	1.23751	ATAC.distal
peak_2531	0.780003	ATAC.distal
peak_2532	0.546537	ATAC.distal
peak_2533	0.498713	ATAC.distal
peak_2534	0.785409	ATAC.distal
peak_2535	0.867722	ATAC.distal
peak_2538	0.341126	ATAC.distal
peak_2541	1.19162	ATAC.distal
peak_2542	0.991953	ATAC.distal
peak_2546	0.64529	ATAC.distal
peak_2548	0.601073	ATAC.distal
peak_2549	1.0884	ATAC.distal
peak_2551	0.452496	ATAC.distal
peak_2552	0.397846	ATAC.distal
peak_2555	1.28227	ATAC.distal
peak_2556	0.564047	ATAC.distal
peak_2557	0.418682	ATAC.distal
peak_2558	0.549904	ATAC.distal
peak_2559	0.563627	ATAC.distal
peak_2560	0.881162	ATAC.distal
peak_2561	0.75686	ATAC.distal
peak_2564	0.535938	ATAC.distal
peak_2567	0.7924	ATAC.distal
peak_2568	0.742134	ATAC.distal
peak_2569	0.769136	ATAC.distal
peak_2570	0.983205	ATAC.distal
peak_2571	0.877327	ATAC.distal
peak_2572	1.18125	ATAC.distal
peak_2573	0.990303	ATAC.distal
peak_2574	0.747437	ATAC.distal
peak_2575	1.06121	ATAC.distal
peak_2576	0.869087	ATAC.distal
peak_2577	0.750113	ATAC.distal
peak_2578	1.12493	ATAC.distal
peak_2579	0.934059	ATAC.distal
peak_2580	0.955957	ATAC.distal
peak_2581	1.11546	ATAC.distal
peak_2582	1.16095	ATAC.distal
peak_2583	0.997696	ATAC.distal
peak_2584	0.653103	ATAC.distal
peak_2585	1.06122	ATAC.distal
peak_2586	0.508364	ATAC.distal
peak_2587	0.728685	ATAC.distal
peak_2588	0.884706	ATAC.distal
peak_2589	0.876029	ATAC.distal
peak_2590	1.06304	ATAC.distal
peak_2591	1.05566	ATAC.distal
peak_2594	0.614976	ATAC.distal
peak_2595	0.785391	ATAC.distal
peak_2596	0.77312	ATAC.distal
peak_2597	0.864783	ATAC.distal
peak_2598	0.854509	ATAC.distal
peak_2599	1.06897	ATAC.distal
peak_2600	1.0272	ATAC.distal
peak_2601	0.734401	ATAC.distal
peak_2602	0.887174	ATAC.distal
peak_2603	0.737616	ATAC.distal
peak_2605	0.863553	ATAC.distal
peak_2606	0.457775	ATAC.distal
peak_2608	0.776751	ATAC.distal
peak_2609	0.85201	ATAC.distal
peak_2610	0.513124	ATAC.distal
peak_2611	0.735811	ATAC.distal
peak_2614	1.20262	ATAC.distal
peak_2615	0.899249	ATAC.distal
peak_2616	1.1991	ATAC.distal
peak_2617	0.990136	ATAC.distal
peak_2618	0.980769	ATAC.distal
peak_2619	0.950738	ATAC.distal
peak_2620	0.990675	ATAC.distal
peak_2621	0.80357	ATAC.distal
peak_2622	0.926796	ATAC.distal
peak_2623	1.1504	ATAC.distal
peak_2624	0.997664	ATAC.distal
peak_2627	0.552781	ATAC.distal
peak_2630	0.821529	ATAC.distal
peak_2631	0.812505	ATAC.distal
peak_2632	1.41775	ATAC.distal
peak_2633	0.848386	ATAC.distal
peak_2639	0.214995	ATAC.distal
peak_2640	0.184213	ATAC.distal
peak_2644	0.166942	ATAC.distal
peak_2645	0.432786	ATAC.distal
peak_2647	0.356181	ATAC.distal
peak_2648	0.467412	ATAC.distal
peak_2650	0.446559	ATAC.distal
peak_2651	1.08882	ATAC.distal
peak_2652	0.324583	ATAC.distal
peak_2655	0.865523	ATAC.distal
peak_2656	0.438464	ATAC.distal
peak_2661	0.43206	ATAC.distal
peak_2662	0.958918	ATAC.distal
peak_2664	0.341693	ATAC.distal
peak_2665	-0.0501066	ATAC.distal
peak_2666	0.578908	ATAC.distal
peak_2668	0.780369	ATAC.distal
peak_2670	0.508995	ATAC.distal
peak_2671	0.686575	ATAC.distal
peak_2672	0.552036	ATAC.distal
peak_2673	0.577497	ATAC.distal
peak_2674	1.05794	ATAC.distal
peak_2675	0.698471	ATAC.distal
peak_2676	0.695423	ATAC.distal
peak_2677	0.506625	ATAC.distal
peak_2678	0.907776	ATAC.distal
peak_2679	0.6166	ATAC.distal
peak_2680	0.782066	ATAC.distal
peak_2681	0.646239	ATAC.distal
peak_2682	0.64328	ATAC.distal
peak_2683	0.412636	ATAC.distal
peak_2685	0.730073	ATAC.distal
peak_2686	0.646512	ATAC.distal
peak_2687	0.584016	ATAC.distal
peak_2688	0.446827	ATAC.distal
peak_2689	1.00218	ATAC.distal
peak_2690	0.576542	ATAC.distal
peak_2694	0.658382	ATAC.distal
peak_2695	0.444303	ATAC.distal
peak_2696	0.840517	ATAC.distal
peak_2699	0.55142	ATAC.distal
peak_2700	0.641617	ATAC.distal
peak_2701	0.706889	ATAC.distal
peak_2702	0.5463	ATAC.distal
peak_2703	0.692864	ATAC.distal
peak_2704	0.524839	ATAC.distal
peak_2705	0.465094	ATAC.distal
peak_2706	0.765845	ATAC.distal
peak_2707	0.668709	ATAC.distal
peak_2708	0.873175	ATAC.distal
peak_2709	0.912111	ATAC.distal
peak_2710	0.373672	ATAC.distal
peak_2711	0.873506	ATAC.distal
peak_2712	0.492113	ATAC.distal
peak_2713	0.713257	ATAC.distal
peak_2714	0.837081	ATAC.distal
peak_2715	0.456794	ATAC.distal
peak_2716	0.787734	ATAC.distal
peak_2717	0.573267	ATAC.distal
peak_2718	0.769793	ATAC.distal
peak_2719	0.929162	ATAC.distal
peak_2720	0.579229	ATAC.distal
peak_2721	1.11387	ATAC.distal
peak_2722	0.247784	ATAC.distal
peak_2724	0.541331	ATAC.distal
peak_2725	1.49999	ATAC.distal
peak_2726	1.09334	ATAC.distal
peak_2731	1.11366	ATAC.distal
peak_2732	0.385463	ATAC.distal
peak_2734	0.585688	ATAC.distal
peak_2737	0.261035	ATAC.distal
peak_2738	0.0341256	ATAC.distal
peak_2739	0.359543	ATAC.distal
peak_2741	0.566261	ATAC.distal
peak_2742	0.622702	ATAC.distal
peak_2744	1.05874	ATAC.distal
peak_2747	0.707863	ATAC.distal
peak_2748	0.673184	ATAC.distal
peak_2749	0.554603	ATAC.distal
peak_2750	0.729361	ATAC.distal
peak_2751	0.539156	ATAC.distal
peak_2752	0.476095	ATAC.distal
peak_2753	0.62199	ATAC.distal
peak_2756	0.473045	ATAC.distal
peak_2757	0.518638	ATAC.distal
peak_2758	0.511141	ATAC.distal
peak_2759	0.641184	ATAC.distal
peak_2760	0.963874	ATAC.distal
peak_2761	1.30782	ATAC.distal
peak_2762	1.04931	ATAC.distal
peak_2763	0.837659	ATAC.distal
peak_2764	0.591403	ATAC.distal
peak_2765	0.439872	ATAC.distal
peak_2766	0.162655	ATAC.distal
peak_2767	0.732966	ATAC.distal
peak_2768	0.0575483	ATAC.distal
peak_2771	0.401302	ATAC.distal
peak_2772	0.356914	ATAC.distal
peak_2773	1.52455	ATAC.distal
peak_2778	0.554021	ATAC.distal
peak_2779	0.558051	ATAC.distal
peak_2780	0.5926	ATAC.distal
peak_2781	0.292681	ATAC.distal
peak_2782	0.549216	ATAC.distal
peak_2783	0.517053	ATAC.distal
peak_2784	0.526338	ATAC.distal
peak_2785	1.08144	ATAC.distal
peak_2787	0.658152	ATAC.distal
peak_2788	0.608462	ATAC.distal
peak_2789	0.480411	ATAC.distal
peak_2791	0.196197	ATAC.distal
peak_2794	0.899908	ATAC.distal
peak_2795	0.880128	ATAC.distal
peak_2796	0.817854	ATAC.distal
peak_2797	1.17664	ATAC.distal
peak_2800	0.527879	ATAC.distal
peak_2802	0.363206	ATAC.distal
peak_2803	1.25401	ATAC.distal
peak_2804	1.21306	ATAC.distal
peak_2805	1.31372	ATAC.distal
peak_2806	1.02582	ATAC.distal
peak_2808	1.51	ATAC.distal
peak_2809	1.04506	ATAC.distal
peak_2814	0.821247	ATAC.distal
peak_2816	0.767281	ATAC.distal
peak_2818	0.954395	ATAC.distal
peak_2819	0.888781	ATAC.distal
peak_2820	0.792807	ATAC.distal
peak_2821	0.795777	ATAC.distal
peak_2822	0.580328	ATAC.distal
peak_2824	0.854272	ATAC.distal
peak_2825	0.846352	ATAC.distal
peak_2827	0.710726	ATAC.distal
peak_2828	0.64551	ATAC.distal
peak_2831	0.73426	ATAC.distal
peak_2833	0.259379	ATAC.distal
peak_2836	0.513954	ATAC.distal
peak_2837	0.80447	ATAC.distal
peak_2838	0.6549	ATAC.distal
peak_2840	0.56057	ATAC.distal
peak_2841	0.879175	ATAC.distal
peak_2842	0.688773	ATAC.distal
peak_2843	0.632564	ATAC.distal
peak_2844	0.67478	ATAC.distal
peak_2845	0.909112	ATAC.distal
peak_2846	0.536366	ATAC.distal
peak_2847	0.712166	ATAC.distal
peak_2848	0.606046	ATAC.distal
peak_2849	0.404208	ATAC.distal
peak_2854	1.34107	ATAC.distal
peak_2856	0.592488	ATAC.distal
peak_2857	0.80461	ATAC.distal
peak_2858	0.734163	ATAC.distal
peak_2859	0.720591	ATAC.distal
peak_2861	0.44932	ATAC.distal
peak_2862	0.528549	ATAC.distal
peak_2865	0.569343	ATAC.distal
peak_2866	0.846414	ATAC.distal
peak_2867	0.991224	ATAC.distal
peak_2868	0.590236	ATAC.distal
peak_2871	0.76882	ATAC.distal
peak_2877	0.184126	ATAC.distal
peak_2878	0.838093	ATAC.distal
peak_2884	1.13576	ATAC.distal
peak_2886	0.897597	ATAC.distal
peak_2887	0.906177	ATAC.distal
peak_2888	0.687991	ATAC.distal
peak_2889	0.889628	ATAC.distal
peak_2891	0.873723	ATAC.distal
peak_2892	0.974425	ATAC.distal
peak_2906	0.734343	ATAC.distal
peak_2907	0.907861	ATAC.distal
peak_2909	0.6929	ATAC.distal
peak_2910	0.364445	ATAC.distal
peak_2916	0.772902	ATAC.distal
peak_2922	0.467933	ATAC.distal
peak_2923	0.669882	ATAC.distal
peak_2925	0.869618	ATAC.distal
peak_2926	0.599987	ATAC.distal
peak_2933	1.04965	ATAC.distal
peak_2937	0.742179	ATAC.distal
peak_2939	0.447467	ATAC.distal
peak_2940	0.950517	ATAC.distal
peak_2941	0.276248	ATAC.distal
peak_2942	0.826963	ATAC.distal
peak_2947	0.95138	ATAC.distal
peak_2952	0.771	ATAC.distal
peak_2953	1.16431	ATAC.distal
peak_2954	0.808515	ATAC.distal
peak_2961	0.919971	ATAC.distal
peak_2964	0.707381	ATAC.distal
peak_2968	1.11995	ATAC.distal
peak_2975	0.32218	ATAC.distal
peak_2976	0.795825	ATAC.distal
peak_2987	0.195714	ATAC.distal
peak_2988	0.378492	ATAC.distal
peak_2992	0.0928889	ATAC.distal
peak_2994	0.276511	ATAC.distal
peak_2997	0.620951	ATAC.distal
peak_2998	0.201982	ATAC.distal
peak_3003	0.354354	ATAC.distal
peak_3011	0.318227	ATAC.distal
peak_3012	0.932967	ATAC.distal
peak_3013	0.567599	ATAC.distal
peak_3017	0.792688	ATAC.distal
peak_3019	0.737563	ATAC.distal
peak_3025	1.24786	ATAC.distal
peak_3030	0.619996	ATAC.distal
peak_3034	0.670346	ATAC.distal
peak_3038	0.650248	ATAC.distal
peak_3041	1.04142	ATAC.distal
peak_3043	0.898694	ATAC.distal
peak_3048	-0.955	ATAC.distal
peak_3055	0.292832	ATAC.distal
peak_3058	0.445244	ATAC.distal
peak_3062	0.866568	ATAC.distal
peak_3063	0.862364	ATAC.distal
peak_3064	0.41204	ATAC.distal
peak_3065	0.58867	ATAC.distal
peak_3066	0.306165	ATAC.distal
peak_3067	0.440296	ATAC.distal
peak_3068	0.603804	ATAC.distal
peak_3072	0.657712	ATAC.distal
peak_3073	0.0941247	ATAC.distal
peak_3075	0.809655	ATAC.distal
peak_3076	1.31432	ATAC.distal
peak_3078	0.617334	ATAC.distal
peak_3079	0.92434	ATAC.distal
peak_3080	0.684016	ATAC.distal
peak_3081	0.176353	ATAC.distal
peak_3082	0.575522	ATAC.distal
peak_3083	0.561374	ATAC.distal
peak_3084	0.469436	ATAC.distal
peak_3086	0.377058	ATAC.distal
peak_3087	0.183226	ATAC.distal
peak_3089	0.798839	ATAC.distal
peak_3090	1.06979	ATAC.distal
peak_3091	0.866903	ATAC.distal
peak_3092	0.974183	ATAC.distal
peak_3094	0.760603	ATAC.distal
peak_3098	0.427536	ATAC.distal
peak_3099	0.415388	ATAC.distal
peak_3100	0.654386	ATAC.distal
peak_3101	0.553539	ATAC.distal
peak_3102	0.537844	ATAC.distal
peak_3103	0.839712	ATAC.distal
peak_3104	0.457907	ATAC.distal
peak_3105	0.515682	ATAC.distal
peak_3106	0.878056	ATAC.distal
peak_3107	0.949607	ATAC.distal
peak_3109	0.979975	ATAC.distal
peak_3110	0.820664	ATAC.distal
peak_3111	0.829395	ATAC.distal
peak_3112	0.645429	ATAC.distal
peak_3113	0.719353	ATAC.distal
peak_3114	0.856787	ATAC.distal
peak_3115	0.724549	ATAC.distal
peak_3116	0.319485	ATAC.distal
peak_3117	0.679228	ATAC.distal
peak_3118	0.723804	ATAC.distal
peak_3119	0.672681	ATAC.distal
peak_3120	0.82229	ATAC.distal
peak_3121	0.407666	ATAC.distal
peak_3122	0.830591	ATAC.distal
peak_3123	0.939798	ATAC.distal
peak_3124	0.657807	ATAC.distal
peak_3125	0.483311	ATAC.distal
peak_3126	0.947011	ATAC.distal
peak_3127	0.670782	ATAC.distal
peak_3128	-0.0244338	ATAC.distal
peak_3129	0.384403	ATAC.distal
peak_3133	0.520803	ATAC.distal
peak_3134	0.762126	ATAC.distal
peak_3135	0.130733	ATAC.distal
peak_3144	0.659567	ATAC.distal
peak_3147	0.780246	ATAC.distal
peak_3150	0.646573	ATAC.distal
peak_3151	0.86813	ATAC.distal
peak_3152	0.622492	ATAC.distal
peak_3153	0.489375	ATAC.distal
peak_3154	0.478191	ATAC.distal
peak_3155	0.735509	ATAC.distal
peak_3158	0.560084	ATAC.distal
peak_3161	0.966546	ATAC.distal
peak_3162	0.93278	ATAC.distal
peak_3169	1.32222	ATAC.distal
peak_3172	1.33855	ATAC.distal
peak_3176	0.311507	ATAC.distal
peak_3178	0.994596	ATAC.distal
peak_3184	0.688125	ATAC.distal
peak_3185	0.874193	ATAC.distal
peak_3188	0.0538098	ATAC.distal
peak_3189	0.0194665	ATAC.distal
peak_3191	0.717435	ATAC.distal
peak_3192	0.852602	ATAC.distal
peak_3198	0.835988	ATAC.distal
peak_3199	1.00585	ATAC.distal
peak_3200	0.796772	ATAC.distal
peak_3201	0.960558	ATAC.distal
peak_3202	0.653787	ATAC.distal
peak_3204	0.495841	ATAC.distal
peak_3205	0.627923	ATAC.distal
peak_3206	0.753189	ATAC.distal
peak_3207	0.640149	ATAC.distal
peak_3208	0.684612	ATAC.distal
peak_3209	0.610751	ATAC.distal
peak_3210	0.666957	ATAC.distal
peak_3211	0.531011	ATAC.distal
peak_3212	0.695697	ATAC.distal
peak_3213	0.761054	ATAC.distal
peak_3214	0.322061	ATAC.distal
peak_3215	0.718207	ATAC.distal
peak_3217	0.819859	ATAC.distal
peak_3218	0.528315	ATAC.distal
peak_3219	0.884975	ATAC.distal
peak_3220	0.395473	ATAC.distal
peak_3221	0.796539	ATAC.distal
peak_3225	0.850585	ATAC.distal
peak_3228	0.741496	ATAC.distal
peak_3229	0.49693	ATAC.distal
peak_3230	0.64413	ATAC.distal
peak_3236	1.2382	ATAC.distal
peak_3246	0.497211	ATAC.distal
peak_3249	0.620222	ATAC.distal
peak_3250	0.339332	ATAC.distal
peak_3252	0.752371	ATAC.distal
peak_3253	0.729507	ATAC.distal
peak_3254	0.681952	ATAC.distal
peak_3255	0.806677	ATAC.distal
peak_3256	0.570987	ATAC.distal
peak_3257	0.618827	ATAC.distal
peak_3258	0.5322	ATAC.distal
peak_3259	0.596803	ATAC.distal
peak_3261	0.603164	ATAC.distal
peak_3263	0.544621	ATAC.distal
peak_3264	0.694406	ATAC.distal
peak_3268	0.542592	ATAC.distal
peak_3269	0.787827	ATAC.distal
peak_3270	0.396465	ATAC.distal
peak_3271	0.842788	ATAC.distal
peak_3272	0.717756	ATAC.distal
peak_3273	0.74978	ATAC.distal
peak_3274	0.938393	ATAC.distal
peak_3275	0.717194	ATAC.distal
peak_3277	0.933906	ATAC.distal
peak_3278	0.803094	ATAC.distal
peak_3279	0.999904	ATAC.distal
peak_3280	0.959049	ATAC.distal
peak_3281	0.864667	ATAC.distal
peak_3282	0.882612	ATAC.distal
peak_3283	1.01346	ATAC.distal
peak_3284	0.98666	ATAC.distal
peak_3285	0.912039	ATAC.distal
peak_3286	0.421459	ATAC.distal
peak_3287	0.776148	ATAC.distal
peak_3288	0.804683	ATAC.distal
peak_3291	0.802329	ATAC.distal
peak_3295	1.08422	ATAC.distal
peak_3296	1.00483	ATAC.distal
peak_3297	0.84219	ATAC.distal
peak_3298	0.705069	ATAC.distal
peak_3299	0.84017	ATAC.distal
peak_3300	0.50626	ATAC.distal
peak_3301	0.742713	ATAC.distal
peak_3302	0.653539	ATAC.distal
peak_3303	0.810291	ATAC.distal
peak_3304	0.686097	ATAC.distal
peak_3305	0.591009	ATAC.distal
peak_3306	0.81794	ATAC.distal
peak_3307	0.854442	ATAC.distal
peak_3308	0.919313	ATAC.distal
peak_3310	0.85418	ATAC.distal
peak_3311	0.141027	ATAC.distal
peak_3312	0.614044	ATAC.distal
peak_3314	0.807383	ATAC.distal
peak_3317	0.754582	ATAC.distal
peak_3318	0.216133	ATAC.distal
peak_3319	0.995704	ATAC.distal
peak_3320	0.696497	ATAC.distal
peak_3321	0.671843	ATAC.distal
peak_3322	0.616833	ATAC.distal
peak_3324	0.81753	ATAC.distal
peak_3326	0.780957	ATAC.distal
peak_3327	0.538377	ATAC.distal
peak_3328	0.926123	ATAC.distal
peak_3329	0.917714	ATAC.distal
peak_3330	0.821114	ATAC.distal
peak_3331	0.681679	ATAC.distal
peak_3332	0.832859	ATAC.distal
peak_3333	0.732981	ATAC.distal
peak_3334	0.77167	ATAC.distal
peak_3335	1.23574	ATAC.distal
peak_3336	1.28935	ATAC.distal
peak_3337	1.33769	ATAC.distal
peak_3338	0.432114	ATAC.distal
peak_3339	0.801746	ATAC.distal
peak_3343	0.629508	ATAC.distal
peak_3344	0.31128	ATAC.distal
peak_3346	0.643695	ATAC.distal
peak_3348	0.721206	ATAC.distal
peak_3349	0.981019	ATAC.distal
peak_3350	0.792895	ATAC.distal
peak_3351	0.577733	ATAC.distal
peak_3352	0.719663	ATAC.distal
peak_3353	0.824906	ATAC.distal
peak_3354	0.643744	ATAC.distal
peak_3356	0.721187	ATAC.distal
peak_3357	0.624836	ATAC.distal
peak_3358	1.01509	ATAC.distal
peak_3360	0.777445	ATAC.distal
peak_3362	0.661272	ATAC.distal
peak_3363	1.08169	ATAC.distal
peak_3366	0.295025	ATAC.distal
peak_3370	0.648812	ATAC.distal
[truncated: 59,920 more rows]

## Sheet: maf_summary
peak_type	mean_maf
ATAC	0.0953742
ATAC_distal	0.0941077
ATAC_proximal	0.0964433
H3K27ac	0.0985152
H3K27ac_distal	0.0991765
H3K27ac_proximal	0.0980453
H3K4me3	0.0952359
tss_plusMinus500bp_plus_k4me3_with_gene_tss (promoters)	0.101042
		maf was calculated per base creating a file too large to present. We thus give here the averages across all features in a category
