# Supplementary material for: Cis -acting variation is common across regulatory layers but is often buffered during embryonic development
Source: HighWire-hosted journal article supplement (doi:10.1101/gr.266338.120), 2020-12-11
Supplement: SupplementalTables.zip [file Supplemental_Table_S3.xlsx]

## Sheet: README
Supplemental Table S3: Enriched signals in ATAC and H3K27ac peaks. For each set of peaks (ATAC without H3K27ac and H3K27ac without ATAC (orphans) and ATAC with H3K27ac and K27ac with ATAC (coupled)), we ran i-cisTarget to identify enriched ChIP-seq signals and motifs. Shown here are signals within the top 5% highest normalized enrichment scores (NES) in orphans and top 5% highest NES delta values…

## Sheet: ATAC
NES_orphan_atac	NES_coupled_atac	delta_NES	track
13.5994	15.4594	-1.85998	RNA polymerase II ChIP-seq on 16-20h embryos (E16-20 PolII ChIPSeq 1)
11.4117	13.5006	-2.08894	RNA polymerase II ChIP-seq on 8-12h embryos (E8-12 PolII ChIPSeq 1)
5.62819	2.48861	3.13958	Pc ChIP-seq on 12-24h embryos
5.47082	2.24186	3.22896	Pc ChIP-seq on 12-24h embryos
5.3138	2.10669	3.20711	Scm ChIP-seq on 12-24h embryos
5.2374	3.24562	1.99178	Pc ChIP-seq on 4-12h embryos
5.17688	2.30548	2.8714	ph-d ChIP-seq on 4-12h embryos
5.02997	-1.11977	6.14974	su(Hw) ChIP-seq on White prepupae
4.96608	2.58412	2.38196	Pc ChIP-seq on Temperature sensitive cells
4.93991	1.39378	3.54613	Psc ChIP-seq on 14-16h embryos
4.90481	2.38797	2.51685	E(z) ChIP-seq on 12-24h embryos
4.87119	-0.452924	5.32411	su(Hw) ChIP-seq on 14-16h embryos
4.85142	-0.875261	5.72668	su(Hw) ChIP-seq on 14-16h embryos
4.7803	2.55986	2.22044	Pc ChIP-seq on Kc167
4.75888	-0.524717	5.2836	mod(mdg4) ChIP-seq on S2
4.71596	2.16447	2.55149	E(z) ChIP-seq on 12-24h embryos
4.71095	1.08458	3.62638	Psc ChIP-seq on 14-16h embryos
4.5772	-0.665515	5.24271	mod(mdg4) ChIP-seq on S2
4.4771	-1.18753	5.66464	su(Hw) ChIP-seq on White prepupae
4.40732	-0.263529	4.67084	mod(mdg4) ChIP-seq on Kc167
4.35594	-0.470237	4.82618	su(Hw) ChIP-seq on 16-24h embryos
4.19715	2.2041	1.99305	Pc ChIP-seq on 14-16h embryos
4.15524	-0.850299	5.00554	su(Hw) ChIP-seq on S3
4.08299	-0.495337	4.57833	su(Hw) ChIP-seq on 16-24h embryos
4.04597	-1.13772	5.18369	su(Hw) ChIP-seq on White prepupae
4.02535	-0.954841	4.98019	su(Hw) ChIP-seq on Kc167
4.02522	-0.954786	4.98001	su(Hw) ChIP-seq on Kc167
3.9715	-0.665294	4.6368	su(Hw) ChIP-seq on Kc167
3.93728	0.713734	3.22355	Pc ChIP-seq on 16-18h embryos
3.90725	-0.506769	4.41402	su(Hw) ChIP-seq on 16-24h embryos
3.85964	-0.638151	4.49779	su(Hw) ChIP-seq on Kc167
3.76562	-0.88418	4.6498	su(Hw) ChIP-seq on Kc167
3.73582	6.06364	-2.32782	gro ChIP-seq on White prepupae
3.67641	-0.351862	4.02827	su(Hw) ChIP-seq on ML-DmBG3-c2
3.63911	-0.558792	4.1979	su(Hw) ChIP-seq on S2
3.61165	0.986577	2.62507	HDAC4 ChIP-seq on 0-12h embryos
3.60731	-0.722369	4.32968	su(Hw) ChIP-seq on S2
3.55365	1.22605	2.3276	Pc ChIP-seq on Kc167
3.5361	6.32346	-2.78736	vtd ChIP-seq on Kc167
3.5094	1.25556	2.25384	pho ChIP-seq on 4-12h embryos
3.45707	-0.22838	3.68545	eGFP-su(Hw) (embryonic: 0-24 hour)
3.44794	0.826822	2.62112	Rrp6 ChIP-seq on S2
3.38518	0.806639	2.57854	Rrp6 ChIP-seq on S2
3.36919	1.26327	2.10592	Pc ChIP-seq on 4-12h embryos
3.33221	1.17706	2.15516	pho ChIP-seq on 4-12h embryos
3.30842	-0.0329346	3.34136	pho ChIP-seq on 16-18h embryos
3.30535	0.265449	3.0399	mod(mdg4) ChIP-seq on Kc167
3.26727	-0.206039	3.47331	eGFP-su(Hw) (embryonic: 0-24 hour)
3.25313	1.03947	2.21366	SMC3 ChIP-seq on 3rd instar
3.22514	-0.194365	3.4195	eGFP-su(Hw) (embryonic: 0-24 hour)
3.04838	0.438277	2.6101	pho ChIP-seq on CNS and imaginal discs
3.04793	-0.194966	3.2429	mod(mdg4) ChIP-seq on Kc167
3.00928	-0.20256	3.21183	mod(mdg4) ChIP-seq on Kc167
2.95253	-0.149972	3.1025	eGFP-su(Hw) (embryonic: 0-24 hour)
2.93673	8.98243	-6.0457	hth ChIP-seq on 8-16h embryos
2.8955	0.720501	2.175	HDAC6 ChIP-seq on 0-12h embryos
2.62818	4.91139	-2.28321	H3K36me1 ChIP-seq on Adult head
2.56663	11.1095	-8.54286	Epitope tags ChIP-seq on Embryos
2.5628	6.57736	-4.01456	gt ChIP-seq on Blastoderm
2.54948	4.55429	-2.0048	gt ChIP-seq on Blastoderm
2.47534	5.62323	-3.14789	GFP ChIP-seq on White prepupae
2.2811	5.55957	-3.27847	GFP ChIP-seq on White prepupae
2.27969	4.85577	-2.57608	H3K36me1 ChIP-seq on Adult head
2.26129	5.95133	-3.69004	eGFP-Kr (embryonic: 0-10 hour)
2.25057	4.29335	-2.04279	H4K8ac ChIP-seq on 3rd instar
2.2442	4.59928	-2.35507	H2AK118ub ChIP-seq on Temperature sensitive cells
2.08277	4.91312	-2.83035	Orc2 ChIP-seq on 4-7h embryos
2.05597	4.16676	-2.1108	H3K36me1 ChIP-seq on 14-16h embryos
2.05163	4.41939	-2.36776	Orc2 ChIP-seq on 4-7h embryos
2.04932	5.32253	-3.2732	Kr ChIP-seq on Blastoderm
2.04851	5.44052	-3.39201	eGFP-Kr (embryonic: 0-10 hour)
2.00702	3.88032	-1.8733	Orc2 ChIP-seq on 4-7h embryos
1.99293	4.49091	-2.49798	eGFP-Kr (embryonic: 0-10 hour)
1.85278	3.92041	-2.06763	H3K36me1 ChIP-seq on 14-16h embryos
1.84474	5.30389	-3.45915	twi ChIP-seq on 2-4h embryos
1.77811	3.74844	-1.97032	vfl ChIP-seq on Embryos
1.7312	5.46197	-3.73078	twi ChIP-seq on 2-4h embryos
1.6995	5.44786	-3.74836	gt ChIP-seq on Blastoderm
1.646	5.03806	-3.39206	pan ChIP-seq on 0-8h embryos
1.62547	10.3597	-8.73423	hth ChIP-seq on 0-8h embryos
1.56033	4.06513	-2.50479	vfl ChIP-seq on Mitotic cycle 14
1.55299	9.94664	-8.39365	hth ChIP-seq on 0-8h embryos
1.47672	10.4151	-8.93834	hth ChIP-seq on 0-8h embryos
1.44021	4.30505	-2.86484	twi ChIP-seq on 2-4h embryos
1.4134	3.31123	-1.89783	H3K18ac ChIP-seq on 14-16h embryos
1.40579	4.34578	-2.93999	twi ChIP-seq on 2-4h embryos
1.38646	3.80666	-2.42021	Epitope tags ChIP-seq on S2
1.36951	3.54905	-2.17954	vfl ChIP-seq on Mitotic cycle 13-14
1.32749	3.35175	-2.02426	bcd ChIP-seq on 1-3h embryos
1.30621	6.35601	-5.0498	GFP ChIP-seq on 0-6h embryos
1.27029	4.40454	-3.13425	GFP ChIP-seq on White prepupae
1.26273	4.75092	-3.48819	Epitope tags ChIP-seq on Embryos
1.22265	3.33554	-2.11289	bcd ChIP-seq on 1-3h embryos
1.17276	3.04359	-1.87083	GFP ChIP-seq on White prepupae
1.05929	4.25541	-3.19612	twi ChIP-seq on 2-4h embryos
0.973809	3.15421	-2.1804	Su(H) ChIP-seq on 0-8h embryos
0.913227	5.0155	-4.10228	usp ChIP-seq on 0-12h embryos
0.885197	4.84317	-3.95797	usp ChIP-seq on 0-12h embryos
0.803818	4.6059	-3.80208	HDAC4 ChIP-seq on 0-12h embryos
0.665267	3.18657	-2.52131	usp ChIP-seq on 0-12h embryos
0.658755	2.79743	-2.13867	Epitope tags ChIP-seq on S2
0.607911	2.96225	-2.35434	Stat92E ChIP-seq on 0-12h embryos
0.240084	3.42429	-3.18421	cad ChIP-seq on 0-4h embryos
-0.519455	3.60645	-4.12591	Ubx ChIP-seq on 0-12h embryos

## Sheet: H3K27ac
NES_orphans_k27ac	NES_coupled_k27ac	delta_NES	track
9.20664	-0.210913	9.41755	elav ChIP-seq on 10-12h embryos
8.14793	4.30952	3.8384	gt ChIP-seq on Blastoderm
7.31566	0.461832	6.85382	RNA polymerase II ChIP-seq on Ovary (Ovary shWhite Rep2 H3K9me3; Drosophila melanogaster; ChIP-Seq)
7.1073	0.568656	6.53864	elav ChIP-seq on 10-12h embryos
7.03346	3.12843	3.90503	Pc ChIP-seq on 14-16h embryos
5.88951	1.0171	4.87241	eGFP-CG8359 (embryonic: 0-14 hour)
5.78217	2.60935	3.17282	RNA polymerase II ChIP-seq on Dorsal mesothoracic disc (Cl8-PolII ChipSeq IP1 extraction1 seq1 aliquote 1)
5.73022	1.60863	4.12158	Kr ChIP-seq on Blastoderm
5.67622	-0.462195	6.13841	elav ChIP-seq on 10-12h embryos
5.61241	3.33203	2.28038	H3K27me3 ChIP-seq on Parasegment 5
5.51968	2.62325	2.89643	E(z) ChIP-seq on 12-24h embryos
5.40411	3.32393	2.08018	H3K27me3 ChIP-seq on Parasegment 6
5.38739	-0.337796	5.72519	RpII215 ChIP-seq on Embryos (2-3h wt Pol II ChIP-seq rep1; Drosophila melanogaster; ChIP-Seq)
5.33839	3.20536	2.13302	H3K27me3 ChIP-seq on Parasegment 6
5.33098	2.48926	2.84172	Pc ChIP-seq on 14-16h embryos
5.31945	3.07787	2.24159	H3K27me3 ChIP-seq on 4-12h embryos
5.29176	3.29536	1.9964	H3K27me3 ChIP-seq on Parasegment 4
5.20332	0.66871	4.53461	eGFP-CG8359 (embryonic: 0-14 hour)
5.16698	0.8179	4.34908	bcd ChIP-seq on Blastoderm
5.12954	2.93572	2.19381	H3K27me3 ChIP-seq on 5-13h embryos
5.08847	3.27881	1.80965	H3K27me3 ChIP-seq on 8-12h embryos
5.00366	0.164603	4.83906	RNA polymerase II ChIP-seq on Testis (bam PolII ChIP-seq)
4.97842	3.029	1.94942	H3K27me3 ChIP-seq on 5-13h embryos
4.88906	2.91632	1.97274	H3K27me3 ChIP-seq on Parasegment 7
4.87257	0.515556	4.35701	eGFP-CG8359 (embryonic: 0-14 hour)
4.77295	2.75388	2.01906	H3K27me3 ChIP-seq on 4-8h embryos
4.73098	2.71852	2.01246	H3K27me3 ChIP-seq on 6-8h embryos
4.73025	2.98421	1.74605	H3K27me3 ChIP-seq on Embryos
4.72384	2.76204	1.96181	H3K27me3 ChIP-seq on Parasegment 7
4.66967	2.47434	2.19532	E(z) ChIP-seq on 12-24h embryos
4.65577	2.54828	2.10749	Pc ChIP-seq on Parasegment 7
4.51548	1.67326	2.84222	elav ChIP-seq on 10-12h embryos
4.44444	1.82441	2.62003	hb ChIP-seq on Blastoderm
4.35516	2.67364	1.68151	H3K27me3 ChIP-seq on 0-4h embryos
4.27025	1.50858	2.76167	RNA polymerase II ChIP-seq on 1-2h embryos (ChIP-seq Pol II in pre-MBT embryos (replicate 1); Drosophila melanogaster; ChIP-Seq)
4.18103	-0.536275	4.7173	H1 ChIP-seq on 3rd instar
4.03442	1.87693	2.15749	Su(z)12 ChIP-seq on 5-13h embryos
3.96881	-1.49937	5.46818	Hnf4 ChIP-seq on Adult body
3.91144	2.02902	1.88242	Su(z)12 ChIP-seq on Parasegment 7
3.8834	0.314932	3.56847	RpII215 ChIP-seq on Embryos (2-3h wt Pol II ChIP-seq rep2; Drosophila melanogaster; ChIP-Seq)
3.88057	1.65009	2.23047	RNA polymerase II ChIP-seq on 1-2h embryos (ChIP-seq Pol II in pre-MBT embryos (replicate 2); Drosophila melanogaster; ChIP-Seq)
3.75145	-0.0461719	3.79763	Stat92E ChIP-seq on Intestines
3.69901	-0.272973	3.97199	H1 ChIP-seq on 3rd instar
3.68516	1.65515	2.03001	RNA polymerase II ChIP-seq on 1-2h embryos (ChIP-seq Pol II in pre-MBT embryos (replicate 4); Drosophila melanogaster; ChIP-Seq)
3.63944	1.47504	2.1644	pho ChIP-seq on 4-12h embryos
3.61595	-1.39231	5.00826	Hnf4 ChIP-seq on Adult body
3.5914	-1.26602	4.85741	Hnf4 ChIP-seq on Adult body
3.57625	0.262863	3.31339	RNA polymerase II ChIP-seq on Mitotic cycle 12 (WT NC12-pSer5; Drosophila melanogaster; ChIP-Seq)
3.55295	1.87623	1.67671	Pc ChIP-seq on 5-13h embryos
3.5194	1.60262	1.91678	pan ChIP-seq on White prepupae
3.49208	0.819694	2.67239	eGFP-tj (adult: unknown )
3.47635	0.819543	2.65681	pho ChIP-seq on CNS and imaginal discs
3.36105	0.812235	2.54881	eGFP-tj (adult: unknown )
3.35252	0.632929	2.71959	Stat92E ChIP-seq on White prepupae
3.31933	1.56643	1.7529	pho ChIP-seq on 4-12h embryos
3.29977	1.04189	2.25788	bcd ChIP-seq on Blastoderm
3.28187	0.929599	2.35227	eGFP-tj (adult: unknown )
3.27363	1.13557	2.13806	Acf ChIP-seq on 0-12h embryos
3.19852	-0.0760525	3.27458	sc ChIP-seq on 0-12h embryos
3.15727	0.732857	2.42441	CDC45L ChIP-seq on Egg chamber
3.14138	0.615275	2.52611	eGFP-tj (adult: unknown )
3.08514	-1.46789	4.55303	Su(var)205 ChIP-seq on Ovary
3.08002	0.397066	2.68295	Epitope tags ChIP-seq on S2
3.05084	0.541812	2.50903	Epitope tags ChIP-seq on S2
3.03193	0.401416	2.63052	Epitope tags ChIP-seq on S2
3.0303	0.421516	2.60879	RNA polymerase II ChIP-seq on Mitotic cycle 13 (mei-41 NC13-pSer5; Drosophila melanogaster; ChIP-Seq)
2.97389	-1.2837	4.2576	Hnf4 ChIP-seq on Adult body
2.97038	0.492051	2.47833	Epitope tags ChIP-seq on S2
