# Supplementary material for: Cis -acting variation is common across regulatory layers but is often buffered during embryonic development
Source: HighWire-hosted journal article supplement (doi:10.1101/gr.266338.120), 2020-12-11
Supplement: SupplementalTables.zip [file Supplemental_Table_S4.xlsx]

## Sheet: README
Supplemental Table S4: Evolutionary contrasts between proximal and distal features. Shown here are values of pi (average pairwise genetic distance), phyloP, phyloP_SPH (or estimated number of substitutions across the 12 species Drosophila phylogeny), and minor allele frequency (MAF) for proximal and distal peaks of ATAC and H3K27ac along with the p-values for a Wilcoxon test comparing them.

## Sheet: proximal_vs_distal_contrasts
Statistic		Proximal	Distal	p-value
pi_per_base	ATAC	0.133415	0.130092	1.629e-06
	K27ac	0.131079	0.126969	1.249e-05
	Both	0.132481	0.128856	1.013e-10
		Proximal	Distal	p-value
phyloP_SPH	ATAC	2.86186	2.73011	2.2e-16
(substitutions per site)	K27ac	3.00726	2.94742	7.054e-09
	Both	2.89609	2.83976	2.2e-16
		Proximal	Distal	p-value
phyloP	ATAC	0.553209	0.635876	2.2e-16
(lower is less conserved)	K27ac	0.454541	0.443015	0.01038
	Both	0.513731	0.559571	2.2e-16
Minor Allele Frequency (MAF)		Proximal	Distal	p-value
	ATAC	0.0964433	0.0941077	2.2e-16
	K27ac	0.0991765	0.0980453	6.562e-05
	Both	0.0971986	0.0962816	1.064e-06
