# Supplementary material for: Cis -acting variation is common across regulatory layers but is often buffered during embryonic development
Source: HighWire-hosted journal article supplement (doi:10.1101/gr.266338.120), 2020-12-11
Supplement: SupplementalTables.zip [file Supplemental_Table_S5.xlsx]

## Sheet: README
Supplemental Table S5: Categorical enrichment values of phyloP, pi (average pairwise genetic distance), SPH (estimated number of substitutions across the 12 species Drosophila phylogeny), minor allele frequency (MAF), and allelic imbalance for genes and non-coding features. Enrichment of evolutionary measures was done using a rank-biserial correlation test. Enrichment for allelic imbalance (signi…

## Sheet: phyloP
acc	cat name	r_rb	mw_pz	qvalue	regulatory layer
GD:00177	The Divalent Anion:Na+ Symporter (DASS) Family	-0.516316	0.00302	0.00518142	ATAC
GD:00151	The Annexin (Annexin) Family	-0.508309	0.00537	0.00821187	ATAC
GD:00101	Homeobox|zf-C2H2	-0.414132	0.00235	0.0076096	K27ac
GD:00067	RHD|TIG	-0.382177	0.00392	0.00629896	ATAC
GD:00021	Myb_DNA-binding	-0.321041	0.00197	0.00364677	ATAC
GD:00170	The Amino Acid-Polyamine-Organocation (APC) Family	-0.284998	0.00094	0.00200373	ATAC
GD:00122	INSULIN signaling pathway	-0.282205	0	0	ATAC
GD:00138	Core	-0.272819	0	0	ATAC
GD:00140	JAK/STAT signaling pathway	-0.270194	0.00394	0.00629896	ATAC
GD:00028	AT_hook	-0.247002	0.0084	0.0123102	ATAC
GD:00152	The P-type ATPase (P-ATPase) Superfamily	-0.231275	0.00058	0.00231634	K27ac
GD:00152	The P-type ATPase (P-ATPase) Superfamily	-0.226652	0.00018	0.000408447	ATAC
GD:00136	Circadian Clock pathway	-0.21428	0	0	ATAC
noCat	unclassified or without annotation	-0.20412	0	0	K4me3
GD:00160	The Major Facilitator Superfamily (MFS)	-0.201657	0	0	K27ac
GD:00111	GPCR	-0.200628	0.00434	0.0139968	K4me3
GD:00146	The ATP-binding Cassette (ABC) Superfamily	-0.186246	7e-05	0.000164135	ATAC
GD:00137	NCore	-0.178006	0.00588	0.00880045	ATAC
GD:00160	The Major Facilitator Superfamily (MFS)	-0.164106	0	0	ATAC
GD:00031	bZIP	-0.14366	0.00169	0.00330225	ATAC
GD:00145	ATP-Dependent	-0.131965	2e-05	5.41106e-05	ATAC
GD:00114	Protein Phosphatase	-0.126616	7e-05	0.000164135	ATAC
GD:00149	Secondary Transporter	-0.114684	0	0	ATAC
GD:00111	GPCR	-0.109424	0.00081	0.00313054	K27ac
GD:00144	transporter	-0.0939219	0	0	ATAC
GD:00112	phosphatase	-0.088418	0.00051	0.0011211	ATAC
noCat	unclassified or without annotation	-0.0878895	0	0	K27ac
GD:00106	kinase	-0.0865155	0	0	ATAC
GD:00108	Non-protein Kinase	-0.0863882	0.00977	0.0140257	ATAC
GD:00149	Secondary Transporter	-0.0852945	0.00089	0.00323126	K27ac
GD:00107	Protein Kinase	-0.0843997	0	0	ATAC
GD:00002	transmembrane	-0.0747337	0	0	ATAC
GD:00116	metabolism	-0.073795	0	0	ATAC
GD:00117	enzyme	-0.068163	0	0	ATAC
GD:00001	glycoprotein	-0.0482985	0.00186	0.0035362	ATAC
GD:00118	other	-0.0475341	0.00259	0.00455476	ATAC
GD:00143	conservedBilaterian	0.0534312	0.00056	0.00231359	K27ac
GD:00118	other	0.057215	0.00479	0.0147152	K27ac
GD:00116	metabolism	0.0714094	0.00023	0.0010472	K4me3
GD:00012	zf-C2H2	0.0765272	2e-05	5.41106e-05	ATAC
GD:00117	enzyme	0.0768714	0.00026	0.00107144	K4me3
GD:00005	cytoskeletal	0.0951361	0.00049	0.00185442	K4me3
GD:00143	conservedBilaterian	0.0962174	8e-05	0.000456471	K4me3
GD:00018	HLH	0.100497	0.00411	0.00642473	ATAC
GD:00115	ubiquitin_related	0.100702	0.00056	0.00197804	K4me3
GD:00105	rna_binding	0.103608	0	0	K27ac
GD:00105	rna_binding	0.103998	0	0	ATAC
GD:00006	mitochondrial	0.105894	0	0	K27ac
GD:00120	major_signalling_pathway	0.107122	0.0005	0.00185442	K4me3
GD:00070	zf-C4	0.112949	0.00248	0.00447314	ATAC
GD:00012	zf-C2H2	0.115819	0	0	K27ac
GD:00011	DNA-binding with transcription factor activity	0.12308	0	0	K27ac
GD:00005	cytoskeletal	0.124635	0	0	K27ac
GD:00007	TF_dnabind	0.125141	0	0	ATAC
GD:00007	TF_dnabind	0.128177	0	0	K27ac
GD:00115	ubiquitin_related	0.129042	0	0	K27ac
GD:00034	HMG_box	0.129053	0.00355	0.00594572	ATAC
GD:00011	DNA-binding with transcription factor activity	0.130049	0	0	ATAC
GD:00129	receptor	0.130343	0.0062	0.0185707	K27ac
GD:00025	Co-factor	0.130364	0.00167	0.00330225	ATAC
GD:00123	EGFR and PVR RTK signaling pathway	0.136299	0.00103	0.00362956	K27ac
GD:00120	major_signalling_pathway	0.138969	0	0	K27ac
GD:00011	DNA-binding with transcription factor activity	0.143077	0	0	K4me3
GD:00127	WNT signaling pathway	0.15167	0.00052	0.00222506	K27ac
GD:00007	TF_dnabind	0.152953	0	0	K4me3
GD:00132	Planar Cell Polarity pathway	0.153777	0.00085	0.00318247	K27ac
GD:00105	rna_binding	0.156731	0	0	K4me3
GD:00006	mitochondrial	0.16982	0	0	K4me3
GD:00015	Homeobox	0.172565	0	0	K27ac
GD:00128	NOTCH signaling pathway	0.18123	3e-05	7.81597e-05	ATAC
GD:00025	Co-factor	0.192215	0.00019	0.000910561	K27ac
GD:00121	FGFR signaling pathway	0.202586	0	0	K27ac
GD:00103	ribosome	0.205926	0	0	K27ac
GD:00126	ligand	0.226903	0	0	ATAC
GD:00128	NOTCH signaling pathway	0.227776	3e-05	0.000163378	K27ac
GD:00015	Homeobox	0.240037	2e-05	0.000148353	K4me3
GD:00110	nuclear_encoded_oxidative_phos	0.254635	0.00024	0.0010472	K4me3
GD:00158	The Voltage-gated Ion Channel (VIC) Superfamily	0.266915	0.00049	0.00217434	K27ac
GD:00075	GATA	0.268515	0.00128	0.00264823	ATAC
GD:00025	Co-factor	0.283279	0.00015	0.000794749	K4me3
GD:00026	Ets	0.2926	0	0	ATAC
GD:00139	HIPPO signaling pathway	0.297352	7e-05	0.000364641	K27ac
GD:00126	ligand	0.307146	0	0	K27ac
GD:00135	HEDGEHOG signaling pathway	0.323126	0.00025	0.00115203	K27ac
GD:00015	Homeobox	0.326084	0	0	ATAC
GD:00075	GATA	0.342728	0.00012	0.000599054	K27ac
GD:00018	HLH	0.342847	0.00018	0.000890119	K4me3
GD:00037	T-box	0.352095	0	0	ATAC
GD:00026	Ets	0.364105	0.00163	0.00542476	K27ac
GD:00103	ribosome	0.374973	0	0	K4me3
GD:00037	T-box	0.37952	0	0	K27ac
GD:00077	CP2	0.410111	0.00259	0.00816605	K27ac
GD:00153	The H+- or Na+-translocating F-type, V-type and A-type ATPase (F-ATPase) Superfamily	0.411186	4e-05	0.000247255	K4me3
GD:00020	Homeobox|Pou	0.428759	0	0	K27ac
GD:00104	proteasome	0.453258	0	0	K4me3
GD:00020	Homeobox|Pou	0.502714	0	0	ATAC

## Sheet: pi
acc	cat name	r_rb	mw_pz	qvalue	regulatory layer
GD:00159	The Ca2+:Cation Antiporter (CaCA) Family	-0.674098	0	0	K27ac
GD:00067	RHD|TIG	-0.53705	5e-05	0.000213176	ATAC
GD:00060	PAX	-0.51908	0	0	ATAC
GD:00101	Homeobox|zf-C2H2	-0.490168	0.00022	0.000691139	ATAC
GD:00169	The Mitochondrial Protein Translocase (MPT) Family	-0.466044	0.00177	0.0106275	K27ac
GD:00067	RHD|TIG	-0.377959	0.00107	0.00900632	K27ac
GD:00028	AT_hook	-0.33569	0.00934	0.0403771	K27ac
GD:00028	AT_hook	-0.276808	0.00314	0.0064629	ATAC
GD:00070	zf-C4	-0.227585	0	0	ATAC
GD:00141	Nuclear hormone receptor	-0.190238	0	0	ATAC
noCat	unclassified or without annotation	-0.185664	0	0	K4me3
GD:00165	The Neurotransmitter Receptor, Cys loop, Ligand-gated Ion Channel (LIC) Family	-0.179177	0.00689	0.0124495	ATAC
GD:00025	Co-factor	-0.157116	0.00015	0.00049741	ATAC
GD:00004	autophagy	-0.110857	2e-05	0.000720505	K27ac
GD:00018	HLH	-0.107202	0.00221	0.00507359	ATAC
GD:00107	Protein Kinase	-0.102476	0	0	ATAC
GD:00106	kinase	-0.0868939	0	0	ATAC
GD:00107	Protein Kinase	-0.0845495	4e-05	0.000864606	K27ac
GD:00106	kinase	-0.0770487	3e-05	0.000810568	K27ac
GD:00105	rna_binding	-0.0751639	0	0	ATAC
GD:00105	rna_binding	-0.0555229	0.00118	0.00900632	K27ac
GD:00015	Homeobox	-0.052132	0.00823	0.0132768	ATAC
GD:00011	DNA-binding with transcription factor activity	-0.0518236	0	0	ATAC
GD:00007	TF_dnabind	-0.0517449	0	0	ATAC
GD:00109	receptors	-0.050149	8e-05	0.000298446	ATAC
noCat	unclassified or without annotation	-0.0430118	0	0	K27ac
GD:00002	transmembrane	0.0347958	9e-05	0.00138955	K27ac
GD:00005	cytoskeletal	0.0350357	0.0073	0.0124495	ATAC
GD:00116	metabolism	0.0362892	0.00052	0.00155192	ATAC
GD:00117	enzyme	0.0367857	0.00146	0.0036311	ATAC
GD:00116	metabolism	0.0407184	0.00163	0.0103626	K27ac
GD:00002	transmembrane	0.0427981	0	0	ATAC
GD:00117	enzyme	0.0435294	0.00213	0.0121159	K27ac
GD:00144	transporter	0.0498088	0.00107	0.00298446	ATAC
GD:00001	glycoprotein	0.0504639	0.00115	0.00298446	ATAC
GD:00144	transporter	0.0539418	0.00395	0.0185608	K27ac
GD:00005	cytoskeletal	0.0654596	9e-05	0.00138955	K27ac
GD:00149	Secondary Transporter	0.0755931	0.00323	0.016064	K27ac
GD:00006	mitochondrial	0.0770833	0	0	ATAC
GD:00003	peroxisomal	0.0797397	0.00751	0.0124518	ATAC
GD:00002	transmembrane	0.0856655	0	0	K4me3
GD:00149	Secondary Transporter	0.0884936	4e-05	0.000183659	ATAC
GD:00116	metabolism	0.0998454	0	0	K4me3
GD:00121	FGFR signaling pathway	0.111698	0.00792	0.035665	K27ac
GD:00117	enzyme	0.115744	0	0	K4me3
GD:00008	Maybe TF	0.11948	0.00114	0.00900632	K27ac
GD:00006	mitochondrial	0.121681	0	0	K4me3
GD:00103	ribosome	0.127386	0.00154	0.0103626	K27ac
GD:00146	The ATP-binding Cassette (ABC) Superfamily	0.133455	0.00447	0.0088937	ATAC
GD:00003	peroxisomal	0.134054	0.00028	0.00336236	K27ac
GD:00103	ribosome	0.146856	7e-05	0.00027855	ATAC
GD:00126	ligand	0.158073	0.00012	0.00162114	K27ac
GD:00132	Planar Cell Polarity pathway	0.158175	0.0006	0.00648455	K27ac
GD:00138	Core	0.170758	0.003	0.00639528	ATAC
GD:00037	T-box	0.189565	0.00539	0.0103782	ATAC
GD:00103	ribosome	0.201579	1e-05	0.00014581	K4me3
GD:00138	Core	0.31069	0.00125	0.00900632	K27ac
GD:00166	The Amino Acid/Auxin Permease (AAAP) Family	0.316947	0.00191	0.00456026	ATAC
GD:00166	The Amino Acid/Auxin Permease (AAAP) Family	0.340829	0.00262	0.0141579	K27ac
GD:00155	The Anion Channel-forming Bestrophin (Bestrophin) Family	0.398815	0.00976	0.04057	K27ac
GD:00156	The Major Intrinsic Protein (MIP) Family	0.400246	0.00727	0.0124495	ATAC
GD:00176	The Epithelial Na+ Channel (ENaC) Family	0.405086	0.00012	0.000421336	ATAC
GD:00084	Runt	0.551689	0.00093	0.00900632	K27ac
GD:00027	SANT	0.651886	0.00568	0.0105948	ATAC

## Sheet: SPH
acc	cat name	r_rb	mw_pz	qvalue	regulatory layer
GD:00020	Homeobox|Pou	-0.476943	0	0	ATAC
GD:00037	T-box	-0.361831	0	0	ATAC
GD:00020	Homeobox|Pou	-0.355162	3e-05	0.000208112	K27ac
GD:00104	proteasome	-0.354273	0.00013	0.00139533	K4me3
GD:00015	Homeobox	-0.351084	0	0	ATAC
GD:00026	Ets	-0.33175	0.00409	0.0145501	K27ac
GD:00037	T-box	-0.329371	1e-05	8.16127e-05	K27ac
GD:00026	Ets	-0.317793	0	0	ATAC
GD:00135	HEDGEHOG signaling pathway	-0.305384	0.00053	0.00253562	K27ac
GD:00075	GATA	-0.293725	0.00099	0.00416225	K27ac
GD:00153	The H+- or Na+-translocating F-type, V-type and A-type ATPase (F-ATPase) Superfamily	-0.29244	0.00369	0.0247537	K4me3
GD:00075	GATA	-0.266501	0.0014	0.0041834	ATAC
GD:00103	ribosome	-0.264432	0	0	K4me3
GD:00158	The Voltage-gated Ion Channel (VIC) Superfamily	-0.252082	0.00099	0.00416225	K27ac
GD:00126	ligand	-0.227269	0	0	K27ac
GD:00139	HIPPO signaling pathway	-0.209899	0.00492	0.016649	K27ac
GD:00126	ligand	-0.199087	0	0	ATAC
GD:00135	HEDGEHOG signaling pathway	-0.189477	0.00574	0.0151226	ATAC
GD:00015	Homeobox	-0.184812	0.00113	0.00808577	K4me3
GD:00103	ribosome	-0.183287	1e-05	8.16127e-05	K27ac
GD:00121	FGFR signaling pathway	-0.158971	0.00016	0.000887946	K27ac
GD:00128	NOTCH signaling pathway	-0.154981	0.00038	0.00122756	ATAC
GD:00128	NOTCH signaling pathway	-0.154588	0.0049	0.016649	K27ac
GD:00070	zf-C4	-0.138768	0.0002	0.000683005	ATAC
GD:00015	Homeobox	-0.131941	0	0	K27ac
GD:00132	Planar Cell Polarity pathway	-0.122565	0.00785	0.0253284	K27ac
GD:00011	DNA-binding with transcription factor activity	-0.119191	0	0	ATAC
GD:00007	TF_dnabind	-0.112337	0	0	ATAC
noCat	unclassified or without annotation	-0.109727	0	0	K4me3
GD:00115	ubiquitin_related	-0.0980108	0	0	K27ac
GD:00105	rna_binding	-0.0969236	0	0	ATAC
GD:00018	HLH	-0.0938349	0.00738	0.017642	ATAC
GD:00120	major_signalling_pathway	-0.0857363	0	0	K27ac
GD:00006	mitochondrial	-0.0856183	4e-05	0.000536666	K4me3
GD:00012	zf-C2H2	-0.0850406	0	0	ATAC
GD:00012	zf-C2H2	-0.0843006	0.0002	0.00106724	K27ac
GD:00006	mitochondrial	-0.0741779	0	0	K27ac
GD:00005	cytoskeletal	-0.0708663	2e-05	0.000154157	K27ac
GD:00105	rna_binding	-0.0662276	0.00011	0.000635899	K27ac
GD:00007	TF_dnabind	-0.0645652	0	0	K27ac
GD:00011	DNA-binding with transcription factor activity	-0.0590586	0	0	K27ac
noCat	unclassified or without annotation	-0.0392111	0	0	K27ac
GD:00109	receptors	0.0491062	0.00205	0.00790056	K27ac
GD:00118	other	0.0596793	0.00015	0.00052732	ATAC
GD:00117	enzyme	0.0639606	0	0	ATAC
GD:00001	glycoprotein	0.0642908	3e-05	0.000112055	ATAC
GD:00106	kinase	0.0650395	0.00041	0.00203157	K27ac
GD:00116	metabolism	0.073698	0	0	ATAC
GD:00002	transmembrane	0.0739316	0	0	ATAC
GD:00112	phosphatase	0.0766612	0.00257	0.00749223	ATAC
GD:00002	transmembrane	0.0796855	0	0	K27ac
GD:00004	autophagy	0.0808835	0.00194	0.00769025	K27ac
GD:00107	Protein Kinase	0.0819165	7e-05	0.000441451	K27ac
GD:00144	transporter	0.0908585	0.00453	0.0286012	K4me3
GD:00108	Non-protein Kinase	0.0946744	0.00463	0.0128699	ATAC
GD:00144	transporter	0.0973829	0	0	K27ac
GD:00004	autophagy	0.10149	0.0065	0.0367193	K4me3
GD:00106	kinase	0.104704	0	0	ATAC
GD:00107	Protein Kinase	0.105023	0	0	ATAC
GD:00144	transporter	0.106469	0	0	ATAC
GD:00114	Protein Phosphatase	0.114279	0.00035	0.00116206	ATAC
GD:00149	Secondary Transporter	0.119936	0	0	ATAC
GD:00031	bZIP	0.126182	0.00582	0.0151226	ATAC
GD:00106	kinase	0.128095	1e-05	0.000153333	K4me3
GD:00002	transmembrane	0.13126	0	0	K4me3
GD:00111	GPCR	0.133263	5e-05	0.000330337	K27ac
GD:00109	receptors	0.134204	1e-05	0.000153333	K4me3
GD:00119	secreted	0.136798	0.0006	0.00495384	K4me3
GD:00149	Secondary Transporter	0.140469	0	0	K27ac
GD:00145	ATP-Dependent	0.143888	0.00021	0.0010791	K27ac
GD:00001	glycoprotein	0.147304	5e-05	0.000596296	K4me3
GD:00107	Protein Kinase	0.14893	1e-05	0.000153333	K4me3
GD:00160	The Major Facilitator Superfamily (MFS)	0.158133	1e-05	3.85567e-05	ATAC
GD:00124	TF	0.161912	0	0	ATAC
GD:00137	NCore	0.168417	0.00916	0.0214678	ATAC
GD:00136	Circadian Clock pathway	0.197167	0	0	ATAC
GD:00145	ATP-Dependent	0.204158	0	0	ATAC
GD:00146	The ATP-binding Cassette (ABC) Superfamily	0.238052	0	0	ATAC
GD:00160	The Major Facilitator Superfamily (MFS)	0.242257	0	0	K27ac
GD:00138	Core	0.25182	1e-05	3.85567e-05	ATAC
GD:00111	GPCR	0.257269	0.00025	0.00223611	K4me3
GD:00170	The Amino Acid-Polyamine-Organocation (APC) Family	0.258847	0.00265	0.00754151	ATAC
GD:00069	E2F_TDP	0.283246	0.00633	0.0157625	ATAC
GD:00122	INSULIN signaling pathway	0.28433	0	0	ATAC
GD:00146	The ATP-binding Cassette (ABC) Superfamily	0.292877	0.00483	0.0288011	K4me3
GD:00154	The Neurotransmitter:Sodium Symporter (NSS) Family	0.294921	0.00691	0.0228263	K27ac
GD:00028	AT_hook	0.328717	0.00045	0.00137914	ATAC
GD:00204	The Cation Diffusion Facilitator (CDF) Family	0.353268	0.00945	0.0217215	ATAC
GD:00060	PAX	0.353381	0.00044	0.00137914	ATAC
GD:00152	The P-type ATPase (P-ATPase) Superfamily	0.368108	0	0	K27ac
GD:00159	The Ca2+:Cation Antiporter (CaCA) Family	0.375179	0.00368	0.013436	K27ac
GD:00060	PAX	0.381122	0.00077	0.00344616	K27ac
GD:00152	The P-type ATPase (P-ATPase) Superfamily	0.385137	0	0	ATAC
GD:00152	The P-type ATPase (P-ATPase) Superfamily	0.396596	0.001	0.00766666	K4me3
GD:00177	The Divalent Anion:Na+ Symporter (DASS) Family	0.478079	0.00604	0.0153603	ATAC
GD:00151	The Annexin (Annexin) Family	0.49308	0.00693	0.0169044	ATAC
GD:00101	Homeobox|zf-C2H2	0.960071	0	0	K27ac
GD:00101	Homeobox|zf-C2H2	0.966689	0	0	ATAC
GD:00064	CUT|Homeobox	0.981321	0.00068	0.00314481	K27ac
GD:00064	CUT|Homeobox	0.985419	0.00014	0.000507079	ATAC

## Sheet: maf_atac
acc	cat name	r_rb	mw_pz
GD:00168	The Mitochondrial Tricarboxylate Carrier (MTC) Family	-0.77314	0.18055
GD:00081	TIG	-0.72374	0.02993
GD:00191	The Dicarboxylate/Amino Acid:Cation (Na+ or H+) Symporter (DAACS) Family	-0.675835	0.09785
GD:00076	GCM	-0.642252	0.0261
GD:00194	The Inward Rectifier K+ Channel (IRK-C) Family	-0.639248	0.11741
GD:00052	zf-NF-X1	-0.543213	0.1032
GD:00059	zf-C2HC	-0.525264	0.02586
GD:00172	The Reduced Folate Carrier (RFC) Family	-0.489404	0.39664
GD:00157	The Polycystin Cation Channel (PCC) Family	-0.439452	0.44658
GD:00036	CBF-beta	-0.424477	0.46222
GD:00155	The Anion Channel-forming Bestrophin (Bestrophin) Family	-0.366156	0.05713
GD:00175	The Proton-dependent Oligopeptide Transporter (POT) Family	-0.339297	0.18886
GD:00156	The Major Intrinsic Protein (MIP) Family	-0.285272	0.06455
GD:00179	The Sulfate Permease (SulP) Family	-0.276241	0.03708
GD:00174	The Lysosomal Cystine Transporter (LCT) Family	-0.230467	0.68977
GD:00166	The Amino Acid/Auxin Permease (AAAP) Family	-0.21567	0.03764
GD:00138	Core	-0.194887	0.00085
GD:00031	bZIP	-0.175079	0.00024
GD:00176	The Epithelial Na+ Channel (ENaC) Family	-0.174753	0.09752
GD:00026	Ets	-0.123837	0.05242
GD:00192	The Equilibrative Nucleoside Transporter (ENT) Family	-0.12033	0.71812
GD:00021	Myb_DNA-binding	-0.117946	0.2556
GD:00027	SANT	-0.114248	0.62792
GD:00187	The Chloride Carrier/Channel (ClC) Family	-0.0991798	0.76607
GD:00084	Runt	-0.0967061	0.48993
GD:00130	TGF beta signaling pathway	-0.0960016	0.15036
GD:00103	ribosome	-0.0916902	0.01426
GD:00193	The Gap Junction-forming Innexin (Innexin) Family	-0.0873549	0.38501
GD:00203	The Zinc (Zn2+)-Iron (Fe2+) Permease (ZIP) Family	-0.0871739	0.73567
GD:00062	RFX_DNA_binding	-0.082562	0.66797
GD:00171	The Drug/Metabolite Transporter (DMT) Superfamily	-0.0814156	0.48984
GD:00135	HEDGEHOG signaling pathway	-0.0778981	0.25614
GD:00126	ligand	-0.0748127	0.04294
GD:00037	T-box	-0.0720551	0.29354
GD:00161	The Cation-Chloride Cotransporter (CCC) Family	-0.0715201	0.62034
GD:00136	Circadian Clock pathway	-0.0707752	0.10198
GD:00177	The Divalent Anion:Na+ Symporter (DASS) Family	-0.0680119	0.69608
GD:00046	THAP|zf-C2H2	-0.0612069	0.79513
GD:00068	DM	-0.0569388	0.65143
GD:00146	The ATP-binding Cassette (ABC) Superfamily	-0.0561314	0.23803
GD:00086	bZIP_Maf	-0.0517156	0.87671
GD:00006	mitochondrial	-0.051007	0.00016
GD:00034	HMG_box	-0.0498751	0.28805
GD:00149	Secondary Transporter	-0.0459979	0.03425
GD:00033	ARID	-0.0449734	0.75542
GD:00162	The Solute:Sodium Symporter (SSS) Family	-0.0439425	0.76822
GD:00152	The P-type ATPase (P-ATPase) Superfamily	-0.043301	0.48988
GD:00158	The Voltage-gated Ion Channel (VIC) Superfamily	-0.0421117	0.441
GD:00111	GPCR	-0.0413432	0.13719
GD:00001	glycoprotein	-0.0367804	0.02079
GD:00150	The Mitochondrial Carrier (MC) Family	-0.0366952	0.57021
GD:00127	WNT signaling pathway	-0.0354935	0.31277
GD:00008	Maybe TF	-0.0351374	0.22146
GD:00003	peroxisomal	-0.0350581	0.24817
GD:00090	CBFA_NFYB_domain	-0.032497	0.93656
GD:00122	INSULIN signaling pathway	-0.0298545	0.50769
GD:00005	cytoskeletal	-0.0296765	0.02647
GD:00170	The Amino Acid-Polyamine-Organocation (APC) Family	-0.0280304	0.74485
GD:00145	ATP-Dependent	-0.0269513	0.39826
GD:00144	transporter	-0.0259967	0.09477
GD:00016	Chromatin regulation	-0.0257399	0.57261
GD:00116	metabolism	-0.0226871	0.03377
GD:00002	transmembrane	-0.0221246	0.00282
GD:00140	JAK/STAT signaling pathway	-0.0198644	0.8388
GD:00204	The Cation Diffusion Facilitator (CDF) Family	-0.0184964	0.89192
GD:00125	TNF alpha signaling pathway	-0.0172278	0.7237
GD:00206	chaperon_heatshock	-0.0166972	0.66077
GD:00045	BESS	-0.0148375	0.88628
GD:00117	enzyme	-0.0146451	0.21521
GD:00186	The Anion Exchanger (AE) Family	-0.0145967	0.93955
GD:00160	The Major Facilitator Superfamily (MFS)	-0.0130961	0.7157
GD:00038	Fork_head	-0.0123239	0.83042
GD:00118	other	-0.0119116	0.46022
GD:00143	conservedBilaterian	-0.00799787	0.53043
GD:00198	The Resistance-Nodulation-Cell Division (RND) Superfamily	-0.007413	0.95905
GD:00048	zf-BED	-0.0070874	0.96904
GD:00123	EGFR and PVR RTK signaling pathway	-0.00702692	0.84275
GD:00012	zf-C2H2	-0.00669803	0.71674
GD:00110	nuclear_encoded_oxidative_phos	-0.0043523	0.94183
GD:00044	AT_hook|zf-C2H2	-0.00410721	0.98395
GD:00113	Non-protein Phosphatase	-0.00374468	0.9301
GD:00119	secreted	-0.00360793	0.80507
GD:00077	CP2	-0.00124412	0.99141
GD:00004	autophagy	0.0038534	0.86295
GD:00147	Ion Channels	0.00638162	0.82935
noCat	unclassified or without annotation	0.00669196	0.34183
GD:00205	splicesome	0.00753566	0.8688
GD:00015	Homeobox	0.00819153	0.68349
GD:00128	NOTCH signaling pathway	0.0117295	0.78988
GD:00115	ubiquitin_related	0.0118289	0.46849
GD:00133	Toll pathway	0.0130232	0.8308
GD:00105	rna_binding	0.0130895	0.3528
GD:00129	receptor	0.0134172	0.72267
GD:00011	DNA-binding with transcription factor activity	0.0152259	0.09625
GD:00112	phosphatase	0.0165637	0.52662
GD:00055	CBF	0.0171825	0.96643
GD:00121	FGFR signaling pathway	0.0174696	0.6002
GD:00108	Non-protein Kinase	0.0213081	0.53656
GD:00120	major_signalling_pathway	0.0250508	0.05717
GD:00114	Protein Phosphatase	0.0300044	0.3626
GD:00109	receptors	0.0330419	0.01148
GD:00159	The Ca2+:Cation Antiporter (CaCA) Family	0.0357527	0.82336
GD:00085	MH1	0.03767	0.86296
GD:00073	Homeobox|PAX	0.041314	0.63527
GD:00164	The Arsenite-Antimonite (ArsB) Efflux Family	0.0453169	0.89187
GD:00065	Ski_Sno	0.0467152	0.71089
GD:00153	The H+- or Na+-translocating F-type, V-type and A-type ATPase (F-ATPase) Superfamily	0.051054	0.46313
GD:00069	E2F_TDP	0.0602565	0.57428
GD:00032	HTH_psq	0.0607907	0.34997
GD:00132	Planar Cell Polarity pathway	0.063728	0.08916
GD:00199	The Organo Anion Transporter (OAT) Family	0.0637851	0.63937
GD:00023	MADF	0.0661111	0.53074
GD:00098	zf-MIZ	0.0709091	0.6344
GD:00131	Imd pathway	0.0717282	0.20812
GD:00137	NCore	0.0724395	0.27151
GD:00020	Homeobox|Pou	0.0775692	0.30667
GD:00106	kinase	0.078166	0
GD:00107	Protein Kinase	0.0916394	0
GD:00041	SRF-TF	0.0992337	0.45388
GD:00018	HLH	0.0993336	0.00622
GD:00075	GATA	0.109635	0.20305
GD:00139	HIPPO signaling pathway	0.109924	0.06823
GD:00184	The Peroxisomal Protein Importer (PPI) Family	0.119535	0.51272
GD:00183	Unclassified	0.119535	0.51272
GD:00025	Co-factor	0.120046	0.0047
GD:00197	The Monovalent Cation:Proton Antiporter-1 (CPA1) Family	0.123632	0.52067
GD:00163	The Glutamate-gated Ion Channel (GIC) Family of Neurotransmitter Receptors	0.131847	0.14394
GD:00051	THAP	0.135266	0.81477
GD:00104	proteasome	0.142811	0.07199
GD:00165	The Neurotransmitter Receptor, Cys loop, Ligand-gated Ion Channel (LIC) Family	0.148683	0.0302
GD:00154	The Neurotransmitter:Sodium Symporter (NSS) Family	0.149794	0.10996
GD:00007	TF_dnabind	0.173146	0.0597
GD:00064	CUT|Homeobox	0.180516	0.58815
GD:00141	Nuclear hormone receptor	0.181354	1e-05
GD:00151	The Annexin (Annexin) Family	0.193168	0.31559
GD:00070	zf-C4	0.194533	0
GD:00169	The Mitochondrial Protein Translocase (MPT) Family	0.229545	0.11186
GD:00189	The Copper Transporter (Ctr) Family	0.281997	0.62525
GD:00101	Homeobox|zf-C2H2	0.284934	0.04843
GD:00178	The Transient Receptor Potential Ca2+ Channel (TRP-CC) Family	0.295113	0.07668
GD:00028	AT_hook	0.300241	0.00211
GD:00067	RHD|TIG	0.322462	0.03057
GD:00060	PAX	0.339823	0.00579
GD:00056	RPEL	0.376369	0.06525
GD:00182	The Ryanodine-Inositol 1,4,5-triphosphate Receptor Ca2+ Channel (RIR-CaC) Family	0.516551	0.02843
GD:00148	The Ammonia Transporter Channel (Amt) Family	0.568889	0.32447
GD:00074	zeste	0.5743	0.31989

## Sheet: Allelic_Imbalance
acc	name	passed	count	oddsratio	pvalue	time_ooint	acc_time	type
PC00218	transcription factor	397	8070	0.702	0	24h	PC00218_24h	ATAC_cat_distal
PC00171	nucleic acid binding	445	8474	0.758	0	24h	PC00171_24h	ATAC_cat_distal
PC00116	helix-turn-helix transcription factor	102	2437	0.612	0	24h	PC00116_24h	ATAC_cat_distal
PC00119	homeobox transcription factor	102	2437	0.612	0	24h	PC00119_24h	ATAC_cat_distal
PC00009	DNA binding protein	156	3124	0.739	0.000234	24h	PC00009_24h	ATAC_cat_distal
PC00073	chaperonin	7	25	5.578	0.000847	24h	PC00073_24h	ATAC_cat_distal
PC00147	mRNA processing factor	65	656	1.587	0.001031	24h	PC00147_24h	ATAC_cat_distal
PC00148	mRNA splicing factor	56	557	1.612	0.001349	24h	PC00148_24h	ATAC_cat_distal
PC00072	chaperone	22	167	2.181	0.001498	24h	PC00072_24h	ATAC_cat_distal
PC00146	mRNA polyadenylation factor	26	213	1.999	0.001982	24h	PC00146_24h	ATAC_cat_distal
PC00143	lipase	24	196	2.006	0.003211	24h	PC00143_24h	ATAC_cat_distal
PC00134	ionotropic glutamate receptor	7	33	3.861	0.004761	24h	PC00134_24h	ATAC_cat_distal
PC00068	cation transporter	40	390	1.645	0.005123	24h	PC00068_24h	ATAC_cat_distal
PC00052	apolipoprotein	10	61	2.813	0.005848	24h	PC00052_24h	ATAC_cat_distal
PC00134	ionotropic glutamate receptor	21	43	10.283	0	68h	PC00134_68h	ATAC_cat_distal
PC00218	transcription factor	721	10394	0.767	0	68h	PC00218_68h	ATAC_cat_distal
PC00171	nucleic acid binding	779	10874	0.797	0	68h	PC00171_68h	ATAC_cat_distal
PC00116	helix-turn-helix transcription factor	198	3305	0.671	0	68h	PC00116_68h	ATAC_cat_distal
PC00119	homeobox transcription factor	198	3305	0.671	0	68h	PC00119_68h	ATAC_cat_distal
PC00141	ligand-gated ion channel	37	221	2.167	8.3e-05	68h	PC00141_68h	ATAC_cat_distal
PC00072	chaperone	34	202	2.18	0.000122	68h	PC00072_68h	ATAC_cat_distal
PC00022	G-protein modulator	63	1138	0.624	0.000138	68h	PC00022_68h	ATAC_cat_distal
PC00140	kinase modulator	82	633	1.607	0.000183	68h	PC00140_68h	ATAC_cat_distal
PC00073	chaperonin	10	33	4.674	0.000296	68h	PC00073_68h	ATAC_cat_distal
PC00111	glycosyltransferase	55	396	1.739	0.000384	68h	PC00111_68h	ATAC_cat_distal
PC00172	nucleotide kinase	2	144	0.151	0.000479	68h	PC00172_68h	ATAC_cat_distal
PC00153	metalloprotease	47	345	1.699	0.001343	68h	PC00153_68h	ATAC_cat_distal
PC00139	kinase inhibitor	31	202	1.951	0.001394	68h	PC00139_68h	ATAC_cat_distal
PC00133	ion channel	87	730	1.46	0.00166	68h	PC00133_68h	ATAC_cat_distal
PC00055	basic helix-loop-helix transcription factor	18	408	0.494	0.001747	68h	PC00055_68h	ATAC_cat_distal
PC00240	voltage-gated calcium channel	13	64	2.74	0.002585	68h	PC00240_68h	ATAC_cat_distal
PC00058	calcium channel	13	64	2.74	0.002585	68h	PC00058_68h	ATAC_cat_distal
PC00057	cadherin	13	314	0.462	0.003184	68h	PC00057_68h	ATAC_cat_distal
PC00103	extracellular matrix structural protein	20	420	0.535	0.003722	68h	PC00103_68h	ATAC_cat_distal
PC00212	surfactant	3	134	0.245	0.004828	68h	PC00212_68h	ATAC_cat_distal
PC00038	acetyltransferase	50	402	1.53	0.006985	68h	PC00038_68h	ATAC_cat_distal
PC00208	small GTPase	2	109	0.2	0.008672	68h	PC00208_68h	ATAC_cat_distal
PC00218	transcription factor	663	11265	0.81	1e-06	1012h	PC00218_1012h	ATAC_cat_distal
PC00116	helix-turn-helix transcription factor	163	3241	0.697	4e-06	1012h	PC00116_1012h	ATAC_cat_distal
PC00119	homeobox transcription factor	163	3241	0.697	4e-06	1012h	PC00119_1012h	ATAC_cat_distal
PC00103	extracellular matrix structural protein	16	533	0.411	0.000107	1012h	PC00103_1012h	ATAC_cat_distal
PC00073	chaperonin	10	39	4.612	0.00026	1012h	PC00073_1012h	ATAC_cat_distal
PC00220	transferase	376	4514	1.231	0.000289	1012h	PC00220_1012h	ATAC_cat_distal
PC00080	cyclic nucleotide-gated ion channel	12	55	3.733	0.000336	1012h	PC00080_1012h	ATAC_cat_distal
PC00241	voltage-gated ion channel	33	246	2.076	0.000351	1012h	PC00241_1012h	ATAC_cat_distal
PC00188	potassium channel	24	164	2.295	0.000548	1012h	PC00188_1012h	ATAC_cat_distal
PC00242	voltage-gated potassium channel	24	164	2.295	0.000548	1012h	PC00242_1012h	ATAC_cat_distal
PC00193	protein kinase	188	2136	1.3	0.001031	1012h	PC00193_1012h	ATAC_cat_distal
PC00038	acetyltransferase	50	448	1.684	0.001046	1012h	PC00038_1012h	ATAC_cat_distal
PC00102	extracellular matrix protein	173	3119	0.777	0.001202	1012h	PC00102_1012h	ATAC_cat_distal
PC00148	mRNA splicing factor	96	1005	1.418	0.001783	1012h	PC00148_1012h	ATAC_cat_distal
PC00151	membrane trafficking regulatory protein	36	310	1.76	0.002441	1012h	PC00151_1012h	ATAC_cat_distal
PC00147	mRNA processing factor	112	1219	1.359	0.003113	1012h	PC00147_1012h	ATAC_cat_distal
PC00133	ion channel	95	1015	1.386	0.003489	1012h	PC00133_1012h	ATAC_cat_distal
PC00146	mRNA polyadenylation factor	45	418	1.617	0.003706	1012h	PC00146_1012h	ATAC_cat_distal
PC00171	nucleic acid binding	759	11938	0.89	0.00408	1012h	PC00171_1012h	ATAC_cat_distal
PC00167	non-receptor serine/threonine protein kinase	112	1241	1.332	0.005756	1012h	PC00167_1012h	ATAC_cat_distal
PC00137	kinase	208	2486	1.229	0.006375	1012h	PC00137_1012h	ATAC_cat_distal
PC00032	RNA helicase	13	85	2.415	0.008009	1012h	PC00032_1012h	ATAC_cat_distal
PC00169	nuclear hormone receptor	23	546	0.585	0.008758	1012h	PC00169_1012h	ATAC_cat_distal
NA	NA	NA	NA	NA	NA	NA	NA	NA
GO:0031012	extracellular matrix	173	3119	0.777	0.001202	1012h	GO:0031012_1012h	ATAC_cat_distal
GO:0005576	extracellular region	173	3119	0.777	0.001202	1012h	GO:0005576_1012h	ATAC_cat_distal
NA	NA	NA	NA	NA	NA	NA	NA	NA
GO:0005634	nucleus	541	10460	0.733	0	24h	GO:0005634_24h	ATAC_cat_distal
GO:0016222	procollagen-proline 4-dioxygenase complex	13	32	9.833	0	24h	GO:0016222_24h	ATAC_cat_distal
GO:0005693	U12 snRNP	7	9	50.222	0	24h	GO:0005693_24h	ATAC_cat_distal
GO:0008230	ecdysone receptor holocomplex	26	175	2.511	8.1e-05	24h	GO:0008230_24h	ATAC_cat_distal
GO:0000242	pericentriolar material	6	13	12.294	8.9e-05	24h	GO:0000242_24h	ATAC_cat_distal
GO:0030288	outer membrane-bounded periplasmic space	4	7	19.113	0.000541	24h	GO:0030288_24h	ATAC_cat_distal
GO:0005667	transcription factor complex	27	750	0.53	0.000575	24h	GO:0005667_24h	ATAC_cat_distal
GO:0005956	protein kinase CK2 complex	7	25	5.578	0.000847	24h	GO:0005956_24h	ATAC_cat_distal
GO:0005576	extracellular region	130	1496	1.379	0.00095	24h	GO:0005576_24h	ATAC_cat_distal
GO:0030904	retromer complex	3	5	21.495	0.002515	24h	GO:0030904_24h	ATAC_cat_distal
GO:0016021	integral to membrane	275	3563	1.217	0.003386	24h	GO:0016021_24h	ATAC_cat_distal
GO:0030532	small nuclear ribonucleoprotein complex	9	48	3.311	0.003502	24h	GO:0030532_24h	ATAC_cat_distal
GO:0032580	Golgi cisterna membrane	5	17	5.973	0.003768	24h	GO:0032580_24h	ATAC_cat_distal
GO:0044456	synapse part	2	2	Inf	0.004261	24h	GO:0044456_24h	ATAC_cat_distal
GO:0005703	polytene chromosome puff	3	176	0.248	0.005301	24h	GO:0005703_24h	ATAC_cat_distal
GO:0035363	histone locus body	6	26	4.302	0.005705	24h	GO:0035363_24h	ATAC_cat_distal
GO:0005955	calcineurin complex	4	12	7.166	0.005869	24h	GO:0005955_24h	ATAC_cat_distal
GO:0008305	integrin complex	15	110	2.267	0.005876	24h	GO:0008305_24h	ATAC_cat_distal
GO:0008021	synaptic vesicle	17	130	2.16	0.006347	24h	GO:0008021_24h	ATAC_cat_distal
GO:0030134	ER to Golgi transport vesicle	6	27	4.097	0.006936	24h	GO:0030134_24h	ATAC_cat_distal
GO:0005962	mitochondrial isocitrate dehydrogenase complex (NAD+)	9	54	2.869	0.007819	24h	GO:0005962_24h	ATAC_cat_distal
GO:0005919	pleated septate junction	7	36	3.461	0.007842	24h	GO:0005919_24h	ATAC_cat_distal
GO:0005634	nucleus	946	13465	0.768	0	68h	GO:0005634_68h	ATAC_cat_distal
GO:0071683	sensory dendrite	10	11	107.537	0	68h	GO:0071683_68h	ATAC_cat_distal
GO:0016222	procollagen-proline 4-dioxygenase complex	17	45	6.535	0	68h	GO:0016222_68h	ATAC_cat_distal
GO:0010369	chromocenter	10	16	17.921	0	68h	GO:0010369_68h	ATAC_cat_distal
GO:0044611	nuclear pore inner ring	6	6	Inf	0	68h	GO:0044611_68h	ATAC_cat_distal
GO:0030288	outer membrane-bounded periplasmic space	8	13	17.198	2e-06	68h	GO:0030288_68h	ATAC_cat_distal
GO:0070725	Yb body	6	7	64.472	2e-06	68h	GO:0070725_68h	ATAC_cat_distal
GO:0031933	telomeric heterochromatin	6	7	64.472	2e-06	68h	GO:0031933_68h	ATAC_cat_distal
GO:0005667	transcription factor complex	44	957	0.513	3e-06	68h	GO:0005667_68h	ATAC_cat_distal
GO:0005886	plasma membrane	344	5018	0.775	6e-06	68h	GO:0005886_68h	ATAC_cat_distal
GO:0005693	U12 snRNP	8	15	12.284	1e-05	68h	GO:0005693_68h	ATAC_cat_distal
GO:0000242	pericentriolar material	8	16	10.748	1.9e-05	68h	GO:0000242_68h	ATAC_cat_distal
GO:0045202	synapse	8	310	0.283	2.4e-05	68h	GO:0045202_68h	ATAC_cat_distal
GO:0030139	endocytic vesicle	12	378	0.35	4.1e-05	68h	GO:0030139_68h	ATAC_cat_distal
GO:0008230	ecdysone receptor holocomplex	35	214	2.106	0.000187	68h	GO:0008230_68h	ATAC_cat_distal
GO:0031227	intrinsic to endoplasmic reticulum membrane	4	5	42.964	0.000246	68h	GO:0031227_68h	ATAC_cat_distal
GO:0032580	Golgi cisterna membrane	8	22	6.141	0.000297	68h	GO:0032580_68h	ATAC_cat_distal
GO:0031594	neuromuscular junction	49	900	0.614	0.000582	68h	GO:0031594_68h	ATAC_cat_distal
GO:0044456	synapse part	3	3	Inf	0.000619	68h	GO:0044456_68h	ATAC_cat_distal
GO:0005769	early endosome	10	292	0.379	0.000717	68h	GO:0005769_68h	ATAC_cat_distal
GO:0005654	nucleoplasm	41	281	1.84	0.000792	68h	GO:0005654_68h	ATAC_cat_distal
GO:0005956	protein kinase CK2 complex	8	26	4.776	0.001065	68h	GO:0005956_68h	ATAC_cat_distal
GO:0031514	motile cilium	12	52	3.225	0.001182	68h	GO:0031514_68h	ATAC_cat_distal
GO:0005891	voltage-gated calcium channel complex	13	60	2.974	0.0014	68h	GO:0005891_68h	ATAC_cat_distal
GO:0005868	cytoplasmic dynein complex	10	40	3.583	0.001563	68h	GO:0005868_68h	ATAC_cat_distal
GO:0045171	intercellular bridge	8	28	4.298	0.001816	68h	GO:0045171_68h	ATAC_cat_distal
GO:0016935	glycine-gated chloride channel complex	9	36	3.582	0.002652	68h	GO:0016935_68h	ATAC_cat_distal
GO:0005938	cell cortex	43	760	0.641	0.003221	68h	GO:0005938_68h	ATAC_cat_distal
GO:0030133	transport vesicle	6	20	4.604	0.005193	68h	GO:0030133_68h	ATAC_cat_distal
GO:0005703	polytene chromosome puff	7	206	0.377	0.005548	68h	GO:0005703_68h	ATAC_cat_distal
GO:0051233	spindle midzone	5	15	5.371	0.006508	68h	GO:0051233_68h	ATAC_cat_distal
noCat	unclassified	1943	21755	1.085	0.007159	68h	noCat_68h	ATAC_cat_distal
GO:0030118	clathrin coat	2	2	Inf	0.007263	68h	GO:0030118_68h	ATAC_cat_distal
GO:0000813	ESCRT I complex	2	2	Inf	0.007263	68h	GO:0000813_68h	ATAC_cat_distal
GO:0005905	coated pit	2	2	Inf	0.007263	68h	GO:0005905_68h	ATAC_cat_distal
GO:0030496	midbody	16	93	2.234	0.007598	68h	GO:0030496_68h	ATAC_cat_distal
GO:0016222	procollagen-proline 4-dioxygenase complex	23	57	9.07	0	1012h	GO:0016222_1012h	ATAC_cat_distal
GO:0005693	U12 snRNP	12	22	16.061	0	1012h	GO:0005693_1012h	ATAC_cat_distal
GO:0010369	chromocenter	9	17	15.048	1e-06	1012h	GO:0010369_1012h	ATAC_cat_distal
GO:0005634	nucleus	887	14589	0.836	2e-06	1012h	GO:0005634_1012h	ATAC_cat_distal
GO:0000242	pericentriolar material	10	27	7.869	7e-06	1012h	GO:0000242_1012h	ATAC_cat_distal
GO:0005667	transcription factor complex	36	975	0.508	1.5e-05	1012h	GO:0005667_1012h	ATAC_cat_distal
GO:0044611	nuclear pore inner ring	5	7	33.417	3.1e-05	1012h	GO:0044611_1012h	ATAC_cat_distal
GO:0005654	nucleoplasm	39	284	2.135	5.4e-05	1012h	GO:0005654_1012h	ATAC_cat_distal
GO:0045202	synapse	9	390	0.314	5.7e-05	1012h	GO:0045202_1012h	ATAC_cat_distal
GO:0031931	TORC1 complex	8	22	7.641	7.3e-05	1012h	GO:0031931_1012h	ATAC_cat_distal
GO:0005868	cytoplasmic dynein complex	11	41	4.905	8.3e-05	1012h	GO:0005868_1012h	ATAC_cat_distal
GO:0031227	intrinsic to endoplasmic reticulum membrane	4	5	53.458	0.000111	1012h	GO:0031227_1012h	ATAC_cat_distal
GO:0008352	katanin complex	6	13	11.459	0.000127	1012h	GO:0008352_1012h	ATAC_cat_distal
GO:0042765	GPI-anchor transamidase complex	4	6	26.728	0.000315	1012h	GO:0042765_1012h	ATAC_cat_distal
GO:0016363	nuclear matrix	21	134	2.488	0.00046	1012h	GO:0016363_1012h	ATAC_cat_distal
GO:0005783	endoplasmic reticulum	67	626	1.609	0.000496	1012h	GO:0005783_1012h	ATAC_cat_distal
GO:0001726	ruffle	1	147	0.091	0.000514	1012h	GO:0001726_1012h	ATAC_cat_distal
GO:0005657	replication fork	4	7	17.819	0.000694	1012h	GO:0005657_1012h	ATAC_cat_distal
GO:0031594	neuromuscular junction	47	1045	0.625	0.001139	1012h	GO:0031594_1012h	ATAC_cat_distal
GO:0031933	telomeric heterochromatin	4	8	13.364	0.001311	1012h	GO:0031933_1012h	ATAC_cat_distal
GO:0070725	Yb body	4	8	13.364	0.001311	1012h	GO:0070725_1012h	ATAC_cat_distal
GO:0005876	spindle microtubule	0	93	0	0.001872	1012h	GO:0005876_1012h	ATAC_cat_distal
GO:0030426	growth cone	2	146	0.185	0.003112	1012h	GO:0030426_1012h	ATAC_cat_distal
GO:0008305	integrin complex	24	188	1.959	0.003765	1012h	GO:0008305_1012h	ATAC_cat_distal
GO:0005764	lysosome	7	30	4.069	0.003878	1012h	GO:0005764_1012h	ATAC_cat_distal
GO:0000235	astral microtubule	2	141	0.192	0.004418	1012h	GO:0000235_1012h	ATAC_cat_distal
GO:0005891	voltage-gated calcium channel complex	11	65	2.724	0.005006	1012h	GO:0005891_1012h	ATAC_cat_distal
GO:0043186	P granule	7	32	3.743	0.005675	1012h	GO:0043186_1012h	ATAC_cat_distal
GO:0044666	MLL3/4 complex	5	18	5.14	0.006511	1012h	GO:0044666_1012h	ATAC_cat_distal
GO:0005811	lipid particle	33	736	0.624	0.0069	1012h	GO:0005811_1012h	ATAC_cat_distal
GO:0005664	nuclear origin of replication recognition complex	4	12	6.682	0.007395	1012h	GO:0005664_1012h	ATAC_cat_distal
GO:0005813	centrosome	15	406	0.511	0.007922	1012h	GO:0005813_1012h	ATAC_cat_distal
GO:0045178	basal part of cell	23	190	1.843	0.009446	1012h	GO:0045178_1012h	ATAC_cat_distal
NA	NA	NA	NA	NA	NA	NA	NA	NA
FBdv:00004450	stage11-12	328	6687	0.707	0	24h	FBdv:00004450_24h	ATAC_cat_distal
noCat	unclassified	2433	35327	1.294	0	24h	noCat_24h	ATAC_cat_distal
FBdv:00005331	stage13-16	406	7794	0.754	0	24h	FBdv:00005331_24h	ATAC_cat_distal
FBdv:00014201	stage9-10	267	5082	0.774	7.1e-05	24h	FBdv:00014201_24h	ATAC_cat_distal
noCat	unclassified	4099	45888	1.263	0	68h	noCat_68h	ATAC_cat_distal
FBdv:00004450	stage11-12	599	8458	0.794	0	68h	FBdv:00004450_68h	ATAC_cat_distal
FBdv:00005331	stage13-16	729	10020	0.816	1e-06	68h	FBdv:00005331_68h	ATAC_cat_distal
FBdv:00014201	stage9-10	460	6129	0.858	0.002353	68h	FBdv:00014201_68h	ATAC_cat_distal
FBdv:00005304	stage4-6	222	3132	0.811	0.002769	68h	FBdv:00005304_68h	ATAC_cat_distal
FBdv:00005319	stage7-8	259	3598	0.824	0.003102	68h	FBdv:00005319_68h	ATAC_cat_distal
FBdv:00004450	stage11-12	471	8743	0.736	0	1012h	FBdv:00004450_1012h	ATAC_cat_distal
FBdv:00014201	stage9-10	291	5782	0.69	0	1012h	FBdv:00014201_1012h	ATAC_cat_distal
FBdv:00005331	stage13-16	654	11212	0.801	0	1012h	FBdv:00005331_1012h	ATAC_cat_distal
noCat	unclassified	4090	56644	1.207	0	1012h	noCat_1012h	ATAC_cat_distal
FBdv:00005304	stage4-6	133	2760	0.667	3e-06	1012h	FBdv:00005304_1012h	ATAC_cat_distal
FBdv:00005319	stage7-8	170	3222	0.735	7.2e-05	1012h	FBdv:00005319_1012h	ATAC_cat_distal
NA	NA	NA	NA	NA	NA	NA	NA	NA
ctID:00068	suhw	393	4385	1.47	0	24h	ctID:00068_24h	ATAC_cat_distal
ctID:00026	ttk	312	3418	1.488	0	24h	ctID:00026_24h	ATAC_cat_distal
ctID:00065	trx	240	2625	1.478	0	24h	ctID:00065_24h	ATAC_cat_distal
ctID:00052	hr39	74	626	1.942	1e-06	24h	ctID:00052_24h	ATAC_cat_distal
ctID:00022	cp190	369	4479	1.325	2e-06	24h	ctID:00022_24h	ATAC_cat_distal
ctID:00029	sens	865	14911	0.835	1.2e-05	24h	ctID:00029_24h	ATAC_cat_distal
ctID:00003	doc2	454	5775	1.26	1.9e-05	24h	ctID:00003_24h	ATAC_cat_distal
ctID:00015	modmdg4	350	4337	1.29	2.7e-05	24h	ctID:00015_24h	ATAC_cat_distal
ctID:00053	zld	1090	15084	1.179	3.1e-05	24h	ctID:00053_24h	ATAC_cat_distal
ctID:00069	tll	210	2446	1.37	4.4e-05	24h	ctID:00069_24h	ATAC_cat_distal
ctID:00055	dtcf	527	6941	1.213	0.000133	24h	ctID:00055_24h	ATAC_cat_distal
ctID:00070	phol	92	953	1.546	0.000195	24h	ctID:00070_24h	ATAC_cat_distal
ctID:00048	dfd	89	928	1.534	0.000352	24h	ctID:00048_24h	ATAC_cat_distal
ctID:00056	trl	673	9212	1.165	0.000898	24h	ctID:00056_24h	ATAC_cat_distal
ctID:00005	gatae	58	575	1.618	0.001162	24h	ctID:00005_24h	ATAC_cat_distal
ctID:00050	beaf32	204	2522	1.279	0.001612	24h	ctID:00050_24h	ATAC_cat_distal
ctID:00041	ubx	20	579	0.509	0.001638	24h	ctID:00041_24h	ATAC_cat_distal
ctID:00004	inv	163	3114	0.779	0.002064	24h	ctID:00004_24h	ATAC_cat_distal
ctID:00036	dl	562	7688	1.158	0.002864	24h	ctID:00036_24h	ATAC_cat_distal
ctID:00006	hth	547	9321	0.869	0.003655	24h	ctID:00006_24h	ATAC_cat_distal
ctID:00032	ctcf	315	4140	1.2	0.003722	24h	ctID:00032_24h	ATAC_cat_distal
ctID:00039	sna	569	7850	1.146	0.005019	24h	ctID:00039_24h	ATAC_cat_distal
ctID:00026	ttk	447	3799	1.472	0	68h	ctID:00026_68h	ATAC_cat_distal
ctID:00068	suhw	579	5297	1.358	0	68h	ctID:00068_68h	ATAC_cat_distal
ctID:00029	sens	1317	17656	0.819	0	68h	ctID:00029_68h	ATAC_cat_distal
ctID:00022	cp190	574	5357	1.324	0	68h	ctID:00022_68h	ATAC_cat_distal
ctID:00015	modmdg4	546	5175	1.298	0	68h	ctID:00015_68h	ATAC_cat_distal
ctID:00065	trx	344	3072	1.379	0	68h	ctID:00065_68h	ATAC_cat_distal
ctID:00013	run	296	4405	0.759	5e-06	68h	ctID:00013_68h	ATAC_cat_distal
ctID:00052	hr39	102	768	1.657	9e-06	68h	ctID:00052_68h	ATAC_cat_distal
ctID:00002	gt	589	8045	0.828	2.6e-05	68h	ctID:00002_68h	ATAC_cat_distal
ctID:00056	trl	1050	11039	1.161	5e-05	68h	ctID:00056_68h	ATAC_cat_distal
ctID:00069	tll	274	2562	1.301	9.3e-05	68h	ctID:00069_68h	ATAC_cat_distal
ctID:00070	phol	126	1051	1.474	0.000114	68h	ctID:00070_68h	ATAC_cat_distal
ctID:00006	hth	863	11271	0.868	0.000227	68h	ctID:00006_68h	ATAC_cat_distal
ctID:00032	ctcf	491	4940	1.204	0.000267	68h	ctID:00032_68h	ATAC_cat_distal
ctID:00058	kni	148	2263	0.744	0.00041	68h	ctID:00058_68h	ATAC_cat_distal
ctID:00048	dfd	122	1047	1.426	0.000427	68h	ctID:00048_68h	ATAC_cat_distal
ctID:00055	dtcf	757	7950	1.152	0.000711	68h	ctID:00055_68h	ATAC_cat_distal
ctID:00059	bcd	255	3608	0.807	0.001107	68h	ctID:00059_68h	ATAC_cat_distal
ctID:00005	gatae	81	667	1.491	0.001295	68h	ctID:00005_68h	ATAC_cat_distal
ctID:00050	beaf32	298	2936	1.226	0.00161	68h	ctID:00050_68h	ATAC_cat_distal
ctID:00071	shn	129	1938	0.759	0.002205	68h	ctID:00071_68h	ATAC_cat_distal
ctID:00030	gsbn	140	1286	1.32	0.002868	68h	ctID:00030_68h	ATAC_cat_distal
ctID:00017	ftz	98	1514	0.738	0.003276	68h	ctID:00017_68h	ATAC_cat_distal
ctID:00003	doc2	598	6353	1.13	0.007794	68h	ctID:00003_68h	ATAC_cat_distal
ctID:00053	zld	880	15659	0.752	0	1012h	ctID:00053_1012h	ATAC_cat_distal
ctID:00029	sens	985	17138	0.769	0	1012h	ctID:00029_1012h	ATAC_cat_distal
ctID:00002	gt	392	7182	0.752	0	1012h	ctID:00002_1012h	ATAC_cat_distal
ctID:00045	dichaete	476	8506	0.77	0	1012h	ctID:00045_1012h	ATAC_cat_distal
ctID:00006	hth	644	11108	0.796	0	1012h	ctID:00006_1012h	ATAC_cat_distal
ctID:00028	slp1	865	14467	0.818	0	1012h	ctID:00028_1012h	ATAC_cat_distal
ctID:00056	trl	1023	12741	1.208	0	1012h	ctID:00056_1012h	ATAC_cat_distal
ctID:00018	kr	970	15903	0.836	1e-06	1012h	ctID:00018_1012h	ATAC_cat_distal
ctID:00039	sna	413	7343	0.778	1e-06	1012h	ctID:00039_1012h	ATAC_cat_distal
ctID:00059	bcd	158	3191	0.686	2e-06	1012h	ctID:00059_1012h	ATAC_cat_distal
ctID:00065	trx	314	3482	1.345	3e-06	1012h	ctID:00065_1012h	ATAC_cat_distal
ctID:00013	run	195	3782	0.715	4e-06	1012h	ctID:00013_1012h	ATAC_cat_distal
ctID:00010	en	642	7850	1.217	1.2e-05	1012h	ctID:00010_1012h	ATAC_cat_distal
ctID:00024	tin	498	8447	0.819	2.9e-05	1012h	ctID:00024_1012h	ATAC_cat_distal
ctID:00026	ttk	324	3719	1.293	3e-05	1012h	ctID:00026_1012h	ATAC_cat_distal
ctID:00068	suhw	563	6940	1.201	0.000109	1012h	ctID:00068_1012h	ATAC_cat_distal
ctID:00009	hb	634	10424	0.845	0.00011	1012h	ctID:00009_1012h	ATAC_cat_distal
ctID:00017	ftz	55	1261	0.605	0.000114	1012h	ctID:00017_1012h	ATAC_cat_distal
ctID:00071	shn	78	1657	0.654	0.000137	1012h	ctID:00071_1012h	ATAC_cat_distal
ctID:00072	cad	663	10826	0.852	0.000165	1012h	ctID:00072_1012h	ATAC_cat_distal
ctID:00035	med	821	13118	0.871	0.000394	1012h	ctID:00035_1012h	ATAC_cat_distal
ctID:00049	hkb	245	4325	0.792	0.000395	1012h	ctID:00049_1012h	ATAC_cat_distal
ctID:00014	hr4	778	9998	1.15	0.000658	1012h	ctID:00014_1012h	ATAC_cat_distal
ctID:00015	modmdg4	466	5796	1.185	0.001027	1012h	ctID:00015_1012h	ATAC_cat_distal
ctID:00020	twi	1051	16420	0.89	0.001117	1012h	ctID:00020_1012h	ATAC_cat_distal
ctID:00022	cp190	497	6232	1.174	0.001363	1012h	ctID:00022_1012h	ATAC_cat_distal
ctID:00030	gsbn	129	1412	1.352	0.00181	1012h	ctID:00030_1012h	ATAC_cat_distal
ctID:00016	pmad	238	4097	0.815	0.002411	1012h	ctID:00016_1012h	ATAC_cat_distal
ctID:00001	prd	479	7785	0.862	0.00256	1012h	ctID:00001_1012h	ATAC_cat_distal
ctID:00043	hr78	29	687	0.586	0.003226	1012h	ctID:00043_1012h	ATAC_cat_distal
ctID:00040	pnr	327	5440	0.844	0.003636	1012h	ctID:00040_1012h	ATAC_cat_distal
ctID:00021	dll	1	106	0.127	0.00696	1012h	ctID:00021_1012h	ATAC_cat_distal
NA	NA	NA	NA	NA	NA	NA	NA	NA
P04394	Thyrotropin-releasing hormone receptor signaling pathway	15	84	3.123	0.000326	24h	P04394_24h	ATAC_cat_distal
P00019	Endothelin signaling pathway	24	184	2.157	0.001339	24h	P00019_24h	ATAC_cat_distal
P00011	Blood coagulation	3	7	10.747	0.007971	24h	P00011_24h	ATAC_cat_distal
P05914	Nicotine degradation	16	66	3.442	0.000104	68h	P05914_68h	ATAC_cat_distal
P00057	Wnt signaling pathway	128	1979	0.736	0.000669	68h	P00057_68h	ATAC_cat_distal
P04394	Thyrotropin-releasing hormone receptor signaling pathway	16	87	2.423	0.003039	68h	P04394_68h	ATAC_cat_distal
P00053	T cell activation	10	44	3.161	0.003345	68h	P00053_68h	ATAC_cat_distal
P00060	Ubiquitin proteasome pathway	3	134	0.245	0.004828	68h	P00060_68h	ATAC_cat_distal
P02725	Allantoin degradation	3	5	16.108	0.005424	68h	P02725_68h	ATAC_cat_distal
P00006	Apoptosis signaling pathway	13	80	2.595	0.00345	1012h	P00006_1012h	ATAC_cat_distal
P00053	T cell activation	12	73	2.631	0.00441	1012h	P00053_1012h	ATAC_cat_distal
P00029	Huntington disease	33	287	1.74	0.004907	1012h	P00029_1012h	ATAC_cat_distal
P02776	Serine glycine biosynthesis	3	7	10.021	0.009556	1012h	P02776_1012h	ATAC_cat_distal
NA	NA	NA	NA	NA	NA	NA	NA	NA
GO:0003700	sequence-specific DNA binding transcription factor activity	303	6344	0.687	0	24h	GO:0003700_24h	ATAC_cat_distal
GO:0005516	calmodulin binding	22	81	5.37	0	24h	GO:0005516_24h	ATAC_cat_distal
GO:0004656	procollagen-proline 4-dioxygenase activity	13	32	9.833	0	24h	GO:0004656_24h	ATAC_cat_distal
GO:0016702	oxidoreductase activity, acting on single donors with incorporation of molecular oxygen, incorporation of two atoms of oxygen	13	32	9.833	0	24h	GO:0016702_24h	ATAC_cat_distal
GO:0031418	L-ascorbic acid binding	13	33	9.341	0	24h	GO:0031418_24h	ATAC_cat_distal
GO:0005436	sodium:phosphate symporter activity	12	29	10.142	0	24h	GO:0005436_24h	ATAC_cat_distal
GO:0003705	RNA polymerase II distal enhancer sequence-specific DNA binding transcription factor activity	58	1583	0.536	1e-06	24h	GO:0003705_24h	ATAC_cat_distal
GO:0004842	ubiquitin-protein ligase activity	39	256	2.593	1e-06	24h	GO:0004842_24h	ATAC_cat_distal
GO:0030556	rRNA modification guide activity	8	16	14.352	3e-06	24h	GO:0030556_24h	ATAC_cat_distal
GO:0033417	CUU codon-amino acid adaptor activity	7	12	20.087	3e-06	24h	GO:0033417_24h	ATAC_cat_distal
GO:0004114	3',5'-cyclic-nucleotide phosphodiesterase activity	8	20	9.567	2e-05	24h	GO:0004114_24h	ATAC_cat_distal
GO:0004687	myosin light chain kinase activity	7	15	12.554	2e-05	24h	GO:0004687_24h	ATAC_cat_distal
GO:0051082	unfolded protein binding	17	87	3.491	4.2e-05	24h	GO:0051082_24h	ATAC_cat_distal
GO:0005215	transporter activity	29	205	2.372	8.8e-05	24h	GO:0005215_24h	ATAC_cat_distal
GO:0000977	RNA polymerase II regulatory region sequence-specific DNA binding	14	523	0.391	0.000112	24h	GO:0000977_24h	ATAC_cat_distal
GO:0000166	nucleotide binding	103	1086	1.518	0.000145	24h	GO:0000166_24h	ATAC_cat_distal
GO:0003729	mRNA binding	85	862	1.582	0.000161	24h	GO:0003729_24h	ATAC_cat_distal
GO:0043565	sequence-specific DNA binding	189	3680	0.76	0.000259	24h	GO:0043565_24h	ATAC_cat_distal
GO:0035258	steroid hormone receptor binding	17	103	2.84	0.000358	24h	GO:0035258_24h	ATAC_cat_distal
GO:0030374	ligand-dependent nuclear receptor transcription coactivator activity	17	103	2.84	0.000358	24h	GO:0030374_24h	ATAC_cat_distal
GO:0008745	N-acetylmuramoyl-L-alanine amidase activity	5	11	11.949	0.000391	24h	GO:0008745_24h	ATAC_cat_distal
GO:0042834	peptidoglycan binding	5	11	11.949	0.000391	24h	GO:0042834_24h	ATAC_cat_distal
GO:0033446	AGC codon-amino acid adaptor activity	7	23	6.276	0.000485	24h	GO:0033446_24h	ATAC_cat_distal
GO:0016922	ligand-dependent nuclear receptor binding	8	30	5.217	0.000522	24h	GO:0016922_24h	ATAC_cat_distal
GO:0004115	3',5'-cyclic-AMP phosphodiesterase activity	8	31	4.99	0.000663	24h	GO:0004115_24h	ATAC_cat_distal
GO:0005507	copper ion binding	1	155	0.093	0.000821	24h	GO:0005507_24h	ATAC_cat_distal
GO:0019887	protein kinase regulator activity	7	25	5.578	0.000847	24h	GO:0019887_24h	ATAC_cat_distal
GO:0005544	calcium-dependent phospholipid binding	11	56	3.509	0.000871	24h	GO:0005544_24h	ATAC_cat_distal
GO:0016229	steroid dehydrogenase activity	3	4	42.991	0.001058	24h	GO:0016229_24h	ATAC_cat_distal
GO:0004707	MAP kinase activity	17	111	2.598	0.001416	24h	GO:0004707_24h	ATAC_cat_distal
GO:0000980	RNA polymerase II distal enhancer sequence-specific DNA binding	17	514	0.487	0.001613	24h	GO:0000980_24h	ATAC_cat_distal
GO:0005543	phospholipid binding	34	842	0.598	0.00238	24h	GO:0005543_24h	ATAC_cat_distal
GO:0001653	peptide receptor activity	3	5	21.495	0.002515	24h	GO:0001653_24h	ATAC_cat_distal
GO:0017124	SH3 domain binding	12	74	2.778	0.002922	24h	GO:0017124_24h	ATAC_cat_distal
GO:0033421	CCU codon-amino acid adaptor activity	6	23	5.061	0.00296	24h	GO:0033421_24h	ATAC_cat_distal
GO:0008134	transcription factor binding	53	1169	0.674	0.003961	24h	GO:0008134_24h	ATAC_cat_distal
GO:0003723	RNA binding	41	398	1.653	0.004077	24h	GO:0003723_24h	ATAC_cat_distal
GO:0003714	transcription corepressor activity	21	169	2.039	0.004367	24h	GO:0003714_24h	ATAC_cat_distal
GO:0008187	poly-pyrimidine tract binding	12	78	2.609	0.00455	24h	GO:0008187_24h	ATAC_cat_distal
GO:0004500	dopamine beta-monooxygenase activity	1	122	0.118	0.004973	24h	GO:0004500_24h	ATAC_cat_distal
GO:0015276	ligand-gated ion channel activity	7	34	3.718	0.005663	24h	GO:0015276_24h	ATAC_cat_distal
GO:0001078	RNA polymerase II core promoter proximal region sequence-specific DNA binding transcription factor activity involved in negative regulation of transcription	13	401	0.477	0.005783	24h	GO:0001078_24h	ATAC_cat_distal
GO:0072320	volume-sensitive chloride channel activity	4	12	7.166	0.005869	24h	GO:0072320_24h	ATAC_cat_distal
GO:0004723	calcium-dependent protein serine/threonine phosphatase activity	4	12	7.166	0.005869	24h	GO:0004723_24h	ATAC_cat_distal
GO:0004867	serine-type endopeptidase inhibitor activity	2	145	0.2	0.006363	24h	GO:0004867_24h	ATAC_cat_distal
GO:0050661	NADP binding	6	27	4.097	0.006936	24h	GO:0050661_24h	ATAC_cat_distal
GO:0004791	thioredoxin-disulfide reductase activity	3	7	10.747	0.007971	24h	GO:0004791_24h	ATAC_cat_distal
GO:0004362	glutathione-disulfide reductase activity	3	7	10.747	0.007971	24h	GO:0004362_24h	ATAC_cat_distal
GO:0008010	structural constituent of chitin-based larval cuticle	3	7	10.747	0.007971	24h	GO:0008010_24h	ATAC_cat_distal
GO:0003674	molecular_function	249	3250	1.205	0.007997	24h	GO:0003674_24h	ATAC_cat_distal
GO:0004091	carboxylesterase activity	14	104	2.233	0.008611	24h	GO:0004091_24h	ATAC_cat_distal
GO:0004716	receptor signaling protein tyrosine kinase activity	0	78	0	0.009689	24h	GO:0004716_24h	ATAC_cat_distal
GO:0015020	glucuronosyltransferase activity	9	56	2.747	0.009914	24h	GO:0015020_24h	ATAC_cat_distal
GO:0005506	iron ion binding	25	227	1.778	0.009939	24h	GO:0005506_24h	ATAC_cat_distal
GO:0005516	calmodulin binding	36	104	5.715	0	68h	GO:0005516_68h	ATAC_cat_distal
GO:0003700	sequence-specific DNA binding transcription factor activity	540	8341	0.713	0	68h	GO:0003700_68h	ATAC_cat_distal
GO:0015276	ligand-gated ion channel activity	21	47	8.7	0	68h	GO:0015276_68h	ATAC_cat_distal
GO:0005234	extracellular-glutamate-gated ion channel activity	14	26	12.553	0	68h	GO:0005234_68h	ATAC_cat_distal
GO:0051082	unfolded protein binding	29	105	4.113	0	68h	GO:0051082_68h	ATAC_cat_distal
GO:0008745	N-acetylmuramoyl-L-alanine amidase activity	12	21	14.342	0	68h	GO:0008745_68h	ATAC_cat_distal
GO:0042834	peptidoglycan binding	12	21	14.342	0	68h	GO:0042834_68h	ATAC_cat_distal
GO:0004970	ionotropic glutamate receptor activity	12	21	14.342	0	68h	GO:0004970_68h	ATAC_cat_distal
GO:0004842	ubiquitin-protein ligase activity	58	314	2.448	0	68h	GO:0004842_68h	ATAC_cat_distal
GO:0008432	JUN kinase binding	8	9	85.996	0	68h	GO:0008432_68h	ATAC_cat_distal
GO:0004791	thioredoxin-disulfide reductase activity	7	7	Inf	0	68h	GO:0004791_68h	ATAC_cat_distal
GO:0004362	glutathione-disulfide reductase activity	7	7	Inf	0	68h	GO:0004362_68h	ATAC_cat_distal
GO:0004656	procollagen-proline 4-dioxygenase activity	17	45	6.535	0	68h	GO:0004656_68h	ATAC_cat_distal
GO:0016702	oxidoreductase activity, acting on single donors with incorporation of molecular oxygen, incorporation of two atoms of oxygen	17	45	6.535	0	68h	GO:0016702_68h	ATAC_cat_distal
GO:0031418	L-ascorbic acid binding	17	47	6.099	0	68h	GO:0031418_68h	ATAC_cat_distal
GO:0003705	RNA polymerase II distal enhancer sequence-specific DNA binding transcription factor activity	111	2027	0.613	0	68h	GO:0003705_68h	ATAC_cat_distal
GO:0004114	3',5'-cyclic-nucleotide phosphodiesterase activity	10	19	11.947	1e-06	68h	GO:0004114_68h	ATAC_cat_distal
GO:0015020	glucuronosyltransferase activity	21	77	4.037	1e-06	68h	GO:0015020_68h	ATAC_cat_distal
GO:0051536	iron-sulfur cluster binding	9	16	13.822	2e-06	68h	GO:0051536_68h	ATAC_cat_distal
GO:0045503	dynein light chain binding	5	5	Inf	4e-06	68h	GO:0045503_68h	ATAC_cat_distal
GO:0033446	AGC codon-amino acid adaptor activity	10	22	8.96	5e-06	68h	GO:0033446_68h	ATAC_cat_distal
GO:0017147	Wnt-protein binding	14	447	0.345	6e-06	68h	GO:0017147_68h	ATAC_cat_distal
GO:0005515	protein binding	457	6442	0.802	1e-05	68h	GO:0005515_68h	ATAC_cat_distal
GO:0001653	peptide receptor activity	8	16	10.748	1.9e-05	68h	GO:0001653_68h	ATAC_cat_distal
GO:0004500	dopamine beta-monooxygenase activity	2	182	0.119	2.6e-05	68h	GO:0004500_68h	ATAC_cat_distal
GO:0035258	steroid hormone receptor binding	26	127	2.772	3.5e-05	68h	GO:0035258_68h	ATAC_cat_distal
GO:0030374	ligand-dependent nuclear receptor transcription coactivator activity	26	127	2.772	3.5e-05	68h	GO:0030374_68h	ATAC_cat_distal
GO:0004888	transmembrane signaling receptor activity	49	972	0.566	3.7e-05	68h	GO:0004888_68h	ATAC_cat_distal
GO:0008188	neuropeptide receptor activity	16	61	3.825	3.7e-05	68h	GO:0008188_68h	ATAC_cat_distal
GO:0043565	sequence-specific DNA binding	331	4755	0.789	4.3e-05	68h	GO:0043565_68h	ATAC_cat_distal
GO:0003723	RNA binding	76	557	1.706	4.8e-05	68h	GO:0003723_68h	ATAC_cat_distal
GO:0005507	copper ion binding	4	220	0.198	5e-05	68h	GO:0005507_68h	ATAC_cat_distal
GO:0030246	carbohydrate binding	9	321	0.308	5e-05	68h	GO:0030246_68h	ATAC_cat_distal
GO:0016209	antioxidant activity	13	44	4.51	5.1e-05	68h	GO:0016209_68h	ATAC_cat_distal
GO:0033405	UCU codon-amino acid adaptor activity	10	29	5.658	8.8e-05	68h	GO:0033405_68h	ATAC_cat_distal
GO:0019894	kinesin binding	10	29	5.658	8.8e-05	68h	GO:0019894_68h	ATAC_cat_distal
GO:0000977	RNA polymerase II regulatory region sequence-specific DNA binding	31	673	0.515	9.6e-05	68h	GO:0000977_68h	ATAC_cat_distal
GO:0000981	sequence-specific DNA binding RNA polymerase II transcription factor activity	31	674	0.515	9.6e-05	68h	GO:0000981_68h	ATAC_cat_distal
GO:0008379	thioredoxin peroxidase activity	16	67	3.375	0.000126	68h	GO:0008379_68h	ATAC_cat_distal
GO:0017124	SH3 domain binding	19	88	2.963	0.000132	68h	GO:0017124_68h	ATAC_cat_distal
GO:0004995	tachykinin receptor activity	5	8	17.905	0.000202	68h	GO:0004995_68h	ATAC_cat_distal
GO:0033408	UCG codon-amino acid adaptor activity	8	21	6.614	0.000204	68h	GO:0033408_68h	ATAC_cat_distal
GO:0016758	transferase activity, transferring hexosyl groups	10	32	4.886	0.000223	68h	GO:0016758_68h	ATAC_cat_distal
GO:0033417	CUU codon-amino acid adaptor activity	6	12	10.744	0.000225	68h	GO:0033417_68h	ATAC_cat_distal
GO:0042071	leucokinin receptor activity	4	5	42.964	0.000246	68h	GO:0042071_68h	ATAC_cat_distal
GO:0019187	beta-1,4-mannosyltransferase activity	4	5	42.964	0.000246	68h	GO:0019187_68h	ATAC_cat_distal
GO:0030551	cyclic nucleotide binding	4	5	42.964	0.000246	68h	GO:0030551_68h	ATAC_cat_distal
GO:0004518	nuclease activity	4	5	42.964	0.000246	68h	GO:0004518_68h	ATAC_cat_distal
GO:0000980	RNA polymerase II distal enhancer sequence-specific DNA binding	28	610	0.514	0.000248	68h	GO:0000980_68h	ATAC_cat_distal
GO:0003714	transcription corepressor activity	33	200	2.128	0.000298	68h	GO:0003714_68h	ATAC_cat_distal
GO:0004716	receptor signaling protein tyrosine kinase activity	0	96	0	0.000341	68h	GO:0004716_68h	ATAC_cat_distal
GO:0017056	structural constituent of nuclear pore	6	13	9.209	0.000387	68h	GO:0017056_68h	ATAC_cat_distal
GO:0003674	molecular_function	424	4246	1.208	0.000504	68h	GO:0003674_68h	ATAC_cat_distal
GO:0004703	G-protein coupled receptor kinase activity	10	36	4.134	0.000642	68h	GO:0004703_68h	ATAC_cat_distal
GO:0016929	SUMO-specific protease activity	4	6	21.482	0.000687	68h	GO:0016929_68h	ATAC_cat_distal
GO:0008528	G-protein coupled peptide receptor activity	7	20	5.786	0.00093	68h	GO:0008528_68h	ATAC_cat_distal
GO:0008805	carbon-monoxide oxygenase activity	6	15	7.162	0.000972	68h	GO:0008805_68h	ATAC_cat_distal
GO:0019887	protein kinase regulator activity	8	26	4.776	0.001065	68h	GO:0019887_68h	ATAC_cat_distal
GO:0004115	3',5'-cyclic-AMP phosphodiesterase activity	10	39	3.706	0.001268	68h	GO:0004115_68h	ATAC_cat_distal
GO:0033431	CGA codon-amino acid adaptor activity	9	33	4.03	0.001372	68h	GO:0033431_68h	ATAC_cat_distal
GO:0016922	ligand-dependent nuclear receptor binding	9	33	4.03	0.001372	68h	GO:0016922_68h	ATAC_cat_distal
GO:0005245	voltage-gated calcium channel activity	11	48	3.196	0.001986	68h	GO:0005245_68h	ATAC_cat_distal
GO:0015269	calcium-activated potassium channel activity	6	17	5.86	0.002071	68h	GO:0015269_68h	ATAC_cat_distal
GO:0008134	transcription factor binding	90	1425	0.719	0.002087	68h	GO:0008134_68h	ATAC_cat_distal
GO:0001078	RNA polymerase II core promoter proximal region sequence-specific DNA binding transcription factor activity involved in negative regulation of transcription	26	527	0.555	0.002146	68h	GO:0001078_68h	ATAC_cat_distal
GO:0004707	MAP kinase activity	20	116	2.241	0.002248	68h	GO:0004707_68h	ATAC_cat_distal
GO:0003993	acid phosphatase activity	7	23	4.701	0.002343	68h	GO:0003993_68h	ATAC_cat_distal
GO:0016934	extracellular-glycine-gated chloride channel activity	9	36	3.582	0.002652	68h	GO:0016934_68h	ATAC_cat_distal
GO:0008559	xenobiotic-transporting ATPase activity	9	36	3.582	0.002652	68h	GO:0008559_68h	ATAC_cat_distal
GO:0017168	5-oxoprolinase (ATP-hydrolyzing) activity	4	8	10.74	0.002786	68h	GO:0017168_68h	ATAC_cat_distal
GO:0008060	ARF GTPase activator activity	2	120	0.182	0.002879	68h	GO:0008060_68h	ATAC_cat_distal
GO:0030556	rRNA modification guide activity	6	18	5.372	0.002884	68h	GO:0030556_68h	ATAC_cat_distal
GO:0016207	4-coumarate-CoA ligase activity	6	18	5.372	0.002884	68h	GO:0016207_68h	ATAC_cat_distal
GO:0033421	CCU codon-amino acid adaptor activity	7	24	4.424	0.003067	68h	GO:0033421_68h	ATAC_cat_distal
GO:0004222	metalloendopeptidase activity	43	319	1.678	0.003301	68h	GO:0004222_68h	ATAC_cat_distal
GO:0005104	fibroblast growth factor receptor binding	3	141	0.233	0.003546	68h	GO:0005104_68h	ATAC_cat_distal
GO:0017111	nucleoside-triphosphatase activity	5	176	0.313	0.004087	68h	GO:0017111_68h	ATAC_cat_distal
GO:0008046	axon guidance receptor activity	5	178	0.31	0.004219	68h	GO:0008046_68h	ATAC_cat_distal
GO:0004984	olfactory receptor activity	15	82	2.407	0.004355	68h	GO:0004984_68h	ATAC_cat_distal
GO:0004674	protein serine/threonine kinase activity	137	1269	1.307	0.00439	68h	GO:0004674_68h	ATAC_cat_distal
GO:0003779	actin binding	75	1193	0.716	0.004614	68h	GO:0003779_68h	ATAC_cat_distal
GO:0003777	microtubule motor activity	23	150	1.948	0.005136	68h	GO:0003777_68h	ATAC_cat_distal
GO:0005099	Ras GTPase activator activity	9	241	0.415	0.005198	68h	GO:0005099_68h	ATAC_cat_distal
GO:0016015	morphogen activity	4	151	0.291	0.005259	68h	GO:0016015_68h	ATAC_cat_distal
GO:0050897	cobalt ion binding	3	5	16.108	0.005424	68h	GO:0050897_68h	ATAC_cat_distal
GO:0004038	allantoinase activity	3	5	16.108	0.005424	68h	GO:0004038_68h	ATAC_cat_distal
GO:0030247	polysaccharide binding	8	33	3.438	0.005532	68h	GO:0030247_68h	ATAC_cat_distal
GO:0042813	Wnt-activated receptor activity	11	273	0.449	0.006191	68h	GO:0042813_68h	ATAC_cat_distal
GO:0005549	odorant binding	19	115	2.128	0.006333	68h	GO:0005549_68h	ATAC_cat_distal
GO:0008301	DNA binding, bending	25	484	0.583	0.006764	68h	GO:0008301_68h	ATAC_cat_distal
GO:0043499	eukaryotic cell surface binding	1	91	0.119	0.007	68h	GO:0043499_68h	ATAC_cat_distal
GO:0001077	RNA polymerase II core promoter proximal region sequence-specific DNA binding transcription factor activity involved in positive regulation of transcription	75	1173	0.729	0.007047	68h	GO:0001077_68h	ATAC_cat_distal
GO:0005545	1-phosphatidylinositol binding	2	2	Inf	0.007263	68h	GO:0005545_68h	ATAC_cat_distal
GO:0030276	clathrin binding	2	2	Inf	0.007263	68h	GO:0030276_68h	ATAC_cat_distal
GO:0005546	phosphatidylinositol-4,5-bisphosphate binding	10	49	2.755	0.007503	68h	GO:0005546_68h	ATAC_cat_distal
GO:0033462	GGC codon-amino acid adaptor activity	10	49	2.755	0.007503	68h	GO:0033462_68h	ATAC_cat_distal
GO:0050661	NADP binding	7	28	3.581	0.007764	68h	GO:0050661_68h	ATAC_cat_distal
GO:0016274	protein-arginine N-methyltransferase activity	0	61	0	0.009237	68h	GO:0016274_68h	ATAC_cat_distal
GO:0004879	ligand-activated sequence-specific DNA binding RNA polymerase II transcription factor activity	33	589	0.635	0.009271	68h	GO:0004879_68h	ATAC_cat_distal
GO:0016503	pheromone receptor activity	7	29	3.418	0.009496	68h	GO:0016503_68h	ATAC_cat_distal
GO:0031490	chromatin DNA binding	1	83	0.131	0.009502	68h	GO:0031490_68h	ATAC_cat_distal
GO:0000978	RNA polymerase II core promoter proximal region sequence-specific DNA binding	4	143	0.308	0.009998	68h	GO:0000978_68h	ATAC_cat_distal
GO:0004656	procollagen-proline 4-dioxygenase activity	23	62	7.907	0	1012h	GO:0004656_1012h	ATAC_cat_distal
GO:0016702	oxidoreductase activity, acting on single donors with incorporation of molecular oxygen, incorporation of two atoms of oxygen	23	62	7.907	0	1012h	GO:0016702_1012h	ATAC_cat_distal
GO:0031418	L-ascorbic acid binding	23	64	7.521	0	1012h	GO:0031418_1012h	ATAC_cat_distal
GO:0004362	glutathione-disulfide reductase activity	7	7	Inf	0	1012h	GO:0004362_1012h	ATAC_cat_distal
GO:0004791	thioredoxin-disulfide reductase activity	7	7	Inf	0	1012h	GO:0004791_1012h	ATAC_cat_distal
GO:0003700	sequence-specific DNA binding transcription factor activity	499	8897	0.771	0	1012h	GO:0003700_1012h	ATAC_cat_distal
GO:0003705	RNA polymerase II distal enhancer sequence-specific DNA binding transcription factor activity	84	1930	0.601	1e-06	1012h	GO:0003705_1012h	ATAC_cat_distal
GO:0018738	S-formylglutathione hydrolase activity	5	5	Inf	2e-06	1012h	GO:0018738_1012h	ATAC_cat_distal
GO:0043565	sequence-specific DNA binding	271	5055	0.743	2e-06	1012h	GO:0043565_1012h	ATAC_cat_distal
GO:0033446	AGC codon-amino acid adaptor activity	11	32	7.008	6e-06	1012h	GO:0033446_1012h	ATAC_cat_distal
GO:0051082	unfolded protein binding	22	112	3.274	9e-06	1012h	GO:0051082_1012h	ATAC_cat_distal
GO:0005516	calmodulin binding	26	147	2.879	1e-05	1012h	GO:0005516_1012h	ATAC_cat_distal
GO:0004674	protein serine/threonine kinase activity	153	1543	1.485	1.3e-05	1012h	GO:0004674_1012h	ATAC_cat_distal
GO:0080023	3R-hydroxyacyl-CoA dehydratase activity	6	10	20.054	1.9e-05	1012h	GO:0080023_1012h	ATAC_cat_distal
GO:0045503	dynein light chain binding	4	4	Inf	2.4e-05	1012h	GO:0045503_1012h	ATAC_cat_distal
GO:0016316	phosphatidylinositol-3,4-bisphosphate 4-phosphatase activity	4	4	Inf	2.4e-05	1012h	GO:0016316_1012h	ATAC_cat_distal
GO:0003714	transcription corepressor activity	33	218	2.391	2.5e-05	1012h	GO:0003714_1012h	ATAC_cat_distal
GO:0000149	SNARE binding	7	15	11.7	3.1e-05	1012h	GO:0000149_1012h	ATAC_cat_distal
GO:0051536	iron-sulfur cluster binding	7	15	11.7	3.1e-05	1012h	GO:0051536_1012h	ATAC_cat_distal
GO:0004879	ligand-activated sequence-specific DNA binding RNA polymerase II transcription factor activity	27	770	0.483	4.6e-05	1012h	GO:0004879_1012h	ATAC_cat_distal
GO:0033408	UCG codon-amino acid adaptor activity	8	21	8.229	4.9e-05	1012h	GO:0033408_1012h	ATAC_cat_distal
GO:0005244	voltage-gated ion channel activity	6	12	13.369	7.3e-05	1012h	GO:0005244_1012h	ATAC_cat_distal
GO:0030246	carbohydrate binding	11	422	0.356	0.00011	1012h	GO:0030246_1012h	ATAC_cat_distal
GO:0008967	phosphoglycolate phosphatase activity	4	5	53.458	0.000111	1012h	GO:0008967_1012h	ATAC_cat_distal
GO:0004518	nuclease activity	4	5	53.458	0.000111	1012h	GO:0004518_1012h	ATAC_cat_distal
GO:0004842	ubiquitin-protein ligase activity	40	310	1.986	0.000184	1012h	GO:0004842_1012h	ATAC_cat_distal
GO:0003993	acid phosphatase activity	9	31	5.471	0.000189	1012h	GO:0003993_1012h	ATAC_cat_distal
GO:0016209	antioxidant activity	11	45	4.328	0.000205	1012h	GO:0016209_1012h	ATAC_cat_distal
GO:0016788	hydrolase activity, acting on ester bonds	6	14	10.026	0.00021	1012h	GO:0016788_1012h	ATAC_cat_distal
GO:0004300	enoyl-CoA hydratase activity	6	14	10.026	0.00021	1012h	GO:0004300_1012h	ATAC_cat_distal
GO:0017056	structural constituent of nuclear pore	5	10	13.366	0.000307	1012h	GO:0017056_1012h	ATAC_cat_distal
GO:0004500	dopamine beta-monooxygenase activity	3	212	0.191	0.000353	1012h	GO:0004500_1012h	ATAC_cat_distal
GO:0005083	small GTPase regulator activity	25	171	2.293	0.000414	1012h	GO:0005083_1012h	ATAC_cat_distal
GO:0008311	double-stranded DNA specific 3'-5' exodeoxyribonuclease activity	6	16	8.021	0.000496	1012h	GO:0008311_1012h	ATAC_cat_distal
GO:0000175	3'-5'-exoribonuclease activity	6	16	8.021	0.000496	1012h	GO:0000175_1012h	ATAC_cat_distal
GO:0005509	calcium ion binding	105	2052	0.714	0.000592	1012h	GO:0005509_1012h	ATAC_cat_distal
GO:0004672	protein kinase activity	104	1077	1.436	0.000879	1012h	GO:0004672_1012h	ATAC_cat_distal
GO:0003707	steroid hormone receptor activity	17	497	0.471	0.000998	1012h	GO:0003707_1012h	ATAC_cat_distal
GO:0008310	single-stranded DNA specific 3'-5' exodeoxyribonuclease activity	6	18	6.684	0.001018	1012h	GO:0008310_1012h	ATAC_cat_distal
GO:0033431	CGA codon-amino acid adaptor activity	8	31	4.651	0.001018	1012h	GO:0033431_1012h	ATAC_cat_distal
GO:0050661	NADP binding	10	46	3.715	0.001065	1012h	GO:0050661_1012h	ATAC_cat_distal
GO:0004702	receptor signaling protein serine/threonine kinase activity	24	169	2.216	0.001167	1012h	GO:0004702_1012h	ATAC_cat_distal
GO:0005249	voltage-gated potassium channel activity	15	89	2.712	0.001202	1012h	GO:0005249_1012h	ATAC_cat_distal
GO:0015467	G-protein activated inward rectifier potassium channel activity	3	4	40.085	0.001281	1012h	GO:0015467_1012h	ATAC_cat_distal
GO:0005242	inward rectifier potassium channel activity	3	4	40.085	0.001281	1012h	GO:0005242_1012h	ATAC_cat_distal
GO:0004313	[acyl-carrier-protein] S-acetyltransferase activity	6	19	6.17	0.0014	1012h	GO:0004313_1012h	ATAC_cat_distal
GO:0004314	[acyl-carrier-protein] S-malonyltransferase activity	6	19	6.17	0.0014	1012h	GO:0004314_1012h	ATAC_cat_distal
GO:0004315	3-oxoacyl-[acyl-carrier-protein] synthase activity	6	19	6.17	0.0014	1012h	GO:0004315_1012h	ATAC_cat_distal
GO:0004843	ubiquitin-specific protease activity	12	64	3.087	0.001406	1012h	GO:0004843_1012h	ATAC_cat_distal
GO:0008083	growth factor activity	13	406	0.44	0.001627	1012h	GO:0008083_1012h	ATAC_cat_distal
GO:0033462	GGC codon-amino acid adaptor activity	11	57	3.198	0.00172	1012h	GO:0033462_1012h	ATAC_cat_distal
GO:0003777	microtubule motor activity	24	179	2.073	0.001831	1012h	GO:0003777_1012h	ATAC_cat_distal
GO:0031005	filamin binding	3	183	0.222	0.001936	1012h	GO:0031005_1012h	ATAC_cat_distal
GO:0005221	intracellular cyclic nucleotide activated cation channel activity	7	27	4.679	0.002033	1012h	GO:0005221_1012h	ATAC_cat_distal
GO:0008270	zinc ion binding	423	6934	0.855	0.002681	1012h	GO:0008270_1012h	ATAC_cat_distal
GO:0003724	RNA helicase activity	5	15	6.683	0.00272	1012h	GO:0003724_1012h	ATAC_cat_distal
GO:0017124	SH3 domain binding	16	104	2.433	0.002795	1012h	GO:0017124_1012h	ATAC_cat_distal
GO:0035258	steroid hormone receptor binding	20	144	2.158	0.002805	1012h	GO:0035258_1012h	ATAC_cat_distal
GO:0030374	ligand-dependent nuclear receptor transcription coactivator activity	20	144	2.158	0.002805	1012h	GO:0030374_1012h	ATAC_cat_distal
GO:0008745	N-acetylmuramoyl-L-alanine amidase activity	7	29	4.254	0.003161	1012h	GO:0008745_1012h	ATAC_cat_distal
GO:0042834	peptidoglycan binding	7	29	4.254	0.003161	1012h	GO:0042834_1012h	ATAC_cat_distal
GO:0033405	UCU codon-amino acid adaptor activity	9	45	3.343	0.003426	1012h	GO:0033405_1012h	ATAC_cat_distal
GO:0017075	syntaxin-1 binding	4	10	8.909	0.003511	1012h	GO:0017075_1012h	ATAC_cat_distal
GO:0003824	catalytic activity	5	214	0.319	0.004366	1012h	GO:0003824_1012h	ATAC_cat_distal
GO:0008060	ARF GTPase activator activity	2	140	0.193	0.004414	1012h	GO:0008060_1012h	ATAC_cat_distal
GO:0008026	ATP-dependent helicase activity	6	24	4.455	0.005141	1012h	GO:0008026_1012h	ATAC_cat_distal
GO:0008511	sodium:potassium:chloride symporter activity	6	24	4.455	0.005141	1012h	GO:0008511_1012h	ATAC_cat_distal
GO:0004995	tachykinin receptor activity	4	11	7.636	0.005215	1012h	GO:0004995_1012h	ATAC_cat_distal
GO:0005353	fructose transmembrane transporter activity	3	6	13.361	0.005758	1012h	GO:0005353_1012h	ATAC_cat_distal
GO:0033421	CCU codon-amino acid adaptor activity	6	25	4.221	0.006372	1012h	GO:0033421_1012h	ATAC_cat_distal
GO:0019894	kinesin binding	7	33	3.599	0.006777	1012h	GO:0019894_1012h	ATAC_cat_distal
GO:0016787	hydrolase activity	3	158	0.258	0.007208	1012h	GO:0016787_1012h	ATAC_cat_distal
GO:0003725	double-stranded RNA binding	14	96	2.284	0.007631	1012h	GO:0003725_1012h	ATAC_cat_distal
GO:0033428	CAG codon-amino acid adaptor activity	7	34	3.466	0.008031	1012h	GO:0033428_1012h	ATAC_cat_distal
GO:0005245	voltage-gated calcium channel activity	9	52	2.798	0.009182	1012h	GO:0005245_1012h	ATAC_cat_distal
GO:0016262	protein N-acetylglucosaminyltransferase activity	6	27	3.819	0.009452	1012h	GO:0016262_1012h	ATAC_cat_distal
GO:0004372	glycine hydroxymethyltransferase activity	3	7	10.021	0.009556	1012h	GO:0004372_1012h	ATAC_cat_distal
GO:0003774	motor activity	21	170	1.886	0.009718	1012h	GO:0003774_1012h	ATAC_cat_distal
NA	NA	NA	NA	NA	NA	NA	NA	NA
FBbt:00005427	ectoderm anlage	267	6079	0.625	0	24h	FBbt:00005427_24h	ATAC_cat_distal
FBbt:00005558	ventral ectoderm	421	8659	0.689	0	24h	FBbt:00005558_24h	ATAC_cat_distal
FBbt:00005518	somatic muscle primordium	120	3193	0.541	0	24h	FBbt:00005518_24h	ATAC_cat_distal
FBbt:00005428	dorsal ectoderm anlage	244	5320	0.661	0	24h	FBbt:00005428_24h	ATAC_cat_distal
FBbt:00015256	central brain anlage	276	5735	0.696	0	24h	FBbt:00015256_24h	ATAC_cat_distal
FBbt:00015253	antennal anlage	269	5558	0.702	0	24h	FBbt:00015253_24h	ATAC_cat_distal
FBbt:00001673	embryonic/larval dorsal vessel	110	2700	0.593	0	24h	FBbt:00001673_24h	ATAC_cat_distal
FBbt:0000610	early embryonic segmentation	83	2171	0.557	0	24h	FBbt:0000610_24h	ATAC_cat_distal
FBbt:00005541	cardiogenic mesoderm	56	1633	0.499	0	24h	FBbt:00005541_24h	ATAC_cat_distal
FBbt:00015255	ventral head epidermis primordium	288	5851	0.714	0	24h	FBbt:00015255_24h	ATAC_cat_distal
FBbt:00014203	lateral head epidermis primordium	287	5818	0.716	0	24h	FBbt:00014203_24h	ATAC_cat_distal
FBbt:00005434	visual anlage	275	5603	0.713	0	24h	FBbt:00005434_24h	ATAC_cat_distal
FBbt:00004204	ventral ectoderm anlage	218	4593	0.691	0	24h	FBbt:00004204_24h	ATAC_cat_distal
FBbt:00000128	trunk mesoderm	353	6892	0.743	0	24h	FBbt:00000128_24h	ATAC_cat_distal
FBbt:00015247	dorsal head epidermis primordium	297	5878	0.736	0	24h	FBbt:00015247_24h	ATAC_cat_distal
FBbt:00005510	antennal primordium	288	5721	0.734	1e-06	24h	FBbt:00005510_24h	ATAC_cat_distal
FBbt:00001059	visual primordium	274	5466	0.731	1e-06	24h	FBbt:00001059_24h	ATAC_cat_distal
FBbt:00015248	dorsal head epidermis anlage	281	5552	0.739	1e-06	24h	FBbt:00015248_24h	ATAC_cat_distal
FBbt:00005533	ventral epidermis primordium	323	6248	0.754	2e-06	24h	FBbt:00005533_24h	ATAC_cat_distal
FBbt:00001369	neuroblast of ventral nerve cord primordium	97	2272	0.627	3e-06	24h	FBbt:00001369_24h	ATAC_cat_distal
FBbt:00005415	central brain anlage in statu nascendi	200	4108	0.714	4e-06	24h	FBbt:00005415_24h	ATAC_cat_distal
FBbt:00015252	antennal anlage in statu nascendi	202	4136	0.716	4e-06	24h	FBbt:00015252_24h	ATAC_cat_distal
FBbt:00005519	visceral muscle primordium	151	3235	0.685	4e-06	24h	FBbt:00005519_24h	ATAC_cat_distal
FBbt:00005425	visual anlage in statu nascendi	203	4143	0.719	5e-06	24h	FBbt:00005425_24h	ATAC_cat_distal
FBbt:00005554	ventral nerve cord primordium	457	8403	0.792	6e-06	24h	FBbt:00005554_24h	ATAC_cat_distal
FBbt:00001332	embryonic neuroblast	85	2014	0.62	7e-06	24h	FBbt:00001332_24h	ATAC_cat_distal
FBbt:00015249	dorsal head epidermis anlage in statu nascendi	207	4183	0.727	8e-06	24h	FBbt:00015249_24h	ATAC_cat_distal
FBbt:00005744	embryonic dorsal epidermis	376	7012	0.785	1.3e-05	24h	FBbt:00005744_24h	ATAC_cat_distal
FBbt:00004993	epidermis	95	2170	0.644	1.5e-05	24h	FBbt:00004993_24h	ATAC_cat_distal
FBbt:00005466	pericardial cell primordium	4	315	0.183	1.6e-05	24h	FBbt:00005466_24h	ATAC_cat_distal
FBbt:00000104	mesoderm anlage	189	3834	0.725	1.7e-05	24h	FBbt:00000104_24h	ATAC_cat_distal
FBbt:00001665	dorsal vessel primordium	24	766	0.459	3.3e-05	24h	FBbt:00001665_24h	ATAC_cat_distal
FBbt:00005747	embryonic ventral epidermis	323	6046	0.785	4.6e-05	24h	FBbt:00005747_24h	ATAC_cat_distal
FBbt:00000112	dorsal ectoderm	297	5611	0.779	4.8e-05	24h	FBbt:00000112_24h	ATAC_cat_distal
FBbt:00001069	embryonic stomatogastric nervous system	44	1152	0.562	6.4e-05	24h	FBbt:00001069_24h	ATAC_cat_distal
FBbt:00000441	hindgut proper primordium	253	4854	0.768	6.5e-05	24h	FBbt:00000441_24h	ATAC_cat_distal
FBbt:00005542	central brain primordium	475	8506	0.818	7.6e-05	24h	FBbt:00005542_24h	ATAC_cat_distal
FBbt:00001056	presumptive embryonic/larval central nervous system	218	4237	0.759	9e-05	24h	FBbt:00001056_24h	ATAC_cat_distal
FBbt:00001667	embryonic/larval pericardial cell	26	776	0.492	0.000127	24h	FBbt:00001667_24h	ATAC_cat_distal
FBbt:00005552	ventral sensory complex primordium	65	1517	0.633	0.000171	24h	FBbt:00005552_24h	ATAC_cat_distal
FBbt:00005665	embryonic central brain neuron	126	2616	0.713	0.000175	24h	FBbt:00005665_24h	ATAC_cat_distal
FBbt:00005442	hypopharynx anlage	15	531	0.413	0.000184	24h	FBbt:00005442_24h	ATAC_cat_distal
FBbt:00005673	lateral cord glial cell	92	2003	0.68	0.000211	24h	FBbt:00005673_24h	ATAC_cat_distal
FBbt:00005678	embryonic pericardial cell	13	470	0.405	0.000331	24h	FBbt:00005678_24h	ATAC_cat_distal
noCat	unclassified	1262	17900	1.147	0.000337	24h	noCat_24h	ATAC_cat_distal
FBbt:00005630	embryonic hindgut	318	5815	0.808	0.000388	24h	FBbt:00005630_24h	ATAC_cat_distal
FBbt:00001664	embryonic/larval circulatory system	70	1572	0.659	0.000486	24h	FBbt:00001664_24h	ATAC_cat_distal
FBbt:00005806	antennal sense organ	10	46	3.987	0.000644	24h	FBbt:00005806_24h	ATAC_cat_distal
FBbt:00000210	anterior endoderm anlage	161	3150	0.758	0.000669	24h	FBbt:00000210_24h	ATAC_cat_distal
FBbt:00005523	inclusive hindgut primordium	153	3014	0.753	0.000681	24h	FBbt:00005523_24h	ATAC_cat_distal
FBbt:00000125	endoderm	32	836	0.565	0.00086	24h	FBbt:00000125_24h	ATAC_cat_distal
FBbt:00005619	embryonic labial sensory complex	54	520	1.671	0.000878	24h	FBbt:00005619_24h	ATAC_cat_distal
FBbt:00000458	midgut constriction 1	11	399	0.404	0.001036	24h	FBbt:00000458_24h	ATAC_cat_distal
FBbt:00005526	dorsal epidermis primordium	323	5811	0.824	0.001209	24h	FBbt:00005526_24h	ATAC_cat_distal
FBbt:00005745	embryonic dorsal apodeme	20	582	0.506	0.001286	24h	FBbt:00005745_24h	ATAC_cat_distal
FBbt:00005498	dorsal pharyngeal muscle primordium	27	726	0.549	0.001396	24h	FBbt:00005498_24h	ATAC_cat_distal
FBbt:00005185	sensillum basiconicum	5	14	7.965	0.001437	24h	FBbt:00005185_24h	ATAC_cat_distal
FBbt:00005535	foregut primordium	231	4273	0.803	0.001613	24h	FBbt:00005535_24h	ATAC_cat_distal
FBbt:00004980	dorsal hair	4	9	11.467	0.00175	24h	FBbt:00004980_24h	ATAC_cat_distal
FBbt:10005329	posterior midgut primordium	315	5648	0.828	0.001906	24h	FBbt:10005329_24h	ATAC_cat_distal
FBbt:00005634	embryonic Malpighian tubule	109	2195	0.739	0.001926	24h	FBbt:00005634_24h	ATAC_cat_distal
FBbt:00000136	mesectoderm	98	2001	0.729	0.001929	24h	FBbt:00000136_24h	ATAC_cat_distal
FBbt:00002831	abdominal lateral pentascolopidial chordotonal organ lch5	4	217	0.268	0.002206	24h	FBbt:00002831_24h	ATAC_cat_distal
FBbt:00000180	embryonic abdominal segment 8	6	266	0.329	0.002524	24h	FBbt:00000180_24h	ATAC_cat_distal
FBbt:00001882	embryonic/larval midgut	361	6362	0.843	0.002902	24h	FBbt:00001882_24h	ATAC_cat_distal
FBbt:00000096	ventral furrow	25	659	0.561	0.003162	24h	FBbt:00000096_24h	ATAC_cat_distal
FBbt:00000164	embryonic maxillary segment	25	659	0.561	0.003162	24h	FBbt:00000164_24h	ATAC_cat_distal
FBbt:00015254	ventral head epidermis	5	237	0.307	0.003318	24h	FBbt:00015254_24h	ATAC_cat_distal
FBbt:00000444	anterior midgut primordium	276	4960	0.828	0.003496	24h	FBbt:00000444_24h	ATAC_cat_distal
FBbt:00005435	endoderm anlage	19	532	0.527	0.003506	24h	FBbt:00005435_24h	ATAC_cat_distal
FBbt:00000464	embryonic/larval somatic muscle	137	2628	0.777	0.004404	24h	FBbt:00000464_24h	ATAC_cat_distal
FBbt:00000170	embryonic metathoracic segment	13	405	0.473	0.004458	24h	FBbt:00000170_24h	ATAC_cat_distal
FBbt:00001891	embryonic/larval hindgut	97	1942	0.745	0.004814	24h	FBbt:00001891_24h	ATAC_cat_distal
FBbt:00001333	procephalic neuroblast	85	1726	0.734	0.005362	24h	FBbt:00001333_24h	ATAC_cat_distal
FBbt:00001920	embryonic/larval brain	74	1528	0.722	0.006095	24h	FBbt:00001920_24h	ATAC_cat_distal
FBbt:00005749	embryonic ventral apodeme	22	574	0.567	0.006377	24h	FBbt:00005749_24h	ATAC_cat_distal
FBbt:00005617	labral sensory complex	63	687	1.455	0.006401	24h	FBbt:00005617_24h	ATAC_cat_distal
FBbt:00005536	stomatogastric nervous system primordium	59	1260	0.697	0.006475	24h	FBbt:00005536_24h	ATAC_cat_distal
FBbt:00005631	embryonic small intestine	19	517	0.543	0.006944	24h	FBbt:00005631_24h	ATAC_cat_distal
FBbt:00004202	hindgut anlage	123	2359	0.779	0.007023	24h	FBbt:00004202_24h	ATAC_cat_distal
FBbt:00005503	hypopharynx inclusive primordium	20	529	0.56	0.007742	24h	FBbt:00005503_24h	ATAC_cat_distal
FBbt:00005606	embryonic foregut	320	5598	0.853	0.008653	24h	FBbt:00005606_24h	ATAC_cat_distal
FBbt:00005670	embryonic esophageal ganglion	2	137	0.212	0.00894	24h	FBbt:00005670_24h	ATAC_cat_distal
FBbt:00002442	abdominal dorsal bipolar neuron dbp	2	138	0.21	0.00895	24h	FBbt:00002442_24h	ATAC_cat_distal
FBbt:00000169	embryonic mesothoracic segment	13	386	0.497	0.009299	24h	FBbt:00000169_24h	ATAC_cat_distal
FBbt:00005024	tracheal system	23	202	1.846	0.009347	24h	FBbt:00005024_24h	ATAC_cat_distal
FBbt:00005805	Bolwig organ	28	680	0.611	0.00959	24h	FBbt:00005805_24h	ATAC_cat_distal
FBbt:00005427	ectoderm anlage	436	7605	0.62	0	68h	FBbt:00005427_68h	ATAC_cat_distal
FBbt:00005558	ventral ectoderm	647	10413	0.669	0	68h	FBbt:00005558_68h	ATAC_cat_distal
FBbt:00005428	dorsal ectoderm anlage	356	6220	0.626	0	68h	FBbt:00005428_68h	ATAC_cat_distal
FBbt:00015253	antennal anlage	400	6703	0.654	0	68h	FBbt:00015253_68h	ATAC_cat_distal
FBbt:00015255	ventral head epidermis primordium	437	7179	0.667	0	68h	FBbt:00015255_68h	ATAC_cat_distal
FBbt:00014203	lateral head epidermis primordium	436	7135	0.671	0	68h	FBbt:00014203_68h	ATAC_cat_distal
FBbt:00005510	antennal primordium	433	7064	0.673	0	68h	FBbt:00005510_68h	ATAC_cat_distal
FBbt:00015256	central brain anlage	424	6923	0.673	0	68h	FBbt:00015256_68h	ATAC_cat_distal
FBbt:00015247	dorsal head epidermis primordium	447	7223	0.68	0	68h	FBbt:00015247_68h	ATAC_cat_distal
FBbt:00005434	visual anlage	414	6763	0.674	0	68h	FBbt:00005434_68h	ATAC_cat_distal
FBbt:00000104	mesoderm anlage	258	4611	0.617	0	68h	FBbt:00000104_68h	ATAC_cat_distal
FBbt:00005554	ventral nerve cord primordium	707	10575	0.732	0	68h	FBbt:00005554_68h	ATAC_cat_distal
FBbt:00001332	embryonic neuroblast	127	2658	0.527	0	68h	FBbt:00001332_68h	ATAC_cat_distal
FBbt:00005541	cardiogenic mesoderm	85	2001	0.467	0	68h	FBbt:00005541_68h	ATAC_cat_distal
FBbt:00001059	visual primordium	415	6715	0.681	0	68h	FBbt:00001059_68h	ATAC_cat_distal
FBbt:00015248	dorsal head epidermis anlage	414	6699	0.681	0	68h	FBbt:00015248_68h	ATAC_cat_distal
FBbt:00015252	antennal anlage in statu nascendi	306	5034	0.675	0	68h	FBbt:00015252_68h	ATAC_cat_distal
FBbt:00004204	ventral ectoderm anlage	328	5308	0.687	0	68h	FBbt:00004204_68h	ATAC_cat_distal
FBbt:00005533	ventral epidermis primordium	517	7810	0.734	0	68h	FBbt:00005533_68h	ATAC_cat_distal
FBbt:00001369	neuroblast of ventral nerve cord primordium	155	2895	0.595	0	68h	FBbt:00001369_68h	ATAC_cat_distal
FBbt:00000128	trunk mesoderm	576	8538	0.748	0	68h	FBbt:00000128_68h	ATAC_cat_distal
FBbt:00005673	lateral cord glial cell	131	2522	0.577	0	68h	FBbt:00005673_68h	ATAC_cat_distal
noCat	unclassified	2216	23457	1.211	0	68h	noCat_68h	ATAC_cat_distal
FBbt:00005415	central brain anlage in statu nascendi	309	4996	0.689	0	68h	FBbt:00005415_68h	ATAC_cat_distal
FBbt:00015249	dorsal head epidermis anlage in statu nascendi	315	5062	0.693	0	68h	FBbt:00015249_68h	ATAC_cat_distal
FBbt:00001673	embryonic/larval dorsal vessel	194	3392	0.637	0	68h	FBbt:00001673_68h	ATAC_cat_distal
FBbt:00001333	procephalic neuroblast	117	2279	0.571	0	68h	FBbt:00001333_68h	ATAC_cat_distal
FBbt:00005425	visual anlage in statu nascendi	317	5065	0.698	0	68h	FBbt:00005425_68h	ATAC_cat_distal
FBbt:00000112	dorsal ectoderm	461	6947	0.739	0	68h	FBbt:00000112_68h	ATAC_cat_distal
FBbt:00005744	embryonic dorsal epidermis	611	8872	0.766	0	68h	FBbt:00005744_68h	ATAC_cat_distal
FBbt:0000610	early embryonic segmentation	138	2523	0.611	0	68h	FBbt:0000610_68h	ATAC_cat_distal
FBbt:00000210	anterior endoderm anlage	230	3808	0.675	0	68h	FBbt:00000210_68h	ATAC_cat_distal
FBbt:00000441	hindgut proper primordium	418	6277	0.745	0	68h	FBbt:00000441_68h	ATAC_cat_distal
FBbt:00005542	central brain primordium	771	10773	0.797	0	68h	FBbt:00005542_68h	ATAC_cat_distal
FBbt:00005630	embryonic hindgut	519	7567	0.767	0	68h	FBbt:00005630_68h	ATAC_cat_distal
FBbt:00001665	dorsal vessel primordium	42	1032	0.451	0	68h	FBbt:00001665_68h	ATAC_cat_distal
FBbt:00004993	epidermis	157	2735	0.643	0	68h	FBbt:00004993_68h	ATAC_cat_distal
FBbt:00001056	presumptive embryonic/larval central nervous system	340	5209	0.732	0	68h	FBbt:00001056_68h	ATAC_cat_distal
FBbt:00005518	somatic muscle primordium	260	4124	0.707	0	68h	FBbt:00005518_68h	ATAC_cat_distal
FBbt:00001134	presumptive embryonic/larval peripheral nervous system	117	2136	0.613	0	68h	FBbt:00001134_68h	ATAC_cat_distal
FBbt:00005678	embryonic pericardial cell	17	567	0.33	0	68h	FBbt:00005678_68h	ATAC_cat_distal
FBbt:00005526	dorsal epidermis primordium	509	7317	0.781	0	68h	FBbt:00005526_68h	ATAC_cat_distal
FBbt:00005747	embryonic ventral epidermis	538	7686	0.785	0	68h	FBbt:00005747_68h	ATAC_cat_distal
FBbt:00005606	embryonic foregut	499	7180	0.78	0	68h	FBbt:00005606_68h	ATAC_cat_distal
FBbt:00000136	mesectoderm	145	2486	0.655	0	68h	FBbt:00000136_68h	ATAC_cat_distal
FBbt:00000170	embryonic metathoracic segment	13	476	0.3	0	68h	FBbt:00000170_68h	ATAC_cat_distal
FBbt:00004980	dorsal hair	8	11	28.664	0	68h	FBbt:00004980_68h	ATAC_cat_distal
FBbt:00001102	ventral nerve cord	1048	13974	0.837	1e-06	68h	FBbt:00001102_68h	ATAC_cat_distal
FBbt:00005535	foregut primordium	372	5482	0.764	1e-06	68h	FBbt:00005535_68h	ATAC_cat_distal
FBbt:00000169	embryonic mesothoracic segment	12	444	0.296	1e-06	68h	FBbt:00000169_68h	ATAC_cat_distal
FBbt:00001667	embryonic/larval pericardial cell	48	1045	0.512	1e-06	68h	FBbt:00001667_68h	ATAC_cat_distal
FBbt:00000173	embryonic abdominal segment 1	15	490	0.337	1e-06	68h	FBbt:00000173_68h	ATAC_cat_distal
FBbt:00005675	lateral cord neuron	239	3713	0.726	1e-06	68h	FBbt:00005675_68h	ATAC_cat_distal
FBbt:00005466	pericardial cell primordium	10	388	0.283	2e-06	68h	FBbt:00005466_68h	ATAC_cat_distal
FBbt:00005423	foregut anlage in statu nascendi	83	1539	0.605	3e-06	68h	FBbt:00005423_68h	ATAC_cat_distal
FBbt:00005619	embryonic labial sensory complex	98	720	1.704	4e-06	68h	FBbt:00005619_68h	ATAC_cat_distal
FBbt:00005523	inclusive hindgut primordium	250	3803	0.743	5e-06	68h	FBbt:00005523_68h	ATAC_cat_distal
FBbt:00001891	embryonic/larval hindgut	138	2292	0.679	5e-06	68h	FBbt:00001891_68h	ATAC_cat_distal
FBbt:00001664	embryonic/larval circulatory system	115	1969	0.658	6e-06	68h	FBbt:00001664_68h	ATAC_cat_distal
FBbt:00005613	embryonic hypopharynx	280	4186	0.756	6e-06	68h	FBbt:00005613_68h	ATAC_cat_distal
FBbt:00000458	midgut constriction 1	15	462	0.358	8e-06	68h	FBbt:00000458_68h	ATAC_cat_distal
FBbt:00000303	embryonic/larval spiracular branch	24	108	3.076	1.1e-05	68h	FBbt:00000303_68h	ATAC_cat_distal
FBbt:00000276	embryonic/larval dorsal anastomosis	24	108	3.076	1.1e-05	68h	FBbt:00000276_68h	ATAC_cat_distal
FBbt:00001834	imaginal ring	24	108	3.076	1.1e-05	68h	FBbt:00001834_68h	ATAC_cat_distal
FBbt:00001069	embryonic stomatogastric nervous system	82	1482	0.623	1.4e-05	68h	FBbt:00001069_68h	ATAC_cat_distal
FBbt:00005552	ventral sensory complex primordium	123	2038	0.682	2.2e-05	68h	FBbt:00005552_68h	ATAC_cat_distal
FBbt:00005431	foregut anlage	123	2040	0.681	2.2e-05	68h	FBbt:00005431_68h	ATAC_cat_distal
FBbt:00005538	clypeo-labral primordium	280	4126	0.769	2.4e-05	68h	FBbt:00005538_68h	ATAC_cat_distal
FBbt:00001882	embryonic/larval midgut	587	8022	0.828	2.5e-05	68h	FBbt:00001882_68h	ATAC_cat_distal
FBbt:00005665	embryonic central brain neuron	218	3306	0.747	2.7e-05	68h	FBbt:00005665_68h	ATAC_cat_distal
FBbt:00005123	motor neuron	29	666	0.486	3.5e-05	68h	FBbt:00005123_68h	ATAC_cat_distal
FBbt:00005550	proventriculus primordium	112	1868	0.678	3.6e-05	68h	FBbt:00005550_68h	ATAC_cat_distal
FBbt:00005663	embryonic central brain glial cell	132	2137	0.699	4.7e-05	68h	FBbt:00005663_68h	ATAC_cat_distal
FBbt:00004202	hindgut anlage	193	2951	0.741	4.9e-05	68h	FBbt:00004202_68h	ATAC_cat_distal
FBbt:00005503	hypopharynx inclusive primordium	30	668	0.502	6.6e-05	68h	FBbt:00005503_68h	ATAC_cat_distal
FBbt:00000174	embryonic abdominal segment 2	10	331	0.333	7e-05	68h	FBbt:00000174_68h	ATAC_cat_distal
FBbt:00005745	embryonic dorsal apodeme	32	698	0.513	7.1e-05	68h	FBbt:00005745_68h	ATAC_cat_distal
FBbt:00000439	stomodeum	57	1067	0.601	8.2e-05	68h	FBbt:00000439_68h	ATAC_cat_distal
FBbt:00000179	embryonic abdominal segment 7	9	309	0.321	9e-05	68h	FBbt:00000179_68h	ATAC_cat_distal
FBbt:10005329	posterior midgut primordium	527	7185	0.832	9.8e-05	68h	FBbt:10005329_68h	ATAC_cat_distal
FBbt:00005643	embryonic Malpighian tubule tip cell	7	264	0.291	0.000148	68h	FBbt:00005643_68h	ATAC_cat_distal
FBbt:00000336	embryonic/larval ventral anastomosis	24	125	2.558	0.000148	68h	FBbt:00000336_68h	ATAC_cat_distal
FBbt:00005103	commissure	15	400	0.416	0.000211	68h	FBbt:00005103_68h	ATAC_cat_distal
FBbt:00000464	embryonic/larval somatic muscle	239	3484	0.78	0.000223	68h	FBbt:00000464_68h	ATAC_cat_distal
FBbt:00005212	bipolar dendrite neuron	9	298	0.333	0.00023	68h	FBbt:00005212_68h	ATAC_cat_distal
FBbt:00000093	ventral midline	305	4322	0.803	0.000263	68h	FBbt:00000093_68h	ATAC_cat_distal
FBbt:00000444	anterior midgut primordium	463	6297	0.837	0.000378	68h	FBbt:00000444_68h	ATAC_cat_distal
FBbt:00005101	fascicle	11	322	0.378	0.000408	68h	FBbt:00005101_68h	ATAC_cat_distal
FBbt:00016002	hypopharynx proper primordium	58	1030	0.636	0.000474	68h	FBbt:00016002_68h	ATAC_cat_distal
FBbt:00002831	abdominal lateral pentascolopidial chordotonal organ lch5	7	246	0.313	0.000517	68h	FBbt:00002831_68h	ATAC_cat_distal
FBbt:00001911	embryonic/larval nervous system	643	8502	0.861	0.000543	68h	FBbt:00001911_68h	ATAC_cat_distal
FBbt:00005037	tracheal primordium	240	3451	0.792	0.000548	68h	FBbt:00005037_68h	ATAC_cat_distal
FBbt:00007281	epiphysis	100	830	1.48	0.000549	68h	FBbt:00007281_68h	ATAC_cat_distal
FBbt:00005442	hypopharynx anlage	31	634	0.549	0.000568	68h	FBbt:00005442_68h	ATAC_cat_distal
FBbt:00000167	embryonic thoracic segment	20	461	0.485	0.000572	68h	FBbt:00000167_68h	ATAC_cat_distal
FBbt:00005617	labral sensory complex	106	895	1.451	0.000574	68h	FBbt:00005617_68h	ATAC_cat_distal
FBbt:00005094	central nervous system	111	1751	0.72	0.000691	68h	FBbt:00005094_68h	ATAC_cat_distal
FBbt:00005746	embryonic leading edge cell	60	1046	0.649	0.00078	68h	FBbt:00005746_68h	ATAC_cat_distal
FBbt:00005805	Bolwig organ	46	848	0.612	0.000791	68h	FBbt:00005805_68h	ATAC_cat_distal
FBbt:00005413	anlage in statu nascendi	242	3450	0.8	0.000869	68h	FBbt:00005413_68h	ATAC_cat_distal
FBbt:00000096	ventral furrow	43	801	0.606	0.000888	68h	FBbt:00000096_68h	ATAC_cat_distal
FBbt:00005214	tracheal innervating neuron	9	270	0.369	0.000962	68h	FBbt:00005214_68h	ATAC_cat_distal
FBbt:00007275	class IV dendritic arborizing neuron	9	270	0.369	0.000962	68h	FBbt:00007275_68h	ATAC_cat_distal
FBbt:00005519	visceral muscle primordium	293	4095	0.817	0.001047	68h	FBbt:00005519_68h	ATAC_cat_distal
FBbt:00005605	imaginal tracheal precursor	30	192	1.993	0.001097	68h	FBbt:00005605_68h	ATAC_cat_distal
FBbt:00005749	embryonic ventral apodeme	36	687	0.591	0.001207	68h	FBbt:00005749_68h	ATAC_cat_distal
FBbt:00005124	sensory neuron	30	595	0.567	0.001454	68h	FBbt:00005124_68h	ATAC_cat_distal
FBbt:00005662	embryonic central brain	47	836	0.636	0.001774	68h	FBbt:00005662_68h	ATAC_cat_distal
FBbt:00000166	embryonic thorax	12	310	0.431	0.002044	68h	FBbt:00000166_68h	ATAC_cat_distal
FBbt:00005043	trachea	16	375	0.477	0.002056	68h	FBbt:00005043_68h	ATAC_cat_distal
FBbt:00017019	cibarium primordium	186	2688	0.79	0.00209	68h	FBbt:00017019_68h	ATAC_cat_distal
FBbt:00004860	germline cell	98	846	1.414	0.002309	68h	FBbt:00004860_68h	ATAC_cat_distal
FBbt:00005534	gnathal primordium	237	3334	0.813	0.002417	68h	FBbt:00005534_68h	ATAC_cat_distal
FBbt:00000097	cephalic furrow	93	1455	0.728	0.002713	68h	FBbt:00000097_68h	ATAC_cat_distal
FBbt:00000109	mesectoderm anlage	39	709	0.622	0.002834	68h	FBbt:00000109_68h	ATAC_cat_distal
FBbt:00000462	embryonic/larval muscle system	252	3508	0.822	0.003064	68h	FBbt:00000462_68h	ATAC_cat_distal
FBbt:00001920	embryonic/larval brain	129	1925	0.765	0.003193	68h	FBbt:00001920_68h	ATAC_cat_distal
FBbt:00005560	posterior endoderm	345	4672	0.845	0.003499	68h	FBbt:00005560_68h	ATAC_cat_distal
FBbt:00000460	midgut constriction 3	11	280	0.438	0.003589	68h	FBbt:00000460_68h	ATAC_cat_distal
FBbt:00015254	ventral head epidermis	11	282	0.434	0.003633	68h	FBbt:00015254_68h	ATAC_cat_distal
FBbt:00000160	embryonic antennal segment	24	483	0.559	0.004014	68h	FBbt:00000160_68h	ATAC_cat_distal
FBbt:00005475	embryonic leading edge cell primordium	19	404	0.528	0.004079	68h	FBbt:00005475_68h	ATAC_cat_distal
FBbt:00001871	embryonic/larval proventriculus	213	2995	0.814	0.0043	68h	FBbt:00001871_68h	ATAC_cat_distal
FBbt:00000127	head mesoderm	417	5544	0.862	0.004693	68h	FBbt:00000127_68h	ATAC_cat_distal
FBbt:00005631	embryonic small intestine	35	632	0.627	0.005172	68h	FBbt:00005631_68h	ATAC_cat_distal
FBbt:00005509	embryonic dorsal pouch primordium	4	151	0.291	0.005259	68h	FBbt:00005509_68h	ATAC_cat_distal
FBbt:00000177	embryonic abdominal segment 5	7	204	0.381	0.005504	68h	FBbt:00000177_68h	ATAC_cat_distal
FBbt:00004891	pole plasm	90	794	1.379	0.005841	68h	FBbt:00004891_68h	ATAC_cat_distal
FBbt:00005511	pars intercerebralis primordium	32	586	0.618	0.005865	68h	FBbt:00005511_68h	ATAC_cat_distal
FBbt:0000611	NA	343	3497	1.179	0.006009	68h	FBbt:0000611_68h	ATAC_cat_distal
FBbt:00005083	myoblast	31	570	0.615	0.006522	68h	FBbt:00005083_68h	ATAC_cat_distal
FBbt:00016008	anal pad primordium	56	915	0.696	0.007213	68h	FBbt:00016008_68h	ATAC_cat_distal
FBbt:00005089	muscle attachment site	53	877	0.687	0.007231	68h	FBbt:00005089_68h	ATAC_cat_distal
FBbt:00000186	embryonic optic lobe primordium	150	2154	0.797	0.007511	68h	FBbt:00000186_68h	ATAC_cat_distal
FBbt:00000233	embryonic/larval lateral trunk	2	105	0.208	0.008284	68h	FBbt:00000233_68h	ATAC_cat_distal
FBbt:00017010	dorsal trunk primordium	10	248	0.45	0.008376	68h	FBbt:00017010_68h	ATAC_cat_distal
FBbt:00005553	dorsal sensory complex primordium	59	952	0.706	0.008381	68h	FBbt:00005553_68h	ATAC_cat_distal
FBbt:00005387	embryonic nervous system of thorax	10	250	0.446	0.008508	68h	FBbt:00005387_68h	ATAC_cat_distal
FBbt:00005634	embryonic Malpighian tubule	201	2796	0.824	0.009253	68h	FBbt:00005634_68h	ATAC_cat_distal
FBbt:00005510	antennal primordium	332	7176	0.623	0	1012h	FBbt:00005510_1012h	ATAC_cat_distal
FBbt:00015256	central brain anlage	327	7066	0.624	0	1012h	FBbt:00015256_1012h	ATAC_cat_distal
FBbt:00015247	dorsal head epidermis primordium	347	7377	0.634	0	1012h	FBbt:00015247_1012h	ATAC_cat_distal
FBbt:00014203	lateral head epidermis primordium	342	7278	0.634	0	1012h	FBbt:00014203_1012h	ATAC_cat_distal
FBbt:00005428	dorsal ectoderm anlage	301	6567	0.619	0	1012h	FBbt:00005428_1012h	ATAC_cat_distal
FBbt:00005558	ventral ectoderm	561	10871	0.692	0	1012h	FBbt:00005558_1012h	ATAC_cat_distal
FBbt:00015253	antennal anlage	316	6798	0.628	0	1012h	FBbt:00015253_1012h	ATAC_cat_distal
FBbt:00015248	dorsal head epidermis anlage	318	6809	0.631	0	1012h	FBbt:00015248_1012h	ATAC_cat_distal
FBbt:00001059	visual primordium	320	6820	0.634	0	1012h	FBbt:00001059_1012h	ATAC_cat_distal
FBbt:00005434	visual anlage	323	6871	0.635	0	1012h	FBbt:00005434_1012h	ATAC_cat_distal
FBbt:00015255	ventral head epidermis primordium	348	7294	0.645	0	1012h	FBbt:00015255_1012h	ATAC_cat_distal
FBbt:00004204	ventral ectoderm anlage	251	5425	0.629	0	1012h	FBbt:00004204_1012h	ATAC_cat_distal
FBbt:00005427	ectoderm anlage	394	7818	0.684	0	1012h	FBbt:00005427_1012h	ATAC_cat_distal
FBbt:00005542	central brain primordium	619	11446	0.73	0	1012h	FBbt:00005542_1012h	ATAC_cat_distal
FBbt:00015249	dorsal head epidermis anlage in statu nascendi	237	5163	0.625	0	1012h	FBbt:00015249_1012h	ATAC_cat_distal
FBbt:00005554	ventral nerve cord primordium	616	11323	0.736	0	1012h	FBbt:00005554_1012h	ATAC_cat_distal
FBbt:00005415	central brain anlage in statu nascendi	237	5086	0.636	0	1012h	FBbt:00005415_1012h	ATAC_cat_distal
FBbt:00015252	antennal anlage in statu nascendi	241	5107	0.644	0	1012h	FBbt:00015252_1012h	ATAC_cat_distal
FBbt:00005425	visual anlage in statu nascendi	244	5145	0.648	0	1012h	FBbt:00005425_1012h	ATAC_cat_distal
FBbt:00005673	lateral cord glial cell	113	2728	0.567	0	1012h	FBbt:00005673_1012h	ATAC_cat_distal
FBbt:0000610	early embryonic segmentation	107	2589	0.567	0	1012h	FBbt:0000610_1012h	ATAC_cat_distal
FBbt:00005413	anlage in statu nascendi	171	3690	0.637	0	1012h	FBbt:00005413_1012h	ATAC_cat_distal
FBbt:00005518	somatic muscle primordium	226	4585	0.678	0	1012h	FBbt:00005518_1012h	ATAC_cat_distal
FBbt:00000112	dorsal ectoderm	396	7300	0.746	0	1012h	FBbt:00000112_1012h	ATAC_cat_distal
FBbt:00001332	embryonic neuroblast	117	2639	0.61	0	1012h	FBbt:00001332_1012h	ATAC_cat_distal
FBbt:00001333	procephalic neuroblast	96	2220	0.596	0	1012h	FBbt:00001333_1012h	ATAC_cat_distal
FBbt:00000104	mesoderm anlage	247	4785	0.713	0	1012h	FBbt:00000104_1012h	ATAC_cat_distal
FBbt:00004202	hindgut anlage	146	3087	0.653	0	1012h	FBbt:00004202_1012h	ATAC_cat_distal
FBbt:00005675	lateral cord neuron	208	4075	0.706	1e-06	1012h	FBbt:00005675_1012h	ATAC_cat_distal
FBbt:00005541	cardiogenic mesoderm	90	2054	0.605	1e-06	1012h	FBbt:00005541_1012h	ATAC_cat_distal
FBbt:00005519	visceral muscle primordium	253	4732	0.741	3e-06	1012h	FBbt:00005519_1012h	ATAC_cat_distal
FBbt:00005613	embryonic hypopharynx	270	5011	0.747	3e-06	1012h	FBbt:00005613_1012h	ATAC_cat_distal
FBbt:00005665	embryonic central brain neuron	189	3670	0.714	4e-06	1012h	FBbt:00005665_1012h	ATAC_cat_distal
FBbt:00005535	foregut primordium	331	5968	0.769	4e-06	1012h	FBbt:00005535_1012h	ATAC_cat_distal
FBbt:00005531	salivary gland duct primordium	42	284	2.329	6e-06	1012h	FBbt:00005531_1012h	ATAC_cat_distal
FBbt:00000128	trunk mesoderm	542	9210	0.815	1e-05	1012h	FBbt:00000128_1012h	ATAC_cat_distal
FBbt:00005523	inclusive hindgut primordium	214	4042	0.735	1e-05	1012h	FBbt:00005523_1012h	ATAC_cat_distal
FBbt:00001102	ventral nerve cord	974	15728	0.853	1.3e-05	1012h	FBbt:00001102_1012h	ATAC_cat_distal
FBbt:00005663	embryonic central brain glial cell	109	2283	0.662	1.3e-05	1012h	FBbt:00005663_1012h	ATAC_cat_distal
FBbt:00000441	hindgut proper primordium	402	6992	0.799	1.9e-05	1012h	FBbt:00000441_1012h	ATAC_cat_distal
FBbt:00005606	embryonic foregut	494	8413	0.815	2e-05	1012h	FBbt:00005606_1012h	ATAC_cat_distal
FBbt:00005212	bipolar dendrite neuron	4	280	0.193	2.9e-05	1012h	FBbt:00005212_1012h	ATAC_cat_distal
FBbt:00001056	presumptive embryonic/larval central nervous system	325	5733	0.789	3.9e-05	1012h	FBbt:00001056_1012h	ATAC_cat_distal
FBbt:00000090	dorsal ridge	6	327	0.249	4.3e-05	1012h	FBbt:00000090_1012h	ATAC_cat_distal
FBbt:00005511	pars intercerebralis primordium	20	627	0.438	5.3e-05	1012h	FBbt:00005511_1012h	ATAC_cat_distal
FBbt:00005124	sensory neuron	18	589	0.419	5.9e-05	1012h	FBbt:00005124_1012h	ATAC_cat_distal
noCat	unclassified	2134	28692	1.126	6e-05	1012h	noCat_1012h	ATAC_cat_distal
FBbt:00005423	foregut anlage in statu nascendi	67	1498	0.62	6.1e-05	1012h	FBbt:00005423_1012h	ATAC_cat_distal
FBbt:00000210	anterior endoderm anlage	226	4134	0.762	6.4e-05	1012h	FBbt:00000210_1012h	ATAC_cat_distal
FBbt:00005536	stomatogastric nervous system primordium	73	1603	0.632	6.9e-05	1012h	FBbt:00005536_1012h	ATAC_cat_distal
FBbt:00005552	ventral sensory complex primordium	113	2260	0.696	0.00011	1012h	FBbt:00005552_1012h	ATAC_cat_distal
FBbt:00005526	dorsal epidermis primordium	466	7835	0.829	0.00014	1012h	FBbt:00005526_1012h	ATAC_cat_distal
FBbt:00005533	ventral epidermis primordium	485	8127	0.831	0.000148	1012h	FBbt:00005533_1012h	ATAC_cat_distal
FBbt:00005214	tracheal innervating neuron	4	253	0.214	0.00016	1012h	FBbt:00005214_1012h	ATAC_cat_distal
FBbt:00007275	class IV dendritic arborizing neuron	4	253	0.214	0.00016	1012h	FBbt:00007275_1012h	ATAC_cat_distal
FBbt:00005424	hindgut anlage in statu nascendi	67	1459	0.638	0.000178	1012h	FBbt:00005424_1012h	ATAC_cat_distal
FBbt:00000177	embryonic abdominal segment 5	2	194	0.139	0.000183	1012h	FBbt:00000177_1012h	ATAC_cat_distal
FBbt:00000170	embryonic metathoracic segment	14	475	0.404	0.000188	1012h	FBbt:00000170_1012h	ATAC_cat_distal
FBbt:00001369	neuroblast of ventral nerve cord primordium	158	2957	0.746	0.000296	1012h	FBbt:00001369_1012h	ATAC_cat_distal
FBbt:00005431	foregut anlage	102	2031	0.7	0.000334	1012h	FBbt:00005431_1012h	ATAC_cat_distal
FBbt:00005631	embryonic small intestine	28	738	0.524	0.000345	1012h	FBbt:00005631_1012h	ATAC_cat_distal
FBbt:00005747	embryonic ventral epidermis	557	9142	0.85	0.000401	1012h	FBbt:00005747_1012h	ATAC_cat_distal
FBbt:00000169	embryonic mesothoracic segment	13	438	0.407	0.000442	1012h	FBbt:00000169_1012h	ATAC_cat_distal
FBbt:00001060	embryonic brain	819	13058	0.873	0.000513	1012h	FBbt:00001060_1012h	ATAC_cat_distal
FBbt:00005744	embryonic dorsal epidermis	656	10613	0.862	0.000525	1012h	FBbt:00005744_1012h	ATAC_cat_distal
FBbt:00015246	dorsal head epidermis	52	1153	0.627	0.000567	1012h	FBbt:00015246_1012h	ATAC_cat_distal
FBbt:00000164	embryonic maxillary segment	34	834	0.565	0.000593	1012h	FBbt:00000164_1012h	ATAC_cat_distal
FBbt:00005741	embryonic head epidermis	406	6796	0.835	0.000661	1012h	FBbt:00005741_1012h	ATAC_cat_distal
FBbt:00001664	embryonic/larval circulatory system	115	2214	0.725	0.000682	1012h	FBbt:00001664_1012h	ATAC_cat_distal
FBbt:00001069	embryonic stomatogastric nervous system	78	1594	0.682	0.000702	1012h	FBbt:00001069_1012h	ATAC_cat_distal
FBbt:00005667	embryonic central brain pars intercerebralis	17	503	0.465	0.000779	1012h	FBbt:00005667_1012h	ATAC_cat_distal
FBbt:00005643	embryonic Malpighian tubule tip cell	8	318	0.344	0.000811	1012h	FBbt:00005643_1012h	ATAC_cat_distal
FBbt:00000173	embryonic abdominal segment 1	16	480	0.459	0.000822	1012h	FBbt:00000173_1012h	ATAC_cat_distal
FBbt:00000439	stomodeum	50	1098	0.633	0.000997	1012h	FBbt:00000439_1012h	ATAC_cat_distal
FBbt:00005037	tracheal primordium	220	3875	0.795	0.001045	1012h	FBbt:00005037_1012h	ATAC_cat_distal
FBbt:00005101	fascicle	8	312	0.35	0.001085	1012h	FBbt:00005101_1012h	ATAC_cat_distal
FBbt:00017008	longitudinal visceral muscle primordium	65	1351	0.671	0.001185	1012h	FBbt:00017008_1012h	ATAC_cat_distal
FBbt:00001134	presumptive embryonic/larval peripheral nervous system	126	2346	0.752	0.001707	1012h	FBbt:00001134_1012h	ATAC_cat_distal
FBbt:00001704	embryonic/larval fat body	184	2106	1.289	0.001738	1012h	FBbt:00001704_1012h	ATAC_cat_distal
FBbt:00007281	epiphysis	84	855	1.463	0.001809	1012h	FBbt:00007281_1012h	ATAC_cat_distal
FBbt:00001911	embryonic/larval nervous system	604	9695	0.872	0.002024	1012h	FBbt:00001911_1012h	ATAC_cat_distal
FBbt:00001881	embryonic/larval salivary gland common duct	44	395	1.68	0.00204	1012h	FBbt:00001881_1012h	ATAC_cat_distal
FBbt:00005103	commissure	16	457	0.483	0.002217	1012h	FBbt:00005103_1012h	ATAC_cat_distal
FBbt:00004891	pole plasm	100	1058	1.402	0.002287	1012h	FBbt:00004891_1012h	ATAC_cat_distal
FBbt:00000166	embryonic thorax	9	316	0.39	0.002533	1012h	FBbt:00000166_1012h	ATAC_cat_distal
FBbt:00005553	dorsal sensory complex primordium	44	959	0.639	0.002634	1012h	FBbt:00005553_1012h	ATAC_cat_distal
FBbt:00007593	fused midgut primordium	24	181	2.046	0.002912	1012h	FBbt:00007593_1012h	ATAC_cat_distal
FBbt:00005672	lateral cord	25	614	0.565	0.003144	1012h	FBbt:00005672_1012h	ATAC_cat_distal
FBbt:00017011	primary segmental branch primordium	5	222	0.307	0.003272	1012h	FBbt:00017011_1012h	ATAC_cat_distal
FBbt:00005452	midgut interstitial cell primordium	24	185	1.995	0.003319	1012h	FBbt:00005452_1012h	ATAC_cat_distal
FBbt:00001673	embryonic/larval dorsal vessel	219	3773	0.815	0.003458	1012h	FBbt:00001673_1012h	ATAC_cat_distal
FBbt:00005828	embryonic head sensory system	241	4112	0.823	0.003701	1012h	FBbt:00005828_1012h	ATAC_cat_distal
FBbt:00000180	embryonic abdominal segment 8	10	320	0.43	0.004064	1012h	FBbt:00000180_1012h	ATAC_cat_distal
FBbt:00005678	embryonic pericardial cell	22	551	0.553	0.00417	1012h	FBbt:00005678_1012h	ATAC_cat_distal
FBbt:00005043	trachea	14	403	0.479	0.004182	1012h	FBbt:00005043_1012h	ATAC_cat_distal
FBbt:00000099	posterior transverse furrow	9	298	0.415	0.004234	1012h	FBbt:00000099_1012h	ATAC_cat_distal
FBbt:00002831	abdominal lateral pentascolopidial chordotonal organ lch5	6	235	0.349	0.004452	1012h	FBbt:00002831_1012h	ATAC_cat_distal
FBbt:00005550	proventriculus primordium	106	1966	0.756	0.004629	1012h	FBbt:00005550_1012h	ATAC_cat_distal
FBbt:00005617	labral sensory complex	87	924	1.395	0.005039	1012h	FBbt:00005617_1012h	ATAC_cat_distal
FBbt:00001303	neuropil associated CNS glial cell	3	6	13.361	0.005758	1012h	FBbt:00001303_1012h	ATAC_cat_distal
FBbt:00005599	primordium of embryonic/larval spiracle	3	6	13.361	0.005758	1012h	FBbt:00005599_1012h	ATAC_cat_distal
FBbt:00000168	embryonic prothoracic segment	12	350	0.473	0.006063	1012h	FBbt:00000168_1012h	ATAC_cat_distal
FBbt:00005123	motor neuron	32	721	0.618	0.006344	1012h	FBbt:00005123_1012h	ATAC_cat_distal
FBbt:00017000	amnioserosa primordium	62	1228	0.706	0.006586	1012h	FBbt:00017000_1012h	ATAC_cat_distal
FBbt:00001138	C1 chordotonal organ precursor cell	1	107	0.126	0.006977	1012h	FBbt:00001138_1012h	ATAC_cat_distal
FBbt:00005624	embryonic/larval midgut primordium	23	556	0.574	0.007201	1012h	FBbt:00005624_1012h	ATAC_cat_distal
FBbt:00004860	germline cell	98	1082	1.337	0.008062	1012h	FBbt:00004860_1012h	ATAC_cat_distal
FBbt:00001665	dorsal vessel primordium	60	1187	0.707	0.008082	1012h	FBbt:00001665_1012h	ATAC_cat_distal
FBbt:00005670	embryonic esophageal ganglion	6	226	0.363	0.008161	1012h	FBbt:00005670_1012h	ATAC_cat_distal
FBbt:00016001	hypopharyngeal sense organ primordium	18	134	2.076	0.009385	1012h	FBbt:00016001_1012h	ATAC_cat_distal
NA	NA	NA	NA	NA	NA	NA	NA	NA
GO:0042066	perineurial glial growth	19	32	21.05	0	24h	GO:0042066_24h	ATAC_cat_distal
GO:0018401	peptidyl-proline hydroxylation to 4-hydroxy-L-proline	13	33	9.341	0	24h	GO:0018401_24h	ATAC_cat_distal
GO:0035199	salt aversion	6	6	Inf	0	24h	GO:0035199_24h	ATAC_cat_distal
GO:0038056	negative regulation of BMP signaling pathway by negative regulation of BMP secretion	6	6	Inf	0	24h	GO:0038056_24h	ATAC_cat_distal
GO:0045944	positive regulation of transcription from RNA polymerase II promoter	131	2967	0.646	0	24h	GO:0045944_24h	ATAC_cat_distal
GO:0050914	sensory perception of salty taste	6	7	86.068	1e-06	24h	GO:0050914_24h	ATAC_cat_distal
GO:0006817	phosphate ion transport	12	35	7.495	1e-06	24h	GO:0006817_24h	ATAC_cat_distal
GO:0006355	regulation of transcription, DNA-dependent	237	4772	0.727	2e-06	24h	GO:0006355_24h	ATAC_cat_distal
GO:0007617	mating behavior	15	57	5.133	3e-06	24h	GO:0007617_24h	ATAC_cat_distal
GO:0007286	spermatid development	41	295	2.329	5e-06	24h	GO:0007286_24h	ATAC_cat_distal
GO:0045859	regulation of protein kinase activity	5	6	71.7	7e-06	24h	GO:0045859_24h	ATAC_cat_distal
GO:0000003	reproduction	8	18	11.481	8e-06	24h	GO:0000003_24h	ATAC_cat_distal
GO:0046958	nonassociative learning	8	18	11.481	8e-06	24h	GO:0046958_24h	ATAC_cat_distal
GO:0007291	sperm individualization	41	301	2.275	1e-05	24h	GO:0007291_24h	ATAC_cat_distal
GO:0007427	epithelial cell migration, open tracheal system	32	962	0.487	1.2e-05	24h	GO:0007427_24h	ATAC_cat_distal
GO:0001661	conditioned taste aversion	8	19	10.437	1.3e-05	24h	GO:0001661_24h	ATAC_cat_distal
GO:0007509	mesoderm migration involved in gastrulation	3	280	0.154	1.5e-05	24h	GO:0007509_24h	ATAC_cat_distal
GO:0009187	cyclic nucleotide metabolic process	8	20	9.567	2e-05	24h	GO:0009187_24h	ATAC_cat_distal
GO:0007399	nervous system development	56	1414	0.583	3.1e-05	24h	GO:0007399_24h	ATAC_cat_distal
GO:0030182	neuron differentiation	2	225	0.128	6.3e-05	24h	GO:0030182_24h	ATAC_cat_distal
GO:0007417	central nervous system development	58	1421	0.602	6.6e-05	24h	GO:0007417_24h	ATAC_cat_distal
GO:0006357	regulation of transcription from RNA polymerase II promoter	82	1845	0.657	0.000117	24h	GO:0006357_24h	ATAC_cat_distal
GO:0007507	heart development	72	1664	0.639	0.000118	24h	GO:0007507_24h	ATAC_cat_distal
GO:0048675	axon extension	61	567	1.741	0.000148	24h	GO:0048675_24h	ATAC_cat_distal
GO:0007525	somatic muscle development	22	682	0.473	0.000165	24h	GO:0007525_24h	ATAC_cat_distal
GO:0007432	salivary gland boundary specification	18	602	0.438	0.000166	24h	GO:0007432_24h	ATAC_cat_distal
GO:0003384	apical constriction involved in gastrulation	6	15	9.561	0.000231	24h	GO:0003384_24h	ATAC_cat_distal
GO:0008406	gonad development	40	1030	0.573	0.000264	24h	GO:0008406_24h	ATAC_cat_distal
GO:0008202	steroid metabolic process	3	3	Inf	0.000278	24h	GO:0008202_24h	ATAC_cat_distal
GO:0007415	defasciculation of motor neuron axon	11	50	4.049	0.000313	24h	GO:0007415_24h	ATAC_cat_distal
GO:0048639	positive regulation of developmental growth	6	16	8.605	0.000349	24h	GO:0048639_24h	ATAC_cat_distal
GO:0001764	neuron migration	3	224	0.194	0.000354	24h	GO:0001764_24h	ATAC_cat_distal
GO:0006457	protein folding	18	113	2.723	0.000381	24h	GO:0006457_24h	ATAC_cat_distal
GO:0009253	peptidoglycan catabolic process	5	11	11.949	0.000391	24h	GO:0009253_24h	ATAC_cat_distal
GO:0016045	detection of bacterium	5	11	11.949	0.000391	24h	GO:0016045_24h	ATAC_cat_distal
GO:0007494	midgut development	38	975	0.575	0.000489	24h	GO:0007494_24h	ATAC_cat_distal
GO:0042659	regulation of cell fate specification	22	649	0.499	0.000547	24h	GO:0042659_24h	ATAC_cat_distal
GO:0008306	associative learning	8	31	4.99	0.000663	24h	GO:0008306_24h	ATAC_cat_distal
GO:0008078	mesodermal cell migration	3	213	0.204	0.000707	24h	GO:0008078_24h	ATAC_cat_distal
GO:0051781	positive regulation of cell division	6	18	7.171	0.000722	24h	GO:0051781_24h	ATAC_cat_distal
GO:0035282	segmentation	13	449	0.424	0.000738	24h	GO:0035282_24h	ATAC_cat_distal
GO:0007383	specification of segmental identity, antennal segment	12	426	0.413	0.000765	24h	GO:0007383_24h	ATAC_cat_distal
GO:0007438	oenocyte development	2	182	0.159	0.000776	24h	GO:0007438_24h	ATAC_cat_distal
GO:0007367	segment polarity determination	22	639	0.507	0.000885	24h	GO:0007367_24h	ATAC_cat_distal
GO:0007506	gonadal mesoderm development	5	259	0.281	0.000932	24h	GO:0007506_24h	ATAC_cat_distal
GO:0046534	positive regulation of photoreceptor cell differentiation	5	13	8.961	0.000976	24h	GO:0046534_24h	ATAC_cat_distal
GO:0048644	muscle organ morphogenesis	3	207	0.21	0.000995	24h	GO:0048644_24h	ATAC_cat_distal
GO:2000274	regulation of epithelial cell migration, open tracheal system	3	209	0.208	0.001021	24h	GO:2000274_24h	ATAC_cat_distal
GO:0022409	positive regulation of cell-cell adhesion	3	209	0.208	0.001021	24h	GO:0022409_24h	ATAC_cat_distal
GO:0014019	neuroblast development	13	439	0.434	0.001257	24h	GO:0014019_24h	ATAC_cat_distal
GO:0042332	gravitaxis	21	153	2.287	0.001384	24h	GO:0042332_24h	ATAC_cat_distal
GO:0007605	sensory perception of sound	7	304	0.336	0.001461	24h	GO:0007605_24h	ATAC_cat_distal
GO:0007275	multicellular organismal development	18	125	2.417	0.001502	24h	GO:0007275_24h	ATAC_cat_distal
GO:0006810	transport	17	113	2.544	0.001543	24h	GO:0006810_24h	ATAC_cat_distal
GO:0030707	ovarian follicle cell development	43	1021	0.624	0.001658	24h	GO:0030707_24h	ATAC_cat_distal
GO:0017148	negative regulation of translation	41	382	1.731	0.001712	24h	GO:0017148_24h	ATAC_cat_distal
GO:0018992	germ-line sex determination	4	9	11.467	0.00175	24h	GO:0018992_24h	ATAC_cat_distal
GO:0003151	outflow tract morphogenesis	5	248	0.293	0.001759	24h	GO:0003151_24h	ATAC_cat_distal
GO:0016079	synaptic vesicle exocytosis	12	70	2.97	0.001802	24h	GO:0016079_24h	ATAC_cat_distal
GO:0006950	response to stress	9	44	3.689	0.001872	24h	GO:0006950_24h	ATAC_cat_distal
GO:0008584	male gonad development	3	192	0.226	0.001934	24h	GO:0008584_24h	ATAC_cat_distal
GO:0007034	vacuolar transport	3	5	21.495	0.002515	24h	GO:0007034_24h	ATAC_cat_distal
GO:0007614	short-term memory	19	138	2.294	0.002593	24h	GO:0007614_24h	ATAC_cat_distal
GO:0019933	cAMP-mediated signaling	8	38	3.825	0.002735	24h	GO:0019933_24h	ATAC_cat_distal
GO:0007442	hindgut morphogenesis	12	395	0.446	0.002858	24h	GO:0007442_24h	ATAC_cat_distal
GO:0008354	germ cell migration	16	483	0.488	0.002863	24h	GO:0008354_24h	ATAC_cat_distal
GO:0035239	tube morphogenesis	5	238	0.306	0.003361	24h	GO:0035239_24h	ATAC_cat_distal
GO:0016055	Wnt receptor signaling pathway	38	904	0.624	0.003364	24h	GO:0016055_24h	ATAC_cat_distal
GO:0019731	antibacterial humoral response	13	85	2.592	0.003391	24h	GO:0019731_24h	ATAC_cat_distal
GO:0009653	anatomical structure morphogenesis	11	66	2.87	0.003454	24h	GO:0009653_24h	ATAC_cat_distal
GO:0045927	positive regulation of growth	9	48	3.311	0.003502	24h	GO:0045927_24h	ATAC_cat_distal
GO:0019099	female germ-line sex determination	6	24	4.78	0.003731	24h	GO:0019099_24h	ATAC_cat_distal
GO:0000902	cell morphogenesis	11	364	0.444	0.003898	24h	GO:0000902_24h	ATAC_cat_distal
GO:0035316	non-sensory hair organization	4	11	8.19	0.004124	24h	GO:0035316_24h	ATAC_cat_distal
GO:0001558	regulation of cell growth	13	87	2.522	0.004163	24h	GO:0001558_24h	ATAC_cat_distal
GO:0035556	intracellular signal transduction	26	225	1.878	0.004252	24h	GO:0035556_24h	ATAC_cat_distal
GO:0007380	specification of segmental identity, head	9	323	0.409	0.004361	24h	GO:0007380_24h	ATAC_cat_distal
GO:0035207	negative regulation of hemocyte proliferation	0	91	0	0.004414	24h	GO:0035207_24h	ATAC_cat_distal
GO:0048098	antennal joint development	2	153	0.189	0.004579	24h	GO:0048098_24h	ATAC_cat_distal
GO:0010212	response to ionizing radiation	9	50	3.149	0.004653	24h	GO:0010212_24h	ATAC_cat_distal
GO:0035277	spiracle morphogenesis, open tracheal system	23	606	0.561	0.004714	24h	GO:0035277_24h	ATAC_cat_distal
GO:0048047	mating behavior, sex discrimination	5	18	5.514	0.004939	24h	GO:0048047_24h	ATAC_cat_distal
GO:0006584	catecholamine metabolic process	1	122	0.118	0.004973	24h	GO:0006584_24h	ATAC_cat_distal
GO:0007269	neurotransmitter secretion	27	238	1.839	0.005224	24h	GO:0007269_24h	ATAC_cat_distal
GO:0021682	nerve maturation	7	34	3.718	0.005663	24h	GO:0021682_24h	ATAC_cat_distal
GO:0008050	female courtship behavior	7	34	3.718	0.005663	24h	GO:0008050_24h	ATAC_cat_distal
GO:0007424	open tracheal system development	98	1950	0.75	0.005663	24h	GO:0007424_24h	ATAC_cat_distal
GO:0007402	ganglion mother cell fate determination	8	290	0.405	0.005816	24h	GO:0007402_24h	ATAC_cat_distal
GO:0006884	cell volume homeostasis	4	12	7.166	0.005869	24h	GO:0006884_24h	ATAC_cat_distal
GO:0006171	cAMP biosynthetic process	4	12	7.166	0.005869	24h	GO:0006171_24h	ATAC_cat_distal
GO:0019827	stem cell maintenance	14	99	2.364	0.006236	24h	GO:0019827_24h	ATAC_cat_distal
GO:0030539	male genitalia development	2	146	0.198	0.006414	24h	GO:0030539_24h	ATAC_cat_distal
GO:0042058	regulation of epidermal growth factor receptor signaling pathway	0	85	0	0.006592	24h	GO:0042058_24h	ATAC_cat_distal
GO:0042384	cilium assembly	8	44	3.187	0.007003	24h	GO:0042384_24h	ATAC_cat_distal
GO:0008345	larval locomotory behavior	19	151	2.067	0.007055	24h	GO:0008345_24h	ATAC_cat_distal
GO:0016044	cellular membrane organization	10	334	0.44	0.007137	24h	GO:0016044_24h	ATAC_cat_distal
GO:0042752	regulation of circadian rhythm	14	102	2.284	0.007532	24h	GO:0042752_24h	ATAC_cat_distal
GO:0040007	growth	8	285	0.412	0.007689	24h	GO:0040007_24h	ATAC_cat_distal
GO:0035290	trunk segmentation	8	287	0.409	0.007797	24h	GO:0035290_24h	ATAC_cat_distal
GO:0015031	protein transport	9	54	2.869	0.007819	24h	GO:0015031_24h	ATAC_cat_distal
GO:0007479	leg disc proximal/distal pattern formation	26	645	0.598	0.007899	24h	GO:0007479_24h	ATAC_cat_distal
GO:0007599	hemostasis	3	7	10.747	0.007971	24h	GO:0007599_24h	ATAC_cat_distal
GO:0045333	cellular respiration	3	7	10.747	0.007971	24h	GO:0045333_24h	ATAC_cat_distal
GO:0006464	cellular protein modification process	8	45	3.101	0.00804	24h	GO:0006464_24h	ATAC_cat_distal
GO:0002118	aggressive behavior	4	13	6.37	0.008044	24h	GO:0002118_24h	ATAC_cat_distal
GO:0016543	male courtship behavior, orientation prior to leg tapping and wing vibration	4	13	6.37	0.008044	24h	GO:0016543_24h	ATAC_cat_distal
GO:0016545	male courtship behavior, veined wing vibration	4	13	6.37	0.008044	24h	GO:0016545_24h	ATAC_cat_distal
GO:0042335	cuticle development	4	13	6.37	0.008044	24h	GO:0042335_24h	ATAC_cat_distal
GO:0048067	cuticle pigmentation	4	13	6.37	0.008044	24h	GO:0048067_24h	ATAC_cat_distal
GO:0030206	chondroitin sulfate biosynthetic process	4	13	6.37	0.008044	24h	GO:0030206_24h	ATAC_cat_distal
GO:0048103	somatic stem cell division	5	213	0.343	0.008048	24h	GO:0048103_24h	ATAC_cat_distal
GO:0035330	regulation of hippo signaling cascade	4	195	0.299	0.008048	24h	GO:0035330_24h	ATAC_cat_distal
GO:0006952	defense response	48	501	1.525	0.008103	24h	GO:0006952_24h	ATAC_cat_distal
GO:0007224	smoothened signaling pathway	17	469	0.536	0.008261	24h	GO:0007224_24h	ATAC_cat_distal
GO:0007419	ventral cord development	34	791	0.639	0.008812	24h	GO:0007419_24h	ATAC_cat_distal
GO:0001745	compound eye morphogenesis	84	1678	0.747	0.008829	24h	GO:0001745_24h	ATAC_cat_distal
GO:0035070	salivary gland histolysis	7	37	3.346	0.009138	24h	GO:0035070_24h	ATAC_cat_distal
GO:0007414	axonal defasciculation	14	105	2.208	0.00922	24h	GO:0007414_24h	ATAC_cat_distal
GO:0035331	negative regulation of hippo signaling cascade	2	142	0.204	0.009331	24h	GO:0035331_24h	ATAC_cat_distal
GO:0007527	adult somatic muscle development	0	77	0	0.009587	24h	GO:0007527_24h	ATAC_cat_distal
GO:0035050	embryonic heart tube development	20	523	0.566	0.009596	24h	GO:0035050_24h	ATAC_cat_distal
GO:0042066	perineurial glial growth	29	41	26.08	0	68h	GO:0042066_68h	ATAC_cat_distal
GO:0007507	heart development	91	2073	0.484	0	68h	GO:0007507_68h	ATAC_cat_distal
GO:0006357	regulation of transcription from RNA polymerase II promoter	119	2271	0.584	0	68h	GO:0006357_68h	ATAC_cat_distal
GO:0071229	cellular response to acid	9	10	96.764	0	68h	GO:0071229_68h	ATAC_cat_distal
GO:0042659	regulation of cell fate specification	24	750	0.352	0	68h	GO:0042659_68h	ATAC_cat_distal
GO:0008406	gonad development	53	1227	0.479	0	68h	GO:0008406_68h	ATAC_cat_distal
GO:0050907	detection of chemical stimulus involved in sensory perception	12	20	16.135	0	68h	GO:0050907_68h	ATAC_cat_distal
GO:0016045	detection of bacterium	12	20	16.135	0	68h	GO:0016045_68h	ATAC_cat_distal
GO:0009253	peptidoglycan catabolic process	12	21	14.342	0	68h	GO:0009253_68h	ATAC_cat_distal
GO:0048491	retrograde synaptic vesicle transport	8	9	85.996	0	68h	GO:0048491_68h	ATAC_cat_distal
GO:0048490	anterograde synaptic vesicle transport	8	9	85.996	0	68h	GO:0048490_68h	ATAC_cat_distal
GO:0007494	midgut development	51	1168	0.485	0	68h	GO:0007494_68h	ATAC_cat_distal
GO:0045333	cellular respiration	7	7	Inf	0	68h	GO:0045333_68h	ATAC_cat_distal
GO:0035316	non-sensory hair organization	9	12	32.254	0	68h	GO:0035316_68h	ATAC_cat_distal
GO:0045944	positive regulation of transcription from RNA polymerase II promoter	234	3765	0.697	0	68h	GO:0045944_68h	ATAC_cat_distal
GO:0007525	somatic muscle development	31	829	0.413	0	68h	GO:0007525_68h	ATAC_cat_distal
GO:0007517	muscle organ development	63	1323	0.531	0	68h	GO:0007517_68h	ATAC_cat_distal
GO:0018401	peptidyl-proline hydroxylation to 4-hydroxy-L-proline	17	47	6.099	0	68h	GO:0018401_68h	ATAC_cat_distal
GO:0009913	epidermal cell differentiation	16	42	6.622	0	68h	GO:0009913_68h	ATAC_cat_distal
GO:0006355	regulation of transcription, DNA-dependent	430	6279	0.77	0	68h	GO:0006355_68h	ATAC_cat_distal
GO:0007422	peripheral nervous system development	140	2413	0.652	0	68h	GO:0007422_68h	ATAC_cat_distal
GO:0018992	germ-line sex determination	8	11	28.664	0	68h	GO:0018992_68h	ATAC_cat_distal
GO:0038056	negative regulation of BMP signaling pathway by negative regulation of BMP secretion	6	6	Inf	0	68h	GO:0038056_68h	ATAC_cat_distal
GO:0007286	spermatid development	61	366	2.16	0	68h	GO:0007286_68h	ATAC_cat_distal
GO:0007417	central nervous system development	99	1814	0.612	1e-06	68h	GO:0007417_68h	ATAC_cat_distal
GO:0009187	cyclic nucleotide metabolic process	10	19	11.947	1e-06	68h	GO:0009187_68h	ATAC_cat_distal
GO:0003383	apical constriction	27	116	3.268	1e-06	68h	GO:0003383_68h	ATAC_cat_distal
GO:0007367	segment polarity determination	30	748	0.445	1e-06	68h	GO:0007367_68h	ATAC_cat_distal
GO:0007423	sensory organ development	58	1186	0.547	2e-06	68h	GO:0007423_68h	ATAC_cat_distal
GO:0014019	neuroblast development	20	574	0.385	2e-06	68h	GO:0014019_68h	ATAC_cat_distal
GO:0019933	cAMP-mediated signaling	16	50	5.063	2e-06	68h	GO:0019933_68h	ATAC_cat_distal
GO:0034314	Arp2/3 complex-mediated actin nucleation	8	13	17.198	2e-06	68h	GO:0034314_68h	ATAC_cat_distal
GO:0035199	salt aversion	6	7	64.472	2e-06	68h	GO:0035199_68h	ATAC_cat_distal
GO:0010529	negative regulation of transposition	6	7	64.472	2e-06	68h	GO:0010529_68h	ATAC_cat_distal
GO:0016441	posttranscriptional gene silencing	6	7	64.472	2e-06	68h	GO:0016441_68h	ATAC_cat_distal
GO:0000335	negative regulation of transposition, DNA-mediated	6	7	64.472	2e-06	68h	GO:0000335_68h	ATAC_cat_distal
GO:0060213	positive regulation of nuclear-transcribed mRNA poly(A) tail shortening	6	7	64.472	2e-06	68h	GO:0060213_68h	ATAC_cat_distal
GO:0006457	protein folding	30	142	2.886	3e-06	68h	GO:0006457_68h	ATAC_cat_distal
GO:0007501	mesodermal cell fate specification	10	383	0.286	3e-06	68h	GO:0007501_68h	ATAC_cat_distal
GO:0016482	cytoplasmic transport	5	5	Inf	4e-06	68h	GO:0016482_68h	ATAC_cat_distal
GO:0007427	epithelial cell migration, open tracheal system	55	1111	0.554	5e-06	68h	GO:0007427_68h	ATAC_cat_distal
GO:0000902	cell morphogenesis	14	447	0.345	6e-06	68h	GO:0000902_68h	ATAC_cat_distal
GO:0042335	cuticle development	9	18	10.75	6e-06	68h	GO:0042335_68h	ATAC_cat_distal
GO:0046958	nonassociative learning	9	18	10.75	6e-06	68h	GO:0046958_68h	ATAC_cat_distal
GO:0000003	reproduction	9	18	10.75	6e-06	68h	GO:0000003_68h	ATAC_cat_distal
GO:0016246	RNA interference	40	222	2.37	6e-06	68h	GO:0016246_68h	ATAC_cat_distal
GO:0007419	ventral cord development	45	952	0.528	8e-06	68h	GO:0007419_68h	ATAC_cat_distal
GO:0007411	axon guidance	226	3465	0.737	8e-06	68h	GO:0007411_68h	ATAC_cat_distal
GO:0006336	DNA replication-independent nucleosome assembly	6	8	32.235	9e-06	68h	GO:0006336_68h	ATAC_cat_distal
GO:0050914	sensory perception of salty taste	6	8	32.235	9e-06	68h	GO:0050914_68h	ATAC_cat_distal
GO:0006999	nuclear pore organization	6	8	32.235	9e-06	68h	GO:0006999_68h	ATAC_cat_distal
GO:0007384	specification of segmental identity, thorax	10	361	0.304	1.1e-05	68h	GO:0007384_68h	ATAC_cat_distal
GO:0048082	regulation of adult chitin-containing cuticle pigmentation	10	24	7.679	1.3e-05	68h	GO:0048082_68h	ATAC_cat_distal
GO:0033227	dsRNA transport	10	24	7.679	1.3e-05	68h	GO:0033227_68h	ATAC_cat_distal
GO:0035225	determination of genital disc primordium	21	554	0.42	1.6e-05	68h	GO:0035225_68h	ATAC_cat_distal
GO:0007479	leg disc proximal/distal pattern formation	38	819	0.519	2.2e-05	68h	GO:0007479_68h	ATAC_cat_distal
GO:0006584	catecholamine metabolic process	2	182	0.119	2.6e-05	68h	GO:0006584_68h	ATAC_cat_distal
GO:0001661	conditioned taste aversion	9	21	8.062	2.7e-05	68h	GO:0001661_68h	ATAC_cat_distal
GO:0007450	dorsal/ventral pattern formation, imaginal disc	9	332	0.298	2.7e-05	68h	GO:0007450_68h	ATAC_cat_distal
GO:0035050	embryonic heart tube development	25	608	0.458	2.8e-05	68h	GO:0035050_68h	ATAC_cat_distal
GO:0048067	cuticle pigmentation	8	17	9.554	3.3e-05	68h	GO:0048067_68h	ATAC_cat_distal
GO:0030206	chondroitin sulfate biosynthetic process	8	17	9.554	3.3e-05	68h	GO:0030206_68h	ATAC_cat_distal
GO:0010378	temperature compensation of the circadian clock	8	17	9.554	3.3e-05	68h	GO:0010378_68h	ATAC_cat_distal
GO:0010629	negative regulation of gene expression	31	689	0.503	4.8e-05	68h	GO:0010629_68h	ATAC_cat_distal
GO:0045471	response to ethanol	14	50	4.183	5.1e-05	68h	GO:0045471_68h	ATAC_cat_distal
GO:0051231	spindle elongation	4	4	Inf	5.3e-05	68h	GO:0051231_68h	ATAC_cat_distal
GO:0016052	carbohydrate catabolic process	3	195	0.167	5.3e-05	68h	GO:0016052_68h	ATAC_cat_distal
GO:0048542	lymph gland development	35	749	0.523	5.5e-05	68h	GO:0048542_68h	ATAC_cat_distal
GO:0050908	detection of light stimulus involved in visual perception	5	238	0.23	6.1e-05	68h	GO:0050908_68h	ATAC_cat_distal
GO:0046907	intracellular transport	9	23	6.91	6.4e-05	68h	GO:0046907_68h	ATAC_cat_distal
GO:0007432	salivary gland boundary specification	30	667	0.503	6.5e-05	68h	GO:0007432_68h	ATAC_cat_distal
GO:0007398	ectoderm development	42	848	0.556	7e-05	68h	GO:0007398_68h	ATAC_cat_distal
GO:0046662	regulation of oviposition	5	7	26.857	8.1e-05	68h	GO:0046662_68h	ATAC_cat_distal
GO:0031396	regulation of protein ubiquitination	5	7	26.857	8.1e-05	68h	GO:0031396_68h	ATAC_cat_distal
GO:0007032	endosome organization	5	7	26.857	8.1e-05	68h	GO:0007032_68h	ATAC_cat_distal
GO:0000046	autophagic vacuole fusion	5	7	26.857	8.1e-05	68h	GO:0000046_68h	ATAC_cat_distal
GO:0042384	cilium assembly	17	72	3.325	9.1e-05	68h	GO:0042384_68h	ATAC_cat_distal
GO:0010092	specification of organ identity	16	434	0.409	9.2e-05	68h	GO:0010092_68h	ATAC_cat_distal
GO:0035290	trunk segmentation	11	344	0.353	9.6e-05	68h	GO:0035290_68h	ATAC_cat_distal
GO:0007391	dorsal closure	114	1861	0.694	0.000102	68h	GO:0007391_68h	ATAC_cat_distal
GO:0007291	sperm individualization	52	351	1.875	0.000106	68h	GO:0007291_68h	ATAC_cat_distal
GO:0014018	neuroblast fate specification	2	164	0.132	0.000113	68h	GO:0014018_68h	ATAC_cat_distal
GO:0006965	positive regulation of biosynthetic process of antibacterial peptides active against Gram-positive bacteria	7	15	9.403	0.000113	68h	GO:0006965_68h	ATAC_cat_distal
GO:0002804	positive regulation of antifungal peptide production	7	15	9.403	0.000113	68h	GO:0002804_68h	ATAC_cat_distal
GO:0002781	antifungal peptide production	7	15	9.403	0.000113	68h	GO:0002781_68h	ATAC_cat_distal
GO:0007383	specification of segmental identity, antennal segment	20	496	0.449	0.000132	68h	GO:0007383_68h	ATAC_cat_distal
GO:0007448	anterior/posterior pattern specification, imaginal disc	6	245	0.269	0.000134	68h	GO:0007448_68h	ATAC_cat_distal
GO:0048260	positive regulation of receptor-mediated endocytosis	9	25	6.046	0.000136	68h	GO:0048260_68h	ATAC_cat_distal
GO:2000179	positive regulation of neural precursor cell proliferation	9	25	6.046	0.000136	68h	GO:2000179_68h	ATAC_cat_distal
GO:0007155	cell adhesion	100	1655	0.684	0.000145	68h	GO:0007155_68h	ATAC_cat_distal
GO:0035263	genital disc sexually dimorphic development	5	225	0.243	0.000167	68h	GO:0035263_68h	ATAC_cat_distal
GO:0007385	specification of segmental identity, abdomen	9	303	0.327	0.000171	68h	GO:0007385_68h	ATAC_cat_distal
GO:0008045	motor neuron axon guidance	57	1049	0.612	0.000177	68h	GO:0008045_68h	ATAC_cat_distal
GO:0042773	ATP synthesis coupled electron transport	7	16	8.358	0.000186	68h	GO:0042773_68h	ATAC_cat_distal
GO:0007438	oenocyte development	4	199	0.22	0.000194	68h	GO:0007438_68h	ATAC_cat_distal
GO:0007217	tachykinin receptor signaling pathway	5	8	17.905	0.000202	68h	GO:0007217_68h	ATAC_cat_distal
GO:0051642	centrosome localization	5	8	17.905	0.000202	68h	GO:0051642_68h	ATAC_cat_distal
GO:0009948	anterior/posterior axis specification	9	295	0.337	0.000223	68h	GO:0009948_68h	ATAC_cat_distal
GO:0001934	positive regulation of protein phosphorylation	6	12	10.744	0.000225	68h	GO:0001934_68h	ATAC_cat_distal
GO:0035224	genital disc anterior/posterior pattern formation	13	368	0.391	0.000228	68h	GO:0035224_68h	ATAC_cat_distal
GO:0042248	maintenance of polarity of follicular epithelium	4	5	42.964	0.000246	68h	GO:0042248_68h	ATAC_cat_distal
GO:0006505	GPI anchor metabolic process	4	5	42.964	0.000246	68h	GO:0006505_68h	ATAC_cat_distal
GO:0015798	myo-inositol transport	4	5	42.964	0.000246	68h	GO:0015798_68h	ATAC_cat_distal
GO:0035282	segmentation	21	497	0.471	0.000259	68h	GO:0035282_68h	ATAC_cat_distal
GO:0009593	detection of chemical stimulus	9	27	5.374	0.000266	68h	GO:0009593_68h	ATAC_cat_distal
GO:0008354	germ cell migration	24	544	0.493	0.000266	68h	GO:0008354_68h	ATAC_cat_distal
GO:0007415	defasciculation of motor neuron axon	12	45	3.91	0.000288	68h	GO:0007415_68h	ATAC_cat_distal
GO:0045664	regulation of neuron differentiation	14	380	0.409	0.00029	68h	GO:0045664_68h	ATAC_cat_distal
GO:0048639	positive regulation of developmental growth	7	17	7.522	0.000293	68h	GO:0048639_68h	ATAC_cat_distal
GO:0007526	larval somatic muscle development	12	342	0.389	0.0003	68h	GO:0007526_68h	ATAC_cat_distal
GO:0007131	reciprocal meiotic recombination	11	39	4.223	0.000301	68h	GO:0007131_68h	ATAC_cat_distal
GO:0016055	Wnt receptor signaling pathway	64	1132	0.639	0.000306	68h	GO:0016055_68h	ATAC_cat_distal
GO:0048813	dendrite morphogenesis	136	2119	0.729	0.000307	68h	GO:0048813_68h	ATAC_cat_distal
GO:0016319	mushroom body development	67	1174	0.645	0.000319	68h	GO:0016319_68h	ATAC_cat_distal
GO:0035215	genital disc development	21	492	0.476	0.000331	68h	GO:0035215_68h	ATAC_cat_distal
GO:0042752	regulation of circadian rhythm	24	130	2.437	0.00037	68h	GO:0042752_68h	ATAC_cat_distal
GO:0000122	negative regulation of transcription from RNA polymerase II promoter	233	3381	0.785	0.00038	68h	GO:0000122_68h	ATAC_cat_distal
GO:0007184	SMAD protein import into nucleus	6	13	9.209	0.000387	68h	GO:0007184_68h	ATAC_cat_distal
GO:0070868	heterochromatin organization involved in chromatin silencing	6	13	9.209	0.000387	68h	GO:0070868_68h	ATAC_cat_distal
GO:0034501	protein localization to kinetochore	5	9	13.428	0.000422	68h	GO:0034501_68h	ATAC_cat_distal
GO:0001737	establishment of imaginal disc-derived wing hair orientation	17	422	0.449	0.000426	68h	GO:0001737_68h	ATAC_cat_distal
GO:0007380	specification of segmental identity, head	15	384	0.435	0.000467	68h	GO:0007380_68h	ATAC_cat_distal
GO:0031290	retinal ganglion cell axon guidance	15	385	0.433	0.000467	68h	GO:0031290_68h	ATAC_cat_distal
GO:0001708	cell fate specification	18	432	0.465	0.000511	68h	GO:0001708_68h	ATAC_cat_distal
GO:0001745	compound eye morphogenesis	143	2191	0.742	0.000514	68h	GO:0001745_68h	ATAC_cat_distal
GO:0007523	larval visceral muscle development	27	576	0.525	0.000527	68h	GO:0007523_68h	ATAC_cat_distal
GO:0030177	positive regulation of Wnt receptor signaling pathway	10	298	0.371	0.000541	68h	GO:0030177_68h	ATAC_cat_distal
GO:0007280	pole cell migration	29	605	0.538	0.00055	68h	GO:0007280_68h	ATAC_cat_distal
GO:0019099	female germ-line sex determination	8	24	5.373	0.000585	68h	GO:0019099_68h	ATAC_cat_distal
GO:0043063	intercellular bridge organization	8	24	5.373	0.000585	68h	GO:0043063_68h	ATAC_cat_distal
GO:0042771	intrinsic apoptotic signaling pathway in response to DNA damage by p53 class mediator	13	55	3.328	0.000587	68h	GO:0042771_68h	ATAC_cat_distal
GO:0007186	G-protein coupled receptor signaling pathway	40	269	1.882	0.0006	68h	GO:0007186_68h	ATAC_cat_distal
GO:0007224	smoothened signaling pathway	28	588	0.534	0.000602	68h	GO:0007224_68h	ATAC_cat_distal
GO:0007613	memory	20	105	2.531	0.000603	68h	GO:0007613_68h	ATAC_cat_distal
GO:0043950	positive regulation of cAMP-mediated signaling	10	36	4.134	0.000642	68h	GO:0043950_68h	ATAC_cat_distal
GO:0009649	entrainment of circadian clock	20	106	2.502	0.000666	68h	GO:0009649_68h	ATAC_cat_distal
GO:0035277	spiracle morphogenesis, open tracheal system	38	735	0.582	0.000668	68h	GO:0035277_68h	ATAC_cat_distal
GO:0045859	regulation of protein kinase activity	4	6	21.482	0.000687	68h	GO:0045859_68h	ATAC_cat_distal
GO:0016926	protein desumoylation	4	6	21.482	0.000687	68h	GO:0016926_68h	ATAC_cat_distal
GO:0006886	intracellular protein transport	28	169	2.138	0.000739	68h	GO:0006886_68h	ATAC_cat_distal
GO:0007475	apposition of dorsal and ventral imaginal disc-derived wing surfaces	25	536	0.523	0.000784	68h	GO:0007475_68h	ATAC_cat_distal
GO:0019896	axon transport of mitochondrion	8	25	5.057	0.000796	68h	GO:0019896_68h	ATAC_cat_distal
GO:0016476	regulation of embryonic cell shape	35	230	1.933	0.000803	68h	GO:0016476_68h	ATAC_cat_distal
GO:0006338	chromatin remodeling	35	231	1.923	0.000839	68h	GO:0006338_68h	ATAC_cat_distal
GO:0007420	brain development	87	1416	0.697	0.000872	68h	GO:0007420_68h	ATAC_cat_distal
GO:0042067	establishment of ommatidial planar polarity	37	712	0.585	0.0009	68h	GO:0042067_68h	ATAC_cat_distal
GO:0007521	muscle cell fate determination	3	160	0.205	0.000905	68h	GO:0007521_68h	ATAC_cat_distal
GO:0051781	positive regulation of cell division	7	20	5.786	0.00093	68h	GO:0051781_68h	ATAC_cat_distal
GO:0007041	lysosomal transport	6	15	7.162	0.000972	68h	GO:0007041_68h	ATAC_cat_distal
GO:0007483	genital disc morphogenesis	2	134	0.162	0.000985	68h	GO:0007483_68h	ATAC_cat_distal
GO:0007606	sensory perception of chemical stimulus	40	274	1.841	0.001007	68h	GO:0007606_68h	ATAC_cat_distal
GO:0008062	eclosion rhythm	15	73	2.781	0.001112	68h	GO:0008062_68h	ATAC_cat_distal
GO:0048675	axon extension	86	712	1.483	0.001145	68h	GO:0048675_68h	ATAC_cat_distal
GO:0008101	decapentaplegic signaling pathway	17	402	0.472	0.001165	68h	GO:0008101_68h	ATAC_cat_distal
GO:0010212	response to ionizing radiation	13	59	3.038	0.001188	68h	GO:0010212_68h	ATAC_cat_distal
GO:0061327	anterior Malpighian tubule development	16	382	0.468	0.001231	68h	GO:0061327_68h	ATAC_cat_distal
GO:0050768	negative regulation of neurogenesis	7	231	0.334	0.001279	68h	GO:0050768_68h	ATAC_cat_distal
GO:0035157	negative regulation of fusion cell fate specification	7	231	0.334	0.001279	68h	GO:0035157_68h	ATAC_cat_distal
GO:0008584	male gonad development	8	247	0.358	0.001284	68h	GO:0008584_68h	ATAC_cat_distal
GO:0007265	Ras protein signal transduction	21	458	0.514	0.001367	68h	GO:0007265_68h	ATAC_cat_distal
GO:0007442	hindgut morphogenesis	21	461	0.51	0.00138	68h	GO:0007442_68h	ATAC_cat_distal
GO:0008347	glial cell migration	51	901	0.64	0.001402	68h	GO:0008347_68h	ATAC_cat_distal
GO:0030317	sperm motility	12	53	3.146	0.001411	68h	GO:0030317_68h	ATAC_cat_distal
GO:0048665	neuron fate specification	4	170	0.258	0.001438	68h	GO:0048665_68h	ATAC_cat_distal
GO:0007522	visceral muscle development	1	107	0.101	0.001455	68h	GO:0007522_68h	ATAC_cat_distal
GO:0007498	mesoderm development	70	1167	0.681	0.001456	68h	GO:0007498_68h	ATAC_cat_distal
GO:2000242	negative regulation of reproductive process	4	7	14.321	0.001494	68h	GO:2000242_68h	ATAC_cat_distal
GO:0008544	epidermis development	17	398	0.477	0.001505	68h	GO:0008544_68h	ATAC_cat_distal
GO:0007400	neuroblast fate determination	45	814	0.625	0.001527	68h	GO:0007400_68h	ATAC_cat_distal
GO:0008592	regulation of Toll signaling pathway	10	40	3.583	0.001563	68h	GO:0008592_68h	ATAC_cat_distal
GO:0051297	centrosome organization	21	121	2.259	0.001593	68h	GO:0051297_68h	ATAC_cat_distal
GO:0007164	establishment of tissue polarity	7	225	0.344	0.001712	68h	GO:0007164_68h	ATAC_cat_distal
GO:0040020	regulation of meiosis	9	34	3.869	0.001726	68h	GO:0040020_68h	ATAC_cat_distal
GO:0042386	hemocyte differentiation	9	34	3.869	0.001726	68h	GO:0042386_68h	ATAC_cat_distal
GO:0048636	positive regulation of muscle organ development	8	245	0.361	0.001759	68h	GO:0048636_68h	ATAC_cat_distal
GO:0046843	dorsal appendage formation	45	806	0.631	0.001821	68h	GO:0046843_68h	ATAC_cat_distal
GO:0008343	adult feeding behavior	14	69	2.737	0.001821	68h	GO:0008343_68h	ATAC_cat_distal
GO:0009790	embryo development	50	877	0.645	0.001851	68h	GO:0009790_68h	ATAC_cat_distal
GO:0001752	compound eye photoreceptor fate commitment	17	389	0.489	0.001877	68h	GO:0001752_68h	ATAC_cat_distal
GO:0008306	associative learning	10	41	3.467	0.001911	68h	GO:0008306_68h	ATAC_cat_distal
GO:0007379	segment specification	31	601	0.581	0.001988	68h	GO:0007379_68h	ATAC_cat_distal
GO:0016318	ommatidial rotation	59	1002	0.668	0.002018	68h	GO:0016318_68h	ATAC_cat_distal
GO:0046534	positive regulation of photoreceptor cell differentiation	5	12	7.673	0.002132	68h	GO:0046534_68h	ATAC_cat_distal
GO:0007506	gonadal mesoderm development	11	292	0.419	0.002132	68h	GO:0007506_68h	ATAC_cat_distal
GO:0046847	filopodium assembly	5	184	0.299	0.002162	68h	GO:0046847_68h	ATAC_cat_distal
GO:0008587	imaginal disc-derived wing margin morphogenesis	50	870	0.651	0.002204	68h	GO:0008587_68h	ATAC_cat_distal
GO:0006396	RNA processing	3	4	32.217	0.002317	68h	GO:0006396_68h	ATAC_cat_distal
GO:0060250	germ-line stem-cell niche homeostasis	27	173	1.99	0.00232	68h	GO:0060250_68h	ATAC_cat_distal
GO:0045892	negative regulation of transcription, DNA-dependent	90	1420	0.721	0.002407	68h	GO:0045892_68h	ATAC_cat_distal
GO:0036011	imaginal disc-derived leg segmentation	13	321	0.452	0.00248	68h	GO:0036011_68h	ATAC_cat_distal
GO:0048730	epidermis morphogenesis	0	73	0	0.002604	68h	GO:0048730_68h	ATAC_cat_distal
GO:0035331	negative regulation of hippo signaling cascade	4	162	0.271	0.002774	68h	GO:0035331_68h	ATAC_cat_distal
GO:0007344	pronuclear fusion	4	8	10.74	0.002786	68h	GO:0007344_68h	ATAC_cat_distal
GO:0007220	Notch receptor processing	20	119	2.173	0.002848	68h	GO:0007220_68h	ATAC_cat_distal
GO:0032312	regulation of ARF GTPase activity	2	120	0.182	0.002879	68h	GO:0032312_68h	ATAC_cat_distal
GO:0006967	positive regulation of antifungal peptide biosynthetic process	2	123	0.177	0.002998	68h	GO:0006967_68h	ATAC_cat_distal
GO:0048644	muscle organ morphogenesis	8	234	0.379	0.003086	68h	GO:0048644_68h	ATAC_cat_distal
GO:2000274	regulation of epithelial cell migration, open tracheal system	7	217	0.357	0.00314	68h	GO:2000274_68h	ATAC_cat_distal
GO:0022409	positive regulation of cell-cell adhesion	7	217	0.357	0.00314	68h	GO:0022409_68h	ATAC_cat_distal
GO:0048666	neuron development	43	760	0.641	0.003221	68h	GO:0048666_68h	ATAC_cat_distal
GO:0042694	muscle cell fate specification	32	605	0.597	0.003305	68h	GO:0042694_68h	ATAC_cat_distal
GO:0060071	Wnt receptor signaling pathway, planar cell polarity pathway	3	138	0.238	0.003441	68h	GO:0060071_68h	ATAC_cat_distal
GO:0007418	ventral midline development	18	390	0.518	0.003533	68h	GO:0007418_68h	ATAC_cat_distal
GO:0007173	epidermal growth factor receptor signaling pathway	50	856	0.663	0.003693	68h	GO:0007173_68h	ATAC_cat_distal
GO:0001700	embryonic development via the syncytial blastoderm	74	1187	0.709	0.003818	68h	GO:0001700_68h	ATAC_cat_distal
GO:0007476	imaginal disc-derived wing morphogenesis	394	5274	0.855	0.003829	68h	GO:0007476_68h	ATAC_cat_distal
GO:0045931	positive regulation of mitotic cell cycle	0	69	0	0.003954	68h	GO:0045931_68h	ATAC_cat_distal
GO:0006955	immune response	51	402	1.565	0.00406	68h	GO:0006955_68h	ATAC_cat_distal
GO:0007414	axonal defasciculation	21	130	2.072	0.0041	68h	GO:0007414_68h	ATAC_cat_distal
GO:0042684	cardioblast cell fate commitment	2	116	0.188	0.004119	68h	GO:0042684_68h	ATAC_cat_distal
GO:0035223	leg disc pattern formation	2	116	0.188	0.004119	68h	GO:0035223_68h	ATAC_cat_distal
GO:0007460	R8 cell fate commitment	6	193	0.344	0.004151	68h	GO:0007460_68h	ATAC_cat_distal
GO:0045494	photoreceptor cell maintenance	20	120	2.151	0.004496	68h	GO:0045494_68h	ATAC_cat_distal
GO:0030010	establishment of cell polarity	11	275	0.446	0.004667	68h	GO:0030010_68h	ATAC_cat_distal
GO:0046845	branched duct epithelial cell fate determination, open tracheal system	11	275	0.446	0.004667	68h	GO:0046845_68h	ATAC_cat_distal
GO:0000070	mitotic sister chromatid segregation	1	95	0.114	0.00471	68h	GO:0000070_68h	ATAC_cat_distal
GO:0045927	positive regulation of growth	12	61	2.632	0.004884	68h	GO:0045927_68h	ATAC_cat_distal
GO:0045454	cell redox homeostasis	14	74	2.508	0.004962	68h	GO:0045454_68h	ATAC_cat_distal
GO:0007156	homophilic cell adhesion	64	1039	0.701	0.005007	68h	GO:0007156_68h	ATAC_cat_distal
GO:0008088	axon cargo transport	7	26	3.958	0.005013	68h	GO:0008088_68h	ATAC_cat_distal
GO:0060914	heart formation	3	137	0.24	0.005045	68h	GO:0060914_68h	ATAC_cat_distal
GO:0001764	neuron migration	9	239	0.419	0.005164	68h	GO:0001764_68h	ATAC_cat_distal
GO:0007430	terminal branching, open tracheal system	43	328	1.625	0.005189	68h	GO:0007430_68h	ATAC_cat_distal
GO:0010002	cardioblast differentiation	19	402	0.531	0.005211	68h	GO:0010002_68h	ATAC_cat_distal
GO:0097374	sensory neuron axon guidance	4	151	0.291	0.005259	68h	GO:0097374_68h	ATAC_cat_distal
GO:0007394	dorsal closure, elongation of leading edge cells	4	152	0.29	0.005274	68h	GO:0007394_68h	ATAC_cat_distal
GO:0000256	allantoin catabolic process	3	5	16.108	0.005424	68h	GO:0000256_68h	ATAC_cat_distal
GO:0045475	locomotor rhythm	60	491	1.5	0.005577	68h	GO:0045475_68h	ATAC_cat_distal
GO:0007051	spindle organization	12	62	2.58	0.005596	68h	GO:0007051_68h	ATAC_cat_distal
GO:0045880	positive regulation of smoothened signaling pathway	6	190	0.349	0.005712	68h	GO:0045880_68h	ATAC_cat_distal
GO:0030718	germ-line stem cell maintenance	34	619	0.621	0.005802	68h	GO:0030718_68h	ATAC_cat_distal
GO:0042685	cardioblast cell fate specification	2	113	0.193	0.006007	68h	GO:0042685_68h	ATAC_cat_distal
GO:0090254	cell elongation involved in imaginal disc-derived wing morphogenesis	0	65	0	0.00603	68h	GO:0090254_68h	ATAC_cat_distal
GO:0070588	calcium ion transmembrane transport	14	77	2.389	0.006257	68h	GO:0070588_68h	ATAC_cat_distal
GO:0019827	stem cell maintenance	19	115	2.128	0.006333	68h	GO:0019827_68h	ATAC_cat_distal
GO:0090175	regulation of establishment of planar polarity	10	251	0.444	0.00642	68h	GO:0090175_68h	ATAC_cat_distal
GO:0007617	mating behavior	13	67	2.588	0.006479	68h	GO:0007617_68h	ATAC_cat_distal
GO:0007485	imaginal disc-derived male genitalia development	10	254	0.439	0.006484	68h	GO:0007485_68h	ATAC_cat_distal
GO:0061353	BMP signaling pathway involved in Malpighian tubule cell chemotaxis	1	88	0.123	0.006551	68h	GO:0061353_68h	ATAC_cat_distal
GO:0030036	actin cytoskeleton organization	31	572	0.613	0.006568	68h	GO:0030036_68h	ATAC_cat_distal
GO:0042810	pheromone metabolic process	9	41	3.022	0.006706	68h	GO:0042810_68h	ATAC_cat_distal
GO:0048800	antennal morphogenesis	9	235	0.426	0.006784	68h	GO:0048800_68h	ATAC_cat_distal
GO:0001944	vasculature development	9	238	0.421	0.006952	68h	GO:0001944_68h	ATAC_cat_distal
GO:0007274	neuromuscular synaptic transmission	18	376	0.538	0.007021	68h	GO:0007274_68h	ATAC_cat_distal
GO:0007480	imaginal disc-derived leg morphogenesis	106	1584	0.765	0.00711	68h	GO:0007480_68h	ATAC_cat_distal
GO:0048268	clathrin coat assembly	2	2	Inf	0.007263	68h	GO:0048268_68h	ATAC_cat_distal
GO:0007633	pattern orientation	2	2	Inf	0.007263	68h	GO:0007633_68h	ATAC_cat_distal
GO:0046716	muscle cell homeostasis	15	330	0.51	0.007322	68h	GO:0046716_68h	ATAC_cat_distal
GO:0035217	labial disc development	4	149	0.296	0.007391	68h	GO:0035217_68h	ATAC_cat_distal
GO:0030707	ovarian follicle cell development	85	1302	0.745	0.00781	68h	GO:0030707_68h	ATAC_cat_distal
GO:0006952	defense response	77	674	1.39	0.008339	68h	GO:0006952_68h	ATAC_cat_distal
GO:0048735	haltere morphogenesis	10	250	0.446	0.008508	68h	GO:0048735_68h	ATAC_cat_distal
GO:0009954	proximal/distal pattern formation	10	250	0.446	0.008508	68h	GO:0009954_68h	ATAC_cat_distal
GO:0034504	protein localization to nucleus	10	250	0.446	0.008508	68h	GO:0034504_68h	ATAC_cat_distal
GO:0006479	protein methylation	0	60	0	0.009005	68h	GO:0006479_68h	ATAC_cat_distal
GO:0035317	imaginal disc-derived wing hair organization	15	323	0.521	0.009221	68h	GO:0035317_68h	ATAC_cat_distal
GO:0007451	dorsal/ventral lineage restriction, imaginal disc	12	276	0.487	0.00933	68h	GO:0007451_68h	ATAC_cat_distal
GO:0003015	heart process	8	214	0.416	0.00943	68h	GO:0003015_68h	ATAC_cat_distal
GO:0042066	perineurial glial growth	20	40	13.403	0	1012h	GO:0042066_1012h	ATAC_cat_distal
GO:0018401	peptidyl-proline hydroxylation to 4-hydroxy-L-proline	23	59	8.566	0	1012h	GO:0018401_1012h	ATAC_cat_distal
GO:0003383	apical constriction	33	131	4.52	0	1012h	GO:0003383_1012h	ATAC_cat_distal
GO:0045333	cellular respiration	7	7	Inf	0	1012h	GO:0045333_1012h	ATAC_cat_distal
GO:0010378	temperature compensation of the circadian clock	11	26	9.812	1e-06	1012h	GO:0010378_1012h	ATAC_cat_distal
GO:0007286	spermatid development	60	440	2.122	1e-06	1012h	GO:0007286_1012h	ATAC_cat_distal
GO:0016476	regulation of embryonic cell shape	43	277	2.466	1e-06	1012h	GO:0016476_1012h	ATAC_cat_distal
GO:0046294	formaldehyde catabolic process	5	5	Inf	2e-06	1012h	GO:0046294_1012h	ATAC_cat_distal
GO:0001934	positive regulation of protein phosphorylation	8	15	15.284	2e-06	1012h	GO:0001934_1012h	ATAC_cat_distal
GO:0006355	regulation of transcription, DNA-dependent	380	6749	0.78	4e-06	1012h	GO:0006355_1012h	ATAC_cat_distal
GO:0007525	somatic muscle development	30	894	0.46	4e-06	1012h	GO:0007525_1012h	ATAC_cat_distal
GO:0031396	regulation of protein ubiquitination	5	6	66.835	9e-06	1012h	GO:0031396_1012h	ATAC_cat_distal
GO:0007032	endosome organization	5	6	66.835	9e-06	1012h	GO:0007032_1012h	ATAC_cat_distal
GO:0000046	autophagic vacuole fusion	5	6	66.835	9e-06	1012h	GO:0000046_1012h	ATAC_cat_distal
GO:0038056	negative regulation of BMP signaling pathway by negative regulation of BMP secretion	5	6	66.835	9e-06	1012h	GO:0038056_1012h	ATAC_cat_distal
GO:0007530	sex determination	27	156	2.805	1.1e-05	1012h	GO:0007530_1012h	ATAC_cat_distal
GO:0045475	locomotor rhythm	70	591	1.805	1.5e-05	1012h	GO:0045475_1012h	ATAC_cat_distal
GO:0007494	midgut development	49	1221	0.554	1.5e-05	1012h	GO:0007494_1012h	ATAC_cat_distal
GO:0006336	DNA replication-independent nucleosome assembly	7	14	13.371	1.8e-05	1012h	GO:0006336_1012h	ATAC_cat_distal
GO:0033540	fatty acid beta-oxidation using acyl-CoA oxidase	6	10	20.054	1.9e-05	1012h	GO:0033540_1012h	ATAC_cat_distal
GO:0007526	larval somatic muscle development	7	368	0.258	1.9e-05	1012h	GO:0007526_1012h	ATAC_cat_distal
GO:0016482	cytoplasmic transport	4	4	Inf	2.4e-05	1012h	GO:0016482_1012h	ATAC_cat_distal
GO:0007438	oenocyte development	1	196	0.068	2.7e-05	1012h	GO:0007438_1012h	ATAC_cat_distal
GO:0007385	specification of segmental identity, abdomen	4	279	0.194	2.9e-05	1012h	GO:0007385_1012h	ATAC_cat_distal
GO:0006357	regulation of transcription from RNA polymerase II promoter	113	2315	0.678	3.2e-05	1012h	GO:0006357_1012h	ATAC_cat_distal
GO:0042386	hemocyte differentiation	11	38	5.45	3.8e-05	1012h	GO:0042386_1012h	ATAC_cat_distal
GO:0002118	aggressive behavior	11	39	5.256	5e-05	1012h	GO:0002118_1012h	ATAC_cat_distal
GO:0042659	regulation of cell fate specification	24	711	0.464	5.7e-05	1012h	GO:0042659_1012h	ATAC_cat_distal
GO:0048636	positive regulation of muscle organ development	3	238	0.17	6.1e-05	1012h	GO:0048636_1012h	ATAC_cat_distal
GO:0010092	specification of organ identity	11	435	0.345	6.2e-05	1012h	GO:0010092_1012h	ATAC_cat_distal
GO:0007427	epithelial cell migration, open tracheal system	51	1214	0.581	6.5e-05	1012h	GO:0007427_1012h	ATAC_cat_distal
GO:0032006	regulation of TOR signaling cascade	8	22	7.641	7.3e-05	1012h	GO:0032006_1012h	ATAC_cat_distal
GO:0040009	regulation of growth rate	8	22	7.641	7.3e-05	1012h	GO:0040009_1012h	ATAC_cat_distal
GO:0014059	regulation of dopamine secretion	6	12	13.369	7.3e-05	1012h	GO:0014059_1012h	ATAC_cat_distal
GO:0007262	STAT protein import into nucleus	5	8	22.278	7.7e-05	1012h	GO:0007262_1012h	ATAC_cat_distal
GO:0006968	cellular defense response	5	8	22.278	7.7e-05	1012h	GO:0006968_1012h	ATAC_cat_distal
GO:0006999	nuclear pore organization	5	8	22.278	7.7e-05	1012h	GO:0006999_1012h	ATAC_cat_distal
GO:0007260	tyrosine phosphorylation of STAT protein	5	8	22.278	7.7e-05	1012h	GO:0007260_1012h	ATAC_cat_distal
GO:0007291	sperm individualization	49	395	1.9	9.4e-05	1012h	GO:0007291_1012h	ATAC_cat_distal
GO:0016543	male courtship behavior, orientation prior to leg tapping and wing vibration	11	42	4.747	0.000105	1012h	GO:0016543_1012h	ATAC_cat_distal
GO:0016545	male courtship behavior, veined wing vibration	11	42	4.747	0.000105	1012h	GO:0016545_1012h	ATAC_cat_distal
GO:0006505	GPI anchor metabolic process	4	5	53.458	0.000111	1012h	GO:0006505_1012h	ATAC_cat_distal
GO:0015798	myo-inositol transport	4	5	53.458	0.000111	1012h	GO:0015798_1012h	ATAC_cat_distal
GO:0046661	male sex differentiation	15	72	3.522	0.000111	1012h	GO:0046661_1012h	ATAC_cat_distal
GO:0000076	DNA replication checkpoint	9	30	5.732	0.000143	1012h	GO:0000076_1012h	ATAC_cat_distal
GO:0009996	negative regulation of cell fate specification	14	482	0.398	0.000144	1012h	GO:0009996_1012h	ATAC_cat_distal
GO:0006457	protein folding	24	152	2.511	0.000159	1012h	GO:0006457_1012h	ATAC_cat_distal
GO:0035282	segmentation	17	543	0.43	0.000175	1012h	GO:0035282_1012h	ATAC_cat_distal
GO:0035332	positive regulation of hippo signaling cascade	15	75	3.345	0.00018	1012h	GO:0035332_1012h	ATAC_cat_distal
GO:0006584	catecholamine metabolic process	3	225	0.18	0.000181	1012h	GO:0006584_1012h	ATAC_cat_distal
GO:0016052	carbohydrate catabolic process	3	225	0.18	0.000181	1012h	GO:0016052_1012h	ATAC_cat_distal
GO:0007507	heart development	108	2158	0.697	0.000183	1012h	GO:0007507_1012h	ATAC_cat_distal
GO:0034314	Arp2/3 complex-mediated actin nucleation	7	19	7.799	0.000189	1012h	GO:0034314_1012h	ATAC_cat_distal
GO:0042051	compound eye photoreceptor development	32	829	0.533	0.000197	1012h	GO:0042051_1012h	ATAC_cat_distal
GO:0006904	vesicle docking involved in exocytosis	8	25	6.293	0.000203	1012h	GO:0006904_1012h	ATAC_cat_distal
GO:0007618	mating	11	45	4.328	0.000205	1012h	GO:0007618_1012h	ATAC_cat_distal
GO:0035277	spiracle morphogenesis, open tracheal system	26	716	0.501	0.000207	1012h	GO:0035277_1012h	ATAC_cat_distal
GO:0035149	lumen formation, open tracheal system	9	360	0.341	0.00025	1012h	GO:0035149_1012h	ATAC_cat_distal
GO:0045927	positive regulation of growth	13	62	3.549	0.000293	1012h	GO:0045927_1012h	ATAC_cat_distal
GO:0045433	male courtship behavior, veined wing generated song production	18	104	2.801	0.000294	1012h	GO:0045433_1012h	ATAC_cat_distal
GO:0006886	intracellular protein transport	29	207	2.182	0.000309	1012h	GO:0006886_1012h	ATAC_cat_distal
GO:0050908	detection of light stimulus involved in visual perception	4	241	0.225	0.000311	1012h	GO:0050908_1012h	ATAC_cat_distal
GO:0016255	attachment of GPI anchor to protein	4	6	26.728	0.000315	1012h	GO:0016255_1012h	ATAC_cat_distal
GO:0008360	regulation of cell shape	68	1455	0.65	0.000321	1012h	GO:0008360_1012h	ATAC_cat_distal
GO:0007275	multicellular organismal development	29	208	2.17	0.000329	1012h	GO:0007275_1012h	ATAC_cat_distal
GO:0032922	circadian regulation of gene expression	13	63	3.478	0.000346	1012h	GO:0032922_1012h	ATAC_cat_distal
GO:0007623	circadian rhythm	70	651	1.617	0.000348	1012h	GO:0007623_1012h	ATAC_cat_distal
GO:0042461	photoreceptor cell development	22	141	2.475	0.00035	1012h	GO:0042461_1012h	ATAC_cat_distal
GO:0042384	cilium assembly	17	97	2.844	0.000367	1012h	GO:0042384_1012h	ATAC_cat_distal
GO:0042773	ATP synthesis coupled electron transport	8	27	5.63	0.000368	1012h	GO:0042773_1012h	ATAC_cat_distal
GO:0045880	positive regulation of smoothened signaling pathway	2	181	0.149	0.000372	1012h	GO:0045880_1012h	ATAC_cat_distal
GO:0045467	R7 cell development	24	659	0.502	0.000378	1012h	GO:0045467_1012h	ATAC_cat_distal
GO:0007367	segment polarity determination	26	693	0.518	0.000403	1012h	GO:0007367_1012h	ATAC_cat_distal
GO:0007605	sensory perception of sound	12	414	0.397	0.000445	1012h	GO:0007605_1012h	ATAC_cat_distal
GO:0007501	mesodermal cell fate specification	9	350	0.351	0.000453	1012h	GO:0007501_1012h	ATAC_cat_distal
GO:0007637	proboscis extension reflex	8	28	5.349	0.000484	1012h	GO:0007637_1012h	ATAC_cat_distal
GO:0060031	mediolateral intercalation	6	16	8.021	0.000496	1012h	GO:0060031_1012h	ATAC_cat_distal
GO:0071044	histone mRNA catabolic process	6	16	8.021	0.000496	1012h	GO:0071044_1012h	ATAC_cat_distal
GO:0060071	Wnt receptor signaling pathway, planar cell polarity pathway	1	146	0.092	0.000512	1012h	GO:0060071_1012h	ATAC_cat_distal
GO:0048047	mating behavior, sex discrimination	13	66	3.281	0.000555	1012h	GO:0048047_1012h	ATAC_cat_distal
GO:0007617	mating behavior	20	126	2.526	0.000567	1012h	GO:0007617_1012h	ATAC_cat_distal
GO:0007368	determination of left/right symmetry	12	59	3.415	0.000662	1012h	GO:0007368_1012h	ATAC_cat_distal
GO:0051642	centrosome localization	4	7	17.819	0.000694	1012h	GO:0051642_1012h	ATAC_cat_distal
GO:0042246	tissue regeneration	7	294	0.325	0.000771	1012h	GO:0042246_1012h	ATAC_cat_distal
GO:0007030	Golgi organization	26	188	2.149	0.000795	1012h	GO:0007030_1012h	ATAC_cat_distal
GO:0008088	axon cargo transport	8	30	4.862	0.000804	1012h	GO:0008088_1012h	ATAC_cat_distal
GO:0007184	SMAD protein import into nucleus	5	12	9.547	0.000856	1012h	GO:0007184_1012h	ATAC_cat_distal
GO:0001706	endoderm formation	3	194	0.209	0.000978	1012h	GO:0001706_1012h	ATAC_cat_distal
GO:0008406	gonad development	62	1305	0.662	0.000981	1012h	GO:0008406_1012h	ATAC_cat_distal
GO:0050802	circadian sleep/wake cycle, sleep	6	18	6.684	0.001018	1012h	GO:0050802_1012h	ATAC_cat_distal
GO:0030206	chondroitin sulfate biosynthetic process	6	18	6.684	0.001018	1012h	GO:0030206_1012h	ATAC_cat_distal
GO:0006813	potassium ion transport	22	151	2.283	0.001038	1012h	GO:0006813_1012h	ATAC_cat_distal
GO:0035171	lamellocyte differentiation	16	97	2.643	0.001066	1012h	GO:0035171_1012h	ATAC_cat_distal
GO:0008345	larval locomotory behavior	30	232	1.989	0.00107	1012h	GO:0008345_1012h	ATAC_cat_distal
GO:0007432	salivary gland boundary specification	27	682	0.548	0.001115	1012h	GO:0007432_1012h	ATAC_cat_distal
GO:0007424	open tracheal system development	141	2609	0.756	0.001137	1012h	GO:0007424_1012h	ATAC_cat_distal
GO:0007422	peripheral nervous system development	138	2559	0.754	0.001174	1012h	GO:0007422_1012h	ATAC_cat_distal
GO:0006468	protein phosphorylation	198	2271	1.287	0.001244	1012h	GO:0006468_1012h	ATAC_cat_distal
GO:0031536	positive regulation of exit from mitosis	10	47	3.614	0.001269	1012h	GO:0031536_1012h	ATAC_cat_distal
GO:0016441	posttranscriptional gene silencing	4	8	13.364	0.001311	1012h	GO:0016441_1012h	ATAC_cat_distal
GO:0000335	negative regulation of transposition, DNA-mediated	4	8	13.364	0.001311	1012h	GO:0000335_1012h	ATAC_cat_distal
GO:0042690	negative regulation of crystal cell differentiation	3	186	0.218	0.001359	1012h	GO:0042690_1012h	ATAC_cat_distal
GO:0007393	dorsal closure, leading edge cell fate determination	4	208	0.261	0.001572	1012h	GO:0007393_1012h	ATAC_cat_distal
GO:0008049	male courtship behavior	39	335	1.765	0.001674	1012h	GO:0008049_1012h	ATAC_cat_distal
GO:0045944	positive regulation of transcription from RNA polymerase II promoter	213	3730	0.8	0.001695	1012h	GO:0045944_1012h	ATAC_cat_distal
GO:0031290	retinal ganglion cell axon guidance	16	464	0.475	0.001747	1012h	GO:0031290_1012h	ATAC_cat_distal
GO:0016192	vesicle-mediated transport	41	359	1.728	0.00175	1012h	GO:0016192_1012h	ATAC_cat_distal
GO:0048058	compound eye corneal lens development	3	183	0.222	0.001936	1012h	GO:0048058_1012h	ATAC_cat_distal
GO:0032008	positive regulation of TOR signaling cascade	8	34	4.114	0.001943	1012h	GO:0032008_1012h	ATAC_cat_distal
GO:0007131	reciprocal meiotic recombination	8	34	4.114	0.001943	1012h	GO:0007131_1012h	ATAC_cat_distal
GO:0001558	regulation of cell growth	20	138	2.268	0.001991	1012h	GO:0001558_1012h	ATAC_cat_distal
GO:0007379	segment specification	27	665	0.563	0.00212	1012h	GO:0007379_1012h	ATAC_cat_distal
GO:0048488	synaptic vesicle endocytosis	4	203	0.268	0.002172	1012h	GO:0048488_1012h	ATAC_cat_distal
GO:0007479	leg disc proximal/distal pattern formation	35	810	0.6	0.002179	1012h	GO:0007479_1012h	ATAC_cat_distal
GO:0061327	anterior Malpighian tubule development	12	378	0.436	0.002209	1012h	GO:0061327_1012h	ATAC_cat_distal
GO:0060213	positive regulation of nuclear-transcribed mRNA poly(A) tail shortening	4	9	10.691	0.002229	1012h	GO:0060213_1012h	ATAC_cat_distal
GO:0000070	mitotic sister chromatid segregation	1	126	0.107	0.002338	1012h	GO:0000070_1012h	ATAC_cat_distal
GO:0072499	photoreceptor cell axon guidance	5	226	0.301	0.002361	1012h	GO:0072499_1012h	ATAC_cat_distal
GO:0008101	decapentaplegic signaling pathway	15	434	0.477	0.002361	1012h	GO:0008101_1012h	ATAC_cat_distal
GO:0070328	triglyceride homeostasis	10	51	3.262	0.002429	1012h	GO:0070328_1012h	ATAC_cat_distal
GO:0048072	compound eye pigmentation	6	21	5.347	0.002482	1012h	GO:0048072_1012h	ATAC_cat_distal
GO:0035224	genital disc anterior/posterior pattern formation	9	316	0.39	0.002533	1012h	GO:0035224_1012h	ATAC_cat_distal
GO:0016579	protein deubiquitination	12	69	2.816	0.002734	1012h	GO:0016579_1012h	ATAC_cat_distal
GO:0035186	syncytial blastoderm mitotic cell cycle	4	196	0.278	0.002992	1012h	GO:0035186_1012h	ATAC_cat_distal
GO:0009253	peptidoglycan catabolic process	7	29	4.254	0.003161	1012h	GO:0009253_1012h	ATAC_cat_distal
GO:0048639	positive regulation of developmental growth	6	22	5.013	0.003214	1012h	GO:0048639_1012h	ATAC_cat_distal
GO:0046665	amnioserosa maintenance	6	245	0.334	0.00343	1012h	GO:0046665_1012h	ATAC_cat_distal
GO:0019827	stem cell maintenance	21	153	2.129	0.003472	1012h	GO:0019827_1012h	ATAC_cat_distal
GO:0010529	negative regulation of transposition	4	10	8.909	0.003511	1012h	GO:0010529_1012h	ATAC_cat_distal
GO:0006338	chromatin remodeling	28	227	1.884	0.003604	1012h	GO:0006338_1012h	ATAC_cat_distal
GO:0007435	salivary gland morphogenesis	78	1520	0.718	0.003665	1012h	GO:0007435_1012h	ATAC_cat_distal
GO:0007380	specification of segmental identity, head	14	402	0.48	0.004156	1012h	GO:0007380_1012h	ATAC_cat_distal
GO:0043433	negative regulation of sequence-specific DNA binding transcription factor activity	4	193	0.282	0.00416	1012h	GO:0043433_1012h	ATAC_cat_distal
GO:0032312	regulation of ARF GTPase activity	2	140	0.193	0.004414	1012h	GO:0032312_1012h	ATAC_cat_distal
GO:0035152	regulation of tube architecture, open tracheal system	13	378	0.474	0.004419	1012h	GO:0035152_1012h	ATAC_cat_distal
GO:0048102	autophagic cell death	19	496	0.53	0.004427	1012h	GO:0048102_1012h	ATAC_cat_distal
GO:0016321	female meiosis chromosome segregation	25	197	1.946	0.004428	1012h	GO:0016321_1012h	ATAC_cat_distal
GO:0035290	trunk segmentation	7	257	0.373	0.004456	1012h	GO:0035290_1012h	ATAC_cat_distal
GO:0007274	neuromuscular synaptic transmission	21	530	0.549	0.004576	1012h	GO:0007274_1012h	ATAC_cat_distal
GO:0045892	negative regulation of transcription, DNA-dependent	77	1493	0.722	0.004672	1012h	GO:0045892_1012h	ATAC_cat_distal
GO:0007538	primary sex determination	7	31	3.899	0.004713	1012h	GO:0007538_1012h	ATAC_cat_distal
GO:0007384	specification of segmental identity, thorax	12	359	0.461	0.00475	1012h	GO:0007384_1012h	ATAC_cat_distal
GO:0071390	cellular response to ecdysone	1	112	0.12	0.004808	1012h	GO:0071390_1012h	ATAC_cat_distal
GO:0014047	glutamate secretion	2	2	Inf	0.004853	1012h	GO:0014047_1012h	ATAC_cat_distal
GO:0006868	glutamine transport	2	2	Inf	0.004853	1012h	GO:0006868_1012h	ATAC_cat_distal
GO:0007633	pattern orientation	2	2	Inf	0.004853	1012h	GO:0007633_1012h	ATAC_cat_distal
GO:0001752	compound eye photoreceptor fate commitment	15	416	0.498	0.004885	1012h	GO:0001752_1012h	ATAC_cat_distal
GO:0007217	tachykinin receptor signaling pathway	4	11	7.636	0.005215	1012h	GO:0007217_1012h	ATAC_cat_distal
GO:0016044	cellular membrane organization	14	398	0.485	0.005381	1012h	GO:0016044_1012h	ATAC_cat_distal
GO:0035239	tube morphogenesis	9	296	0.418	0.005631	1012h	GO:0035239_1012h	ATAC_cat_distal
GO:0006378	mRNA polyadenylation	8	40	3.342	0.005671	1012h	GO:0006378_1012h	ATAC_cat_distal
GO:0000003	reproduction	7	32	3.743	0.005675	1012h	GO:0000003_1012h	ATAC_cat_distal
GO:0046958	nonassociative learning	7	32	3.743	0.005675	1012h	GO:0046958_1012h	ATAC_cat_distal
GO:0051124	synaptic growth at neuromuscular junction	16	430	0.515	0.005685	1012h	GO:0051124_1012h	ATAC_cat_distal
GO:0007517	muscle organ development	76	1468	0.725	0.005967	1012h	GO:0007517_1012h	ATAC_cat_distal
GO:0016055	Wnt receptor signaling pathway	60	1201	0.699	0.005986	1012h	GO:0016055_1012h	ATAC_cat_distal
GO:0042023	DNA endoreduplication	43	406	1.587	0.006046	1012h	GO:0042023_1012h	ATAC_cat_distal
GO:0015031	protein transport	15	104	2.254	0.006189	1012h	GO:0015031_1012h	ATAC_cat_distal
GO:0048806	genitalia development	0	77	0	0.006278	1012h	GO:0048806_1012h	ATAC_cat_distal
GO:0035052	dorsal vessel aortic cell fate commitment	2	137	0.198	0.006335	1012h	GO:0035052_1012h	ATAC_cat_distal
GO:0060969	negative regulation of gene silencing	2	137	0.198	0.006335	1012h	GO:0060969_1012h	ATAC_cat_distal
GO:0051781	positive regulation of cell division	6	25	4.221	0.006372	1012h	GO:0051781_1012h	ATAC_cat_distal
GO:0007509	mesoderm migration involved in gastrulation	11	332	0.456	0.006536	1012h	GO:0007509_1012h	ATAC_cat_distal
GO:0043401	steroid hormone mediated signaling pathway	24	578	0.577	0.006551	1012h	GO:0043401_1012h	ATAC_cat_distal
GO:0040023	establishment of nucleus localization	14	94	2.341	0.006643	1012h	GO:0040023_1012h	ATAC_cat_distal
GO:0051568	histone H3-K4 methylation	9	50	2.935	0.007084	1012h	GO:0051568_1012h	ATAC_cat_distal
GO:0051306	mitotic sister chromatid separation	4	12	6.682	0.007395	1012h	GO:0051306_1012h	ATAC_cat_distal
GO:0046856	phosphatidylinositol dephosphorylation	4	12	6.682	0.007395	1012h	GO:0046856_1012h	ATAC_cat_distal
GO:0070868	heterochromatin organization involved in chromatin silencing	4	12	6.682	0.007395	1012h	GO:0070868_1012h	ATAC_cat_distal
GO:0030727	germarium-derived female germ-line cyst formation	14	96	2.284	0.007631	1012h	GO:0030727_1012h	ATAC_cat_distal
GO:0035042	fertilization, exchange of chromosomal proteins	8	42	3.146	0.007693	1012h	GO:0035042_1012h	ATAC_cat_distal
GO:0035041	sperm chromatin decondensation	8	42	3.146	0.007693	1012h	GO:0035041_1012h	ATAC_cat_distal
GO:0007423	sensory organ development	59	1173	0.704	0.00771	1012h	GO:0007423_1012h	ATAC_cat_distal
GO:2000637	positive regulation of gene silencing by miRNA	5	201	0.34	0.007964	1012h	GO:2000637_1012h	ATAC_cat_distal
GO:0050774	negative regulation of dendrite morphogenesis	4	183	0.298	0.00798	1012h	GO:0050774_1012h	ATAC_cat_distal
GO:0009913	epidermal cell differentiation	9	51	2.865	0.008081	1012h	GO:0009913_1012h	ATAC_cat_distal
GO:0046907	intracellular transport	5	19	4.773	0.008337	1012h	GO:0046907_1012h	ATAC_cat_distal
GO:0007584	response to nutrient	27	230	1.78	0.008694	1012h	GO:0007584_1012h	ATAC_cat_distal
GO:0007442	hindgut morphogenesis	18	456	0.547	0.00943	1012h	GO:0007442_1012h	ATAC_cat_distal
GO:0009058	biosynthetic process	7	35	3.342	0.009447	1012h	GO:0009058_1012h	ATAC_cat_distal
GO:0048082	regulation of adult chitin-containing cuticle pigmentation	6	27	3.819	0.009452	1012h	GO:0048082_1012h	ATAC_cat_distal
GO:0006564	L-serine biosynthetic process	3	7	10.021	0.009556	1012h	GO:0006564_1012h	ATAC_cat_distal
GO:0006544	glycine metabolic process	3	7	10.021	0.009556	1012h	GO:0006544_1012h	ATAC_cat_distal
GO:0016246	RNA interference	27	235	1.737	0.009865	1012h	GO:0016246_1012h	ATAC_cat_distal
GO:0007451	dorsal/ventral lineage restriction, imaginal disc	8	261	0.421	0.009994	1012h	GO:0007451_1012h	ATAC_cat_distal
NA	NA	NA	NA	NA	NA	NA	NA	NA
GO:0003677	DNA binding	415	8384	0.705	0	24h	GO:0003677_24h	ATAC_cat_distal
GO:0030528	transcription regulator activity	397	8070	0.702	0	24h	GO:0030528_24h	ATAC_cat_distal
GO:0003700	transcription factor activity	397	8070	0.702	0	24h	GO:0003700_24h	ATAC_cat_distal
GO:0003676	nucleic acid binding	552	10501	0.749	0	24h	GO:0003676_24h	ATAC_cat_distal
GO:0005488	binding	917	15555	0.852	8.2e-05	24h	GO:0005488_24h	ATAC_cat_distal
GO:0008324	cation transmembrane transporter activity	57	554	1.654	0.000698	24h	GO:0008324_24h	ATAC_cat_distal
GO:0003729	mRNA binding	65	656	1.587	0.001031	24h	GO:0003729_24h	ATAC_cat_distal
GO:0031202	RNA splicing factor activity, transesterification mechanism	56	557	1.612	0.001349	24h	GO:0031202_24h	ATAC_cat_distal
GO:0003756	protein disulfide isomerase activity	9	43	3.798	0.00158	24h	GO:0003756_24h	ATAC_cat_distal
GO:0008143	poly(A) binding	26	213	1.999	0.001982	24h	GO:0008143_24h	ATAC_cat_distal
GO:0016298	lipase activity	24	196	2.006	0.003211	24h	GO:0016298_24h	ATAC_cat_distal
GO:0008066	glutamate receptor activity	7	33	3.861	0.004761	24h	GO:0008066_24h	ATAC_cat_distal
GO:0005319	lipid transporter activity	10	61	2.813	0.005848	24h	GO:0005319_24h	ATAC_cat_distal
GO:0008066	glutamate receptor activity	21	43	10.283	0	68h	GO:0008066_68h	ATAC_cat_distal
GO:0030528	transcription regulator activity	721	10394	0.767	0	68h	GO:0030528_68h	ATAC_cat_distal
GO:0003700	transcription factor activity	721	10394	0.767	0	68h	GO:0003700_68h	ATAC_cat_distal
GO:0003677	DNA binding	760	10768	0.783	0	68h	GO:0003677_68h	ATAC_cat_distal
GO:0003676	nucleic acid binding	977	13426	0.805	0	68h	GO:0003676_68h	ATAC_cat_distal
GO:0005488	binding	1497	19758	0.83	0	68h	GO:0005488_68h	ATAC_cat_distal
GO:0005083	small GTPase regulator activity	52	1090	0.533	2e-06	68h	GO:0005083_68h	ATAC_cat_distal
GO:0003756	protein disulfide isomerase activity	17	58	4.462	4e-06	68h	GO:0003756_68h	ATAC_cat_distal
GO:0015276	ligand-gated ion channel activity	37	221	2.167	8.3e-05	68h	GO:0015276_68h	ATAC_cat_distal
GO:0019207	kinase regulator activity	82	633	1.607	0.000183	68h	GO:0019207_68h	ATAC_cat_distal
GO:0019201	nucleotide kinase activity	2	144	0.151	0.000479	68h	GO:0019201_68h	ATAC_cat_distal
GO:0005216	ion channel activity	97	801	1.488	0.000554	68h	GO:0005216_68h	ATAC_cat_distal
GO:0016757	transferase activity, transferring glycosyl groups	57	419	1.698	0.000561	68h	GO:0016757_68h	ATAC_cat_distal
GO:0008237	metallopeptidase activity	47	345	1.699	0.001343	68h	GO:0008237_68h	ATAC_cat_distal
GO:0019210	kinase inhibitor activity	31	202	1.951	0.001394	68h	GO:0019210_68h	ATAC_cat_distal
GO:0005245	voltage-gated calcium channel activity	13	64	2.74	0.002585	68h	GO:0005245_68h	ATAC_cat_distal
GO:0005201	extracellular matrix structural constituent	20	420	0.535	0.003722	68h	GO:0005201_68h	ATAC_cat_distal
GO:0016407	acetyltransferase activity	50	402	1.53	0.006985	68h	GO:0016407_68h	ATAC_cat_distal
GO:0030528	transcription regulator activity	663	11265	0.81	1e-06	1012h	GO:0030528_1012h	ATAC_cat_distal
GO:0003700	transcription factor activity	663	11265	0.81	1e-06	1012h	GO:0003700_1012h	ATAC_cat_distal
GO:0003677	DNA binding	701	11736	0.824	3e-06	1012h	GO:0003677_1012h	ATAC_cat_distal
GO:0005201	extracellular matrix structural constituent	16	533	0.411	0.000107	1012h	GO:0005201_1012h	ATAC_cat_distal
GO:0043855	cyclic nucleotide-gated ion channel activity	12	55	3.733	0.000336	1012h	GO:0043855_1012h	ATAC_cat_distal
GO:0005261	cation channel activity	33	245	2.086	0.00034	1012h	GO:0005261_1012h	ATAC_cat_distal
GO:0005244	voltage-gated ion channel activity	33	246	2.076	0.000351	1012h	GO:0005244_1012h	ATAC_cat_distal
GO:0005249	voltage-gated potassium channel activity	24	164	2.295	0.000548	1012h	GO:0005249_1012h	ATAC_cat_distal
GO:0005216	ion channel activity	107	1109	1.435	0.000689	1012h	GO:0005216_1012h	ATAC_cat_distal
GO:0005488	binding	1467	22586	0.898	0.000792	1012h	GO:0005488_1012h	ATAC_cat_distal
GO:0008415	acyltransferase activity	67	640	1.569	0.000995	1012h	GO:0008415_1012h	ATAC_cat_distal
GO:0004672	protein kinase activity	188	2136	1.3	0.001031	1012h	GO:0004672_1012h	ATAC_cat_distal
GO:0016407	acetyltransferase activity	50	448	1.684	0.001046	1012h	GO:0016407_1012h	ATAC_cat_distal
GO:0031202	RNA splicing factor activity, transesterification mechanism	96	1005	1.418	0.001783	1012h	GO:0031202_1012h	ATAC_cat_distal
GO:0003676	nucleic acid binding	953	14862	0.895	0.002865	1012h	GO:0003676_1012h	ATAC_cat_distal
GO:0003729	mRNA binding	112	1219	1.359	0.003113	1012h	GO:0003729_1012h	ATAC_cat_distal
GO:0008143	poly(A) binding	45	418	1.617	0.003706	1012h	GO:0008143_1012h	ATAC_cat_distal
GO:0016740	transferase activity	388	4874	1.168	0.00563	1012h	GO:0016740_1012h	ATAC_cat_distal
GO:0016301	kinase activity	208	2486	1.229	0.006375	1012h	GO:0016301_1012h	ATAC_cat_distal
GO:0003724	RNA helicase activity	13	85	2.415	0.008009	1012h	GO:0003724_1012h	ATAC_cat_distal
GO:0004879	ligand-dependent nuclear receptor activity	23	546	0.585	0.008758	1012h	GO:0004879_1012h	ATAC_cat_distal
NA	NA	NA	NA	NA	NA	NA	NA	NA
GO:0006357	regulation of transcription from RNA polymerase II promoter	366	7312	0.721	0	24h	GO:0006357_24h	ATAC_cat_distal
GO:0006366	transcription from RNA polymerase II promoter	435	8434	0.742	0	24h	GO:0006366_24h	ATAC_cat_distal
GO:0006350	transcription	436	8440	0.743	0	24h	GO:0006350_24h	ATAC_cat_distal
GO:0007268	synaptic transmission	174	1766	1.599	0	24h	GO:0007268_24h	ATAC_cat_distal
GO:0007269	neurotransmitter secretion	60	452	2.215	0	24h	GO:0007269_24h	ATAC_cat_distal
GO:0003008	system process	459	5657	1.311	1e-06	24h	GO:0003008_24h	ATAC_cat_distal
GO:0050877	neurological system process	436	5362	1.312	1e-06	24h	GO:0050877_24h	ATAC_cat_distal
GO:0009790	embryonic development	117	2533	0.681	3.4e-05	24h	GO:0009790_24h	ATAC_cat_distal
GO:0006139	nucleobase, nucleoside, nucleotide and nucleic acid metabolic process	594	10447	0.83	6.3e-05	24h	GO:0006139_24h	ATAC_cat_distal
GO:0007274	neuromuscular synaptic transmission	91	920	1.589	8.6e-05	24h	GO:0007274_24h	ATAC_cat_distal
GO:0007498	mesoderm development	311	5715	0.804	0.000314	24h	GO:0007498_24h	ATAC_cat_distal
GO:0007389	pattern specification process	121	2495	0.719	0.000335	24h	GO:0007389_24h	ATAC_cat_distal
GO:0051180	vitamin transport	20	131	2.59	0.000474	24h	GO:0051180_24h	ATAC_cat_distal
GO:0007379	segment specification	75	1665	0.667	0.000476	24h	GO:0007379_24h	ATAC_cat_distal
GO:0006817	phosphate transport	21	149	2.358	0.000754	24h	GO:0006817_24h	ATAC_cat_distal
GO:0009187	cyclic nucleotide metabolic process	25	193	2.14	0.001068	24h	GO:0009187_24h	ATAC_cat_distal
GO:0009566	fertilization	32	268	1.951	0.001074	24h	GO:0009566_24h	ATAC_cat_distal
GO:0002376	immune system process	361	4739	1.205	0.001718	24h	GO:0002376_24h	ATAC_cat_distal
GO:0006378	mRNA polyadenylation	26	213	1.999	0.001982	24h	GO:0006378_24h	ATAC_cat_distal
GO:0031124	mRNA 3'-end processing	26	213	1.999	0.001982	24h	GO:0031124_24h	ATAC_cat_distal
GO:0007270	nerve-nerve synaptic transmission	23	182	2.079	0.002271	24h	GO:0007270_24h	ATAC_cat_distal
GO:0007517	muscle development	173	3274	0.787	0.002318	24h	GO:0007517_24h	ATAC_cat_distal
GO:0006968	cellular defense response	28	728	0.569	0.002381	24h	GO:0006968_24h	ATAC_cat_distal
GO:0016079	synaptic vesicle exocytosis	31	271	1.858	0.002727	24h	GO:0016079_24h	ATAC_cat_distal
GO:0006457	protein folding	19	141	2.237	0.002906	24h	GO:0006457_24h	ATAC_cat_distal
GO:0019236	response to pheromone	12	77	2.65	0.004088	24h	GO:0019236_24h	ATAC_cat_distal
GO:0007249	I-kappaB kinase/NF-kappaB cascade	21	168	2.053	0.004183	24h	GO:0007249_24h	ATAC_cat_distal
GO:0008202	steroid metabolic process	29	262	1.789	0.005381	24h	GO:0008202_24h	ATAC_cat_distal
GO:0032568	general transcription from RNA polymerase II promoter	12	375	0.471	0.006111	24h	GO:0032568_24h	ATAC_cat_distal
GO:0007600	sensory perception	179	2250	1.252	0.006625	24h	GO:0007600_24h	ATAC_cat_distal
GO:0006397	mRNA processing	74	826	1.419	0.00674	24h	GO:0006397_24h	ATAC_cat_distal
GO:0006858	extracellular transport	30	278	1.739	0.006916	24h	GO:0006858_24h	ATAC_cat_distal
GO:0006790	sulfur metabolic process	1	116	0.124	0.007202	24h	GO:0006790_24h	ATAC_cat_distal
GO:0001525	angiogenesis	65	1357	0.714	0.007358	24h	GO:0001525_24h	ATAC_cat_distal
GO:0006956	complement activation	16	125	2.107	0.009576	24h	GO:0006956_24h	ATAC_cat_distal
GO:0006766	vitamin metabolic process	18	144	2.051	0.009732	24h	GO:0006766_24h	ATAC_cat_distal
GO:0016072	rRNA metabolic process	23	204	1.825	0.009938	24h	GO:0016072_24h	ATAC_cat_distal
GO:0007498	mesoderm development	474	7358	0.712	0	68h	GO:0007498_68h	ATAC_cat_distal
GO:0006357	regulation of transcription from RNA polymerase II promoter	651	9428	0.766	0	68h	GO:0006357_68h	ATAC_cat_distal
GO:0006350	transcription	760	10789	0.781	0	68h	GO:0006350_68h	ATAC_cat_distal
GO:0006366	transcription from RNA polymerase II promoter	760	10784	0.781	0	68h	GO:0006366_68h	ATAC_cat_distal
GO:0007270	nerve-nerve synaptic transmission	47	210	3.114	0	68h	GO:0007270_68h	ATAC_cat_distal
GO:0007517	muscle development	268	4228	0.711	0	68h	GO:0007517_68h	ATAC_cat_distal
GO:0009566	fertilization	51	288	2.323	1e-06	68h	GO:0009566_68h	ATAC_cat_distal
GO:0032502	developmental process	974	13053	0.834	1e-06	68h	GO:0032502_68h	ATAC_cat_distal
GO:0006139	nucleobase, nucleoside, nucleotide and nucleic acid metabolic process	993	13240	0.839	1e-06	68h	GO:0006139_68h	ATAC_cat_distal
GO:0001525	angiogenesis	89	1609	0.622	5e-06	68h	GO:0001525_68h	ATAC_cat_distal
GO:0048731	system development	775	10463	0.833	5e-06	68h	GO:0048731_68h	ATAC_cat_distal
GO:0006124	ferredoxin metabolic process	9	19	9.675	1e-05	68h	GO:0006124_68h	ATAC_cat_distal
GO:0009790	embryonic development	219	3323	0.746	2.4e-05	68h	GO:0009790_68h	ATAC_cat_distal
GO:0007389	pattern specification process	214	3213	0.756	7.3e-05	68h	GO:0007389_68h	ATAC_cat_distal
GO:0007269	neurotransmitter secretion	75	556	1.684	8.9e-05	68h	GO:0007269_68h	ATAC_cat_distal
GO:0019538	protein metabolic process	697	7152	1.184	0.000104	68h	GO:0019538_68h	ATAC_cat_distal
GO:0007606	sensory perception of chemical stimulus	42	274	1.951	0.000196	68h	GO:0007606_68h	ATAC_cat_distal
GO:0006457	protein folding	31	184	2.182	0.000272	68h	GO:0006457_68h	ATAC_cat_distal
GO:0007379	segment specification	143	2203	0.738	0.000345	68h	GO:0007379_68h	ATAC_cat_distal
GO:0007041	lysosomal transport	7	19	6.268	0.000652	68h	GO:0007041_68h	ATAC_cat_distal
GO:0001501	skeletal development	139	2121	0.746	0.000754	68h	GO:0001501_68h	ATAC_cat_distal
GO:0002376	immune system process	584	6030	1.17	0.000791	68h	GO:0002376_68h	ATAC_cat_distal
GO:0006928	cell motility	260	3683	0.805	0.000894	68h	GO:0006928_68h	ATAC_cat_distal
GO:0019236	response to pheromone	16	80	2.688	0.001048	68h	GO:0019236_68h	ATAC_cat_distal
GO:0032568	general transcription from RNA polymerase II promoter	19	433	0.491	0.001298	68h	GO:0032568_68h	ATAC_cat_distal
GO:0007502	gut mesoderm development	87	1391	0.711	0.001841	68h	GO:0007502_68h	ATAC_cat_distal
GO:0007398	ectoderm development	652	8496	0.876	0.002363	68h	GO:0007398_68h	ATAC_cat_distal
GO:0050909	sensory perception of taste	29	191	1.927	0.002483	68h	GO:0050909_68h	ATAC_cat_distal
GO:0006807	nitrogen compound metabolic process	16	86	2.458	0.002779	68h	GO:0006807_68h	ATAC_cat_distal
GO:0006956	complement activation	27	178	1.924	0.002949	68h	GO:0006956_68h	ATAC_cat_distal
GO:0006909	phagocytosis	1	98	0.11	0.003113	68h	GO:0006909_68h	ATAC_cat_distal
GO:0007268	synaptic transmission	223	2171	1.239	0.00374	68h	GO:0007268_68h	ATAC_cat_distal
GO:0050828	regulation of liquid surface tension	3	134	0.245	0.004828	68h	GO:0050828_68h	ATAC_cat_distal
GO:0007169	transmembrane receptor protein tyrosine kinase signaling pathway	83	1292	0.733	0.005542	68h	GO:0007169_68h	ATAC_cat_distal
GO:0006898	receptor-mediated endocytosis	18	382	0.529	0.005613	68h	GO:0006898_68h	ATAC_cat_distal
GO:0007601	visual perception	142	2068	0.785	0.005646	68h	GO:0007601_68h	ATAC_cat_distal
GO:0007399	nervous system development	638	8244	0.886	0.005777	68h	GO:0007399_68h	ATAC_cat_distal
GO:0006897	endocytosis	59	966	0.695	0.006219	68h	GO:0006897_68h	ATAC_cat_distal
GO:0016337	cell-cell adhesion	214	2984	0.822	0.006421	68h	GO:0016337_68h	ATAC_cat_distal
GO:0042116	macrophage activation	23	446	0.582	0.008209	68h	GO:0042116_68h	ATAC_cat_distal
GO:0050877	neurological system process	642	6854	1.125	0.008789	68h	GO:0050877_68h	ATAC_cat_distal
GO:0001501	skeletal development	98	2253	0.6	0	1012h	GO:0001501_1012h	ATAC_cat_distal
GO:0006357	regulation of transcription from RNA polymerase II promoter	595	10148	0.809	2e-06	1012h	GO:0006357_1012h	ATAC_cat_distal
GO:0007498	mesoderm development	480	8353	0.795	2e-06	1012h	GO:0007498_1012h	ATAC_cat_distal
GO:0019538	protein metabolic process	717	8777	1.219	4e-06	1012h	GO:0019538_1012h	ATAC_cat_distal
GO:0006464	protein modification process	436	5065	1.282	4e-06	1012h	GO:0006464_1012h	ATAC_cat_distal
GO:0009790	embryonic development	189	3565	0.738	3.8e-05	1012h	GO:0009790_1012h	ATAC_cat_distal
GO:0006350	transcription	717	11717	0.849	6.8e-05	1012h	GO:0006350_1012h	ATAC_cat_distal
GO:0006366	transcription from RNA polymerase II promoter	717	11712	0.849	7.3e-05	1012h	GO:0006366_1012h	ATAC_cat_distal
GO:0007502	gut mesoderm development	60	1341	0.621	0.000147	1012h	GO:0007502_1012h	ATAC_cat_distal
GO:0006124	ferredoxin metabolic process	8	25	6.293	0.000203	1012h	GO:0006124_1012h	ATAC_cat_distal
GO:0009110	vitamin biosynthetic process	0	112	0	0.00057	1012h	GO:0009110_1012h	ATAC_cat_distal
GO:0007507	heart development	90	1802	0.697	0.000612	1012h	GO:0007507_1012h	ATAC_cat_distal
GO:0007389	pattern specification process	194	3460	0.785	0.001014	1012h	GO:0007389_1012h	ATAC_cat_distal
GO:0006936	muscle contraction	190	2161	1.299	0.001095	1012h	GO:0006936_1012h	ATAC_cat_distal
GO:0007530	sex determination	70	695	1.503	0.002074	1012h	GO:0007530_1012h	ATAC_cat_distal
GO:0009948	anterior/posterior axis specification	26	645	0.559	0.002341	1012h	GO:0009948_1012h	ATAC_cat_distal
GO:0006468	protein amino acid phosphorylation	239	2843	1.237	0.002627	1012h	GO:0006468_1012h	ATAC_cat_distal
GO:0006457	protein folding	26	205	1.945	0.003403	1012h	GO:0006457_1012h	ATAC_cat_distal
GO:0006378	mRNA polyadenylation	45	418	1.617	0.003706	1012h	GO:0006378_1012h	ATAC_cat_distal
GO:0031124	mRNA 3'-end processing	45	418	1.617	0.003706	1012h	GO:0031124_1012h	ATAC_cat_distal
GO:0006139	nucleobase, nucleoside, nucleotide and nucleic acid metabolic process	953	14827	0.898	0.003803	1012h	GO:0006139_1012h	ATAC_cat_distal
GO:0007601	visual perception	142	2555	0.78	0.00385	1012h	GO:0007601_1012h	ATAC_cat_distal
GO:0007274	neuromuscular synaptic transmission	129	1451	1.311	0.004851	1012h	GO:0007274_1012h	ATAC_cat_distal
GO:0006898	receptor-mediated endocytosis	19	488	0.539	0.005498	1012h	GO:0006898_1012h	ATAC_cat_distal
GO:0000398	nuclear mRNA splicing, via spliceosome	108	1192	1.338	0.0058	1012h	GO:0000398_1012h	ATAC_cat_distal
GO:0006807	nitrogen compound metabolic process	14	92	2.401	0.00584	1012h	GO:0006807_1012h	ATAC_cat_distal
GO:0006796	phosphate metabolic process	70	724	1.435	0.006444	1012h	GO:0006796_1012h	ATAC_cat_distal
GO:0001525	angiogenesis	96	1774	0.759	0.008144	1012h	GO:0001525_1012h	ATAC_cat_distal
GO:0007608	sensory perception of smell	16	116	2.14	0.00894	1012h	GO:0007608_1012h	ATAC_cat_distal
GO:0007269	neurotransmitter secretion	65	679	1.419	0.009848	1012h	GO:0007269_1012h	ATAC_cat_distal
NA	NA	NA	NA	NA	NA	NA	NA	NA
FBbt:00005518	somatic muscle primordium	80	2296	0.504	0	24h	FBbt:00005518_24h	ATAC_cat_distal
FBbt:00005428	dorsal ectoderm anlage	229	4990	0.663	0	24h	FBbt:00005428_24h	ATAC_cat_distal
FBbt:00015256	central brain anlage	244	5121	0.692	0	24h	FBbt:00015256_24h	ATAC_cat_distal
FBbt:0000610	early embryonic segmentation	83	2171	0.557	0	24h	FBbt:0000610_24h	ATAC_cat_distal
FBbt:00015253	antennal anlage	236	4906	0.7	0	24h	FBbt:00015253_24h	ATAC_cat_distal
FBbt:00005434	visual anlage	245	5030	0.71	0	24h	FBbt:00005434_24h	ATAC_cat_distal
FBbt:00005558	ventral ectoderm	315	6190	0.741	0	24h	FBbt:00005558_24h	ATAC_cat_distal
FBbt:00004204	ventral ectoderm anlage	206	4296	0.701	1e-06	24h	FBbt:00004204_24h	ATAC_cat_distal
FBbt:00015248	dorsal head epidermis anlage	251	4979	0.738	4e-06	24h	FBbt:00015248_24h	ATAC_cat_distal
FBbt:00005415	central brain anlage in statu nascendi	186	3847	0.71	5e-06	24h	FBbt:00005415_24h	ATAC_cat_distal
FBbt:00015252	antennal anlage in statu nascendi	188	3875	0.712	5e-06	24h	FBbt:00015252_24h	ATAC_cat_distal
FBbt:00015255	ventral head epidermis primordium	262	5153	0.745	5e-06	24h	FBbt:00015255_24h	ATAC_cat_distal
FBbt:00005425	visual anlage in statu nascendi	189	3882	0.715	6e-06	24h	FBbt:00005425_24h	ATAC_cat_distal
FBbt:00014203	lateral head epidermis primordium	261	5120	0.747	7e-06	24h	FBbt:00014203_24h	ATAC_cat_distal
FBbt:00005541	cardiogenic mesoderm	16	627	0.372	9e-06	24h	FBbt:00005541_24h	ATAC_cat_distal
FBbt:00015249	dorsal head epidermis anlage in statu nascendi	188	3845	0.719	9e-06	24h	FBbt:00015249_24h	ATAC_cat_distal
FBbt:00005744	embryonic dorsal epidermis	335	6330	0.775	1.3e-05	24h	FBbt:00005744_24h	ATAC_cat_distal
FBbt:00001059	visual primordium	242	4694	0.759	3.9e-05	24h	FBbt:00001059_24h	ATAC_cat_distal
FBbt:00005554	ventral nerve cord primordium	395	7244	0.8	4.3e-05	24h	FBbt:00005554_24h	ATAC_cat_distal
FBbt:00015247	dorsal head epidermis primordium	271	5180	0.77	4.3e-05	24h	FBbt:00015247_24h	ATAC_cat_distal
FBbt:00005510	antennal primordium	262	5030	0.767	4.4e-05	24h	FBbt:00005510_24h	ATAC_cat_distal
FBbt:00001673	embryonic/larval dorsal vessel	67	1597	0.619	5.6e-05	24h	FBbt:00001673_24h	ATAC_cat_distal
FBbt:00005533	ventral epidermis primordium	267	5071	0.776	7.9e-05	24h	FBbt:00005533_24h	ATAC_cat_distal
FBbt:00005606	embryonic foregut	135	2815	0.708	8.1e-05	24h	FBbt:00005606_24h	ATAC_cat_distal
FBbt:00005519	visceral muscle primordium	132	2758	0.707	8.2e-05	24h	FBbt:00005519_24h	ATAC_cat_distal
FBbt:00005747	embryonic ventral epidermis	284	5316	0.788	0.000158	24h	FBbt:00005747_24h	ATAC_cat_distal
FBbt:00000128	trunk mesoderm	269	5052	0.786	0.000183	24h	FBbt:00000128_24h	ATAC_cat_distal
FBbt:00005673	lateral cord glial cell	90	1956	0.681	0.00026	24h	FBbt:00005673_24h	ATAC_cat_distal
FBbt:00000441	hindgut proper primordium	204	3927	0.769	0.000301	24h	FBbt:00000441_24h	ATAC_cat_distal
FBbt:00005552	ventral sensory complex primordium	52	1235	0.623	0.00055	24h	FBbt:00005552_24h	ATAC_cat_distal
FBbt:00005442	hypopharynx anlage	9	369	0.356	0.000622	24h	FBbt:00005442_24h	ATAC_cat_distal
FBbt:00005630	embryonic hindgut	238	4454	0.792	0.000638	24h	FBbt:00005630_24h	ATAC_cat_distal
FBbt:00005619	embryonic labial sensory complex	53	503	1.698	0.000714	24h	FBbt:00005619_24h	ATAC_cat_distal
FBbt:00005665	embryonic central brain neuron	110	2262	0.722	0.000767	24h	FBbt:00005665_24h	ATAC_cat_distal
FBbt:00000112	dorsal ectoderm	272	5009	0.805	0.000772	24h	FBbt:00000112_24h	ATAC_cat_distal
FBbt:00001369	neuroblast of ventral nerve cord primordium	51	1199	0.63	0.000879	24h	FBbt:00001369_24h	ATAC_cat_distal
FBbt:00005535	foregut primordium	195	3703	0.782	0.000981	24h	FBbt:00005535_24h	ATAC_cat_distal
FBbt:00005498	dorsal pharyngeal muscle primordium	21	605	0.511	0.001188	24h	FBbt:00005498_24h	ATAC_cat_distal
FBbt:10005329	posterior midgut primordium	237	4387	0.802	0.001314	24h	FBbt:10005329_24h	ATAC_cat_distal
FBbt:00005466	pericardial cell primordium	3	200	0.217	0.001387	24h	FBbt:00005466_24h	ATAC_cat_distal
FBbt:00000444	anterior midgut primordium	216	4011	0.801	0.001866	24h	FBbt:00000444_24h	ATAC_cat_distal
FBbt:00005424	hindgut anlage in statu nascendi	47	1090	0.64	0.001887	24h	FBbt:00005424_24h	ATAC_cat_distal
FBbt:00005745	embryonic dorsal apodeme	14	439	0.469	0.002529	24h	FBbt:00005745_24h	ATAC_cat_distal
FBbt:00005542	central brain primordium	434	7529	0.855	0.003121	24h	FBbt:00005542_24h	ATAC_cat_distal
FBbt:00015254	ventral head epidermis	5	237	0.307	0.003318	24h	FBbt:00015254_24h	ATAC_cat_distal
FBbt:00005523	inclusive hindgut primordium	116	2286	0.756	0.003586	24h	FBbt:00005523_24h	ATAC_cat_distal
FBbt:00005526	dorsal epidermis primordium	279	4997	0.831	0.003973	24h	FBbt:00005526_24h	ATAC_cat_distal
FBbt:00005631	embryonic small intestine	10	346	0.424	0.004184	24h	FBbt:00005631_24h	ATAC_cat_distal
FBbt:00005037	tracheal primordium	95	1909	0.742	0.004481	24h	FBbt:00005037_24h	ATAC_cat_distal
FBbt:00001069	embryonic stomatogastric nervous system	33	794	0.617	0.004654	24h	FBbt:00001069_24h	ATAC_cat_distal
FBbt:00004202	hindgut anlage	96	1918	0.746	0.005294	24h	FBbt:00004202_24h	ATAC_cat_distal
FBbt:00001035	embryonic/larval visceral muscle	117	2274	0.768	0.00532	24h	FBbt:00001035_24h	ATAC_cat_distal
FBbt:00005805	Bolwig organ	19	521	0.539	0.005507	24h	FBbt:00005805_24h	ATAC_cat_distal
FBbt:00001665	dorsal vessel primordium	8	289	0.406	0.00581	24h	FBbt:00001665_24h	ATAC_cat_distal
FBbt:00001667	embryonic/larval pericardial cell	13	394	0.486	0.00736	24h	FBbt:00001667_24h	ATAC_cat_distal
FBbt:00005613	embryonic hypopharynx	157	2923	0.802	0.008498	24h	FBbt:00005613_24h	ATAC_cat_distal
FBbt:00000210	anterior endoderm anlage	144	2697	0.798	0.00903	24h	FBbt:00000210_24h	ATAC_cat_distal
FBbt:00005531	salivary gland duct primordium	18	145	2.035	0.009987	24h	FBbt:00005531_24h	ATAC_cat_distal
FBbt:00005428	dorsal ectoderm anlage	337	5837	0.634	0	68h	FBbt:00005428_68h	ATAC_cat_distal
FBbt:00015255	ventral head epidermis primordium	390	6335	0.68	0	68h	FBbt:00015255_68h	ATAC_cat_distal
FBbt:00014203	lateral head epidermis primordium	389	6291	0.683	0	68h	FBbt:00014203_68h	ATAC_cat_distal
FBbt:00005558	ventral ectoderm	473	7397	0.706	0	68h	FBbt:00005558_68h	ATAC_cat_distal
FBbt:00015247	dorsal head epidermis primordium	400	6379	0.694	0	68h	FBbt:00015247_68h	ATAC_cat_distal
FBbt:00015253	antennal anlage	363	5877	0.684	0	68h	FBbt:00015253_68h	ATAC_cat_distal
FBbt:00005510	antennal primordium	390	6230	0.693	0	68h	FBbt:00005510_68h	ATAC_cat_distal
FBbt:00015256	central brain anlage	383	6127	0.693	0	68h	FBbt:00015256_68h	ATAC_cat_distal
FBbt:00005434	visual anlage	378	6035	0.695	0	68h	FBbt:00005434_68h	ATAC_cat_distal
FBbt:00015248	dorsal head epidermis anlage	378	5971	0.704	0	68h	FBbt:00015248_68h	ATAC_cat_distal
FBbt:00004204	ventral ectoderm anlage	306	4992	0.682	0	68h	FBbt:00004204_68h	ATAC_cat_distal
FBbt:00001059	visual primordium	368	5792	0.707	0	68h	FBbt:00001059_68h	ATAC_cat_distal
FBbt:00005554	ventral nerve cord primordium	620	9072	0.758	0	68h	FBbt:00005554_68h	ATAC_cat_distal
FBbt:00005533	ventral epidermis primordium	413	6364	0.723	0	68h	FBbt:00005533_68h	ATAC_cat_distal
FBbt:00005673	lateral cord glial cell	129	2464	0.582	0	68h	FBbt:00005673_68h	ATAC_cat_distal
FBbt:00015252	antennal anlage in statu nascendi	293	4708	0.695	0	68h	FBbt:00015252_68h	ATAC_cat_distal
FBbt:0000610	early embryonic segmentation	138	2523	0.611	0	68h	FBbt:0000610_68h	ATAC_cat_distal
FBbt:00015249	dorsal head epidermis anlage in statu nascendi	294	4663	0.705	0	68h	FBbt:00015249_68h	ATAC_cat_distal
FBbt:00005415	central brain anlage in statu nascendi	296	4670	0.71	0	68h	FBbt:00005415_68h	ATAC_cat_distal
FBbt:00005425	visual anlage in statu nascendi	304	4739	0.719	0	68h	FBbt:00005425_68h	ATAC_cat_distal
FBbt:00005630	embryonic hindgut	389	5855	0.744	0	68h	FBbt:00005630_68h	ATAC_cat_distal
FBbt:00005744	embryonic dorsal epidermis	553	7953	0.778	0	68h	FBbt:00005744_68h	ATAC_cat_distal
FBbt:00005541	cardiogenic mesoderm	31	816	0.42	0	68h	FBbt:00005541_68h	ATAC_cat_distal
FBbt:00005613	embryonic hypopharynx	232	3718	0.701	0	68h	FBbt:00005613_68h	ATAC_cat_distal
FBbt:00005526	dorsal epidermis primordium	433	6331	0.768	0	68h	FBbt:00005526_68h	ATAC_cat_distal
FBbt:00005535	foregut primordium	319	4791	0.75	1e-06	68h	FBbt:00005535_68h	ATAC_cat_distal
FBbt:00000210	anterior endoderm anlage	204	3234	0.711	2e-06	68h	FBbt:00000210_68h	ATAC_cat_distal
FBbt:00000112	dorsal ectoderm	432	6197	0.786	2e-06	68h	FBbt:00000112_68h	ATAC_cat_distal
FBbt:00005518	somatic muscle primordium	186	2971	0.706	3e-06	68h	FBbt:00005518_68h	ATAC_cat_distal
FBbt:00005619	embryonic labial sensory complex	96	695	1.734	3e-06	68h	FBbt:00005619_68h	ATAC_cat_distal
FBbt:00001369	neuroblast of ventral nerve cord primordium	86	1580	0.611	3e-06	68h	FBbt:00001369_68h	ATAC_cat_distal
FBbt:00005427	ectoderm anlage	82	1525	0.604	3e-06	68h	FBbt:00005427_68h	ATAC_cat_distal
FBbt:00005423	foregut anlage in statu nascendi	83	1537	0.606	3e-06	68h	FBbt:00005423_68h	ATAC_cat_distal
FBbt:00005747	embryonic ventral epidermis	477	6710	0.803	8e-06	68h	FBbt:00005747_68h	ATAC_cat_distal
FBbt:00000441	hindgut proper primordium	355	5130	0.783	1.1e-05	68h	FBbt:00000441_68h	ATAC_cat_distal
FBbt:00000128	trunk mesoderm	441	6227	0.801	1.1e-05	68h	FBbt:00000128_68h	ATAC_cat_distal
FBbt:00005542	central brain primordium	705	9515	0.836	1.8e-05	68h	FBbt:00005542_68h	ATAC_cat_distal
FBbt:00005606	embryonic foregut	247	3674	0.762	3.8e-05	68h	FBbt:00005606_68h	ATAC_cat_distal
FBbt:00005675	lateral cord neuron	231	3429	0.765	8.1e-05	68h	FBbt:00005675_68h	ATAC_cat_distal
FBbt:00005663	embryonic central brain glial cell	131	2097	0.708	9.3e-05	68h	FBbt:00005663_68h	ATAC_cat_distal
FBbt:00000104	mesoderm anlage	100	1661	0.681	0.000124	68h	FBbt:00000104_68h	ATAC_cat_distal
FBbt:00005431	foregut anlage	117	1894	0.7	0.000138	68h	FBbt:00005431_68h	ATAC_cat_distal
FBbt:00005442	hypopharynx anlage	20	479	0.466	0.000276	68h	FBbt:00005442_68h	ATAC_cat_distal
FBbt:00001333	procephalic neuroblast	73	1255	0.658	0.000338	68h	FBbt:00001333_68h	ATAC_cat_distal
FBbt:00005523	inclusive hindgut primordium	196	2888	0.773	0.000489	68h	FBbt:00005523_68h	ATAC_cat_distal
FBbt:00005503	hypopharynx inclusive primordium	29	602	0.541	0.000545	68h	FBbt:00005503_68h	ATAC_cat_distal
FBbt:00007281	epiphysis	100	830	1.48	0.000549	68h	FBbt:00007281_68h	ATAC_cat_distal
FBbt:00005617	labral sensory complex	100	830	1.48	0.000549	68h	FBbt:00005617_68h	ATAC_cat_distal
FBbt:00004891	pole plasm	58	433	1.668	0.000693	68h	FBbt:00004891_68h	ATAC_cat_distal
FBbt:00016002	hypopharynx proper primordium	55	974	0.638	0.000773	68h	FBbt:00016002_68h	ATAC_cat_distal
FBbt:00005466	pericardial cell primordium	7	236	0.327	0.000947	68h	FBbt:00005466_68h	ATAC_cat_distal
FBbt:00005538	clypeo-labral primordium	243	3454	0.803	0.00109	68h	FBbt:00005538_68h	ATAC_cat_distal
FBbt:00005665	embryonic central brain neuron	196	2843	0.787	0.001208	68h	FBbt:00005665_68h	ATAC_cat_distal
FBbt:00005643	embryonic Malpighian tubule tip cell	6	211	0.313	0.001222	68h	FBbt:00005643_68h	ATAC_cat_distal
FBbt:00001069	embryonic stomatogastric nervous system	60	1022	0.665	0.001535	68h	FBbt:00001069_68h	ATAC_cat_distal
FBbt:00004202	hindgut anlage	165	2426	0.776	0.001594	68h	FBbt:00004202_68h	ATAC_cat_distal
FBbt:00005037	tracheal primordium	161	2374	0.774	0.001617	68h	FBbt:00005037_68h	ATAC_cat_distal
FBbt:00005552	ventral sensory complex primordium	108	1669	0.737	0.00184	68h	FBbt:00005552_68h	ATAC_cat_distal
FBbt:00017019	cibarium primordium	186	2688	0.79	0.00209	68h	FBbt:00017019_68h	ATAC_cat_distal
FBbt:00001716	corpus allatum primordium	3	143	0.23	0.002455	68h	FBbt:00001716_68h	ATAC_cat_distal
FBbt:00005805	Bolwig organ	32	608	0.594	0.002692	68h	FBbt:00005805_68h	ATAC_cat_distal
FBbt:00005633	embryonic rectum	32	609	0.593	0.002698	68h	FBbt:00005633_68h	ATAC_cat_distal
FBbt:00000109	mesectoderm anlage	39	707	0.624	0.002826	68h	FBbt:00000109_68h	ATAC_cat_distal
FBbt:00004860	germline cell	72	601	1.467	0.003276	68h	FBbt:00004860_68h	ATAC_cat_distal
FBbt:00005550	proventriculus primordium	81	1285	0.718	0.003352	68h	FBbt:00005550_68h	ATAC_cat_distal
FBbt:00015254	ventral head epidermis	11	282	0.434	0.003633	68h	FBbt:00015254_68h	ATAC_cat_distal
FBbt:00000092	pole cell	83	712	1.423	0.003639	68h	FBbt:00000092_68h	ATAC_cat_distal
FBbt:00001673	embryonic/larval dorsal vessel	140	2057	0.778	0.003808	68h	FBbt:00001673_68h	ATAC_cat_distal
FBbt:00005631	embryonic small intestine	22	446	0.555	0.004813	68h	FBbt:00005631_68h	ATAC_cat_distal
FBbt:00017017	amnioserosa anlage	61	1000	0.694	0.005045	68h	FBbt:00017017_68h	ATAC_cat_distal
FBbt:00005509	embryonic dorsal pouch primordium	4	151	0.291	0.005259	68h	FBbt:00005509_68h	ATAC_cat_distal
FBbt:00001685	plasmatocyte	41	309	1.647	0.005465	68h	FBbt:00001685_68h	ATAC_cat_distal
FBbt:0000611	NA	343	3497	1.179	0.006009	68h	FBbt:0000611_68h	ATAC_cat_distal
FBbt:00000127	head mesoderm	372	4961	0.86	0.006765	68h	FBbt:00000127_68h	ATAC_cat_distal
FBbt:00005745	embryonic dorsal apodeme	27	514	0.593	0.006766	68h	FBbt:00005745_68h	ATAC_cat_distal
FBbt:00005668	embryonic frontal ganglion	1	83	0.131	0.009502	68h	FBbt:00005668_68h	ATAC_cat_distal
FBbt:00015256	central brain anlage	280	6223	0.607	0	1012h	FBbt:00015256_1012h	ATAC_cat_distal
FBbt:00005428	dorsal ectoderm anlage	278	6132	0.613	0	1012h	FBbt:00005428_1012h	ATAC_cat_distal
FBbt:00015253	antennal anlage	270	5946	0.615	0	1012h	FBbt:00015253_1012h	ATAC_cat_distal
FBbt:00015248	dorsal head epidermis anlage	278	6042	0.623	0	1012h	FBbt:00015248_1012h	ATAC_cat_distal
FBbt:00005510	antennal primordium	293	6280	0.632	0	1012h	FBbt:00005510_1012h	ATAC_cat_distal
FBbt:00005434	visual anlage	283	6104	0.628	0	1012h	FBbt:00005434_1012h	ATAC_cat_distal
FBbt:00015247	dorsal head epidermis primordium	306	6469	0.641	0	1012h	FBbt:00015247_1012h	ATAC_cat_distal
FBbt:00014203	lateral head epidermis primordium	301	6370	0.641	0	1012h	FBbt:00014203_1012h	ATAC_cat_distal
FBbt:00001059	visual primordium	274	5836	0.638	0	1012h	FBbt:00001059_1012h	ATAC_cat_distal
FBbt:00015255	ventral head epidermis primordium	307	6386	0.653	0	1012h	FBbt:00015255_1012h	ATAC_cat_distal
FBbt:00004204	ventral ectoderm anlage	231	5070	0.62	0	1012h	FBbt:00004204_1012h	ATAC_cat_distal
FBbt:00005558	ventral ectoderm	385	7634	0.685	0	1012h	FBbt:00005558_1012h	ATAC_cat_distal
FBbt:00005554	ventral nerve cord primordium	512	9666	0.718	0	1012h	FBbt:00005554_1012h	ATAC_cat_distal
FBbt:00015249	dorsal head epidermis anlage in statu nascendi	218	4715	0.631	0	1012h	FBbt:00015249_1012h	ATAC_cat_distal
FBbt:00005415	central brain anlage in statu nascendi	219	4714	0.635	0	1012h	FBbt:00005415_1012h	ATAC_cat_distal
FBbt:00015252	antennal anlage in statu nascendi	223	4735	0.644	0	1012h	FBbt:00015252_1012h	ATAC_cat_distal
FBbt:00005425	visual anlage in statu nascendi	226	4773	0.648	0	1012h	FBbt:00005425_1012h	ATAC_cat_distal
FBbt:00005542	central brain primordium	549	10036	0.745	0	1012h	FBbt:00005542_1012h	ATAC_cat_distal
FBbt:0000610	early embryonic segmentation	107	2589	0.567	0	1012h	FBbt:0000610_1012h	ATAC_cat_distal
FBbt:00005673	lateral cord glial cell	111	2659	0.572	0	1012h	FBbt:00005673_1012h	ATAC_cat_distal
FBbt:00005518	somatic muscle primordium	149	3226	0.636	0	1012h	FBbt:00005518_1012h	ATAC_cat_distal
FBbt:00004891	pole plasm	77	584	2.044	0	1012h	FBbt:00004891_1012h	ATAC_cat_distal
FBbt:00000112	dorsal ectoderm	351	6455	0.751	0	1012h	FBbt:00000112_1012h	ATAC_cat_distal
FBbt:00005413	anlage in statu nascendi	145	3052	0.656	0	1012h	FBbt:00005413_1012h	ATAC_cat_distal
FBbt:00005613	embryonic hypopharynx	235	4459	0.73	2e-06	1012h	FBbt:00005613_1012h	ATAC_cat_distal
FBbt:00005523	inclusive hindgut primordium	151	3066	0.682	2e-06	1012h	FBbt:00005523_1012h	ATAC_cat_distal
FBbt:00005535	foregut primordium	281	5151	0.757	5e-06	1012h	FBbt:00005535_1012h	ATAC_cat_distal
FBbt:00005519	visceral muscle primordium	212	4030	0.73	7e-06	1012h	FBbt:00005519_1012h	ATAC_cat_distal
FBbt:00004202	hindgut anlage	123	2550	0.669	7e-06	1012h	FBbt:00004202_1012h	ATAC_cat_distal
FBbt:00005512	salivary gland body primordium	93	840	1.675	1.1e-05	1012h	FBbt:00005512_1012h	ATAC_cat_distal
FBbt:00005675	lateral cord neuron	198	3773	0.729	1.2e-05	1012h	FBbt:00005675_1012h	ATAC_cat_distal
FBbt:00005531	salivary gland duct primordium	33	209	2.514	1.4e-05	1012h	FBbt:00005531_1012h	ATAC_cat_distal
FBbt:00005663	embryonic central brain glial cell	107	2232	0.665	1.9e-05	1012h	FBbt:00005663_1012h	ATAC_cat_distal
FBbt:00001369	neuroblast of ventral nerve cord primordium	74	1645	0.624	3e-05	1012h	FBbt:00001369_1012h	ATAC_cat_distal
FBbt:00005533	ventral epidermis primordium	377	6553	0.8	3.7e-05	1012h	FBbt:00005533_1012h	ATAC_cat_distal
FBbt:00005423	foregut anlage in statu nascendi	67	1492	0.623	7.3e-05	1012h	FBbt:00005423_1012h	ATAC_cat_distal
FBbt:00005536	stomatogastric nervous system primordium	42	1042	0.557	8.2e-05	1012h	FBbt:00005536_1012h	ATAC_cat_distal
FBbt:00000104	mesoderm anlage	77	1650	0.648	0.000108	1012h	FBbt:00000104_1012h	ATAC_cat_distal
FBbt:00005606	embryonic foregut	252	4514	0.779	0.000124	1012h	FBbt:00005606_1012h	ATAC_cat_distal
FBbt:00001333	procephalic neuroblast	57	1291	0.612	0.000137	1012h	FBbt:00001333_1012h	ATAC_cat_distal
FBbt:00017000	amnioserosa primordium	49	1147	0.592	0.00014	1012h	FBbt:00017000_1012h	ATAC_cat_distal
FBbt:00005552	ventral sensory complex primordium	89	1835	0.675	0.000197	1012h	FBbt:00005552_1012h	ATAC_cat_distal
FBbt:00001069	embryonic stomatogastric nervous system	44	1038	0.588	0.000278	1012h	FBbt:00001069_1012h	ATAC_cat_distal
FBbt:00000095	amnioserosa	130	2493	0.728	0.000311	1012h	FBbt:00000095_1012h	ATAC_cat_distal
FBbt:00005424	hindgut anlage in statu nascendi	64	1382	0.644	0.000341	1012h	FBbt:00005424_1012h	ATAC_cat_distal
FBbt:00005427	ectoderm anlage	74	1551	0.664	0.000404	1012h	FBbt:00005427_1012h	ATAC_cat_distal
FBbt:00005526	dorsal epidermis primordium	402	6773	0.829	0.000406	1012h	FBbt:00005526_1012h	ATAC_cat_distal
FBbt:00005431	foregut anlage	94	1873	0.7	0.000552	1012h	FBbt:00005431_1012h	ATAC_cat_distal
FBbt:00000128	trunk mesoderm	394	6614	0.833	0.000622	1012h	FBbt:00000128_1012h	ATAC_cat_distal
FBbt:00005665	embryonic central brain neuron	174	3161	0.77	0.000776	1012h	FBbt:00005665_1012h	ATAC_cat_distal
FBbt:00001102	ventral nerve cord	765	12186	0.876	0.000976	1012h	FBbt:00001102_1012h	ATAC_cat_distal
FBbt:00000092	pole cell	88	890	1.474	0.00112	1012h	FBbt:00000092_1012h	ATAC_cat_distal
FBbt:00005630	embryonic hindgut	413	6849	0.844	0.001184	1012h	FBbt:00005630_1012h	ATAC_cat_distal
FBbt:00001433	embryonic ganglion mother cell	12	387	0.426	0.001295	1012h	FBbt:00001433_1012h	ATAC_cat_distal
FBbt:00005640	embryonic main segment of Malpighian tubule	2	160	0.169	0.001561	1012h	FBbt:00005640_1012h	ATAC_cat_distal
FBbt:00005037	tracheal primordium	152	2766	0.77	0.001562	1012h	FBbt:00005037_1012h	ATAC_cat_distal
FBbt:00005744	embryonic dorsal epidermis	587	9470	0.867	0.001571	1012h	FBbt:00005744_1012h	ATAC_cat_distal
FBbt:00004860	germline cell	79	796	1.479	0.001594	1012h	FBbt:00004860_1012h	ATAC_cat_distal
FBbt:00007281	epiphysis	84	855	1.463	0.001809	1012h	FBbt:00007281_1012h	ATAC_cat_distal
FBbt:00005617	labral sensory complex	84	855	1.463	0.001809	1012h	FBbt:00005617_1012h	ATAC_cat_distal
FBbt:00017017	amnioserosa anlage	51	1094	0.649	0.001822	1012h	FBbt:00017017_1012h	ATAC_cat_distal
FBbt:00005747	embryonic ventral epidermis	488	7936	0.862	0.002205	1012h	FBbt:00005747_1012h	ATAC_cat_distal
FBbt:00005498	dorsal pharyngeal muscle primordium	40	894	0.622	0.002303	1012h	FBbt:00005498_1012h	ATAC_cat_distal
FBbt:00000210	anterior endoderm anlage	202	3521	0.805	0.002814	1012h	FBbt:00000210_1012h	ATAC_cat_distal
FBbt:00005672	lateral cord	25	614	0.565	0.003144	1012h	FBbt:00005672_1012h	ATAC_cat_distal
FBbt:00000441	hindgut proper primordium	344	5715	0.845	0.003159	1012h	FBbt:00000441_1012h	ATAC_cat_distal
FBbt:00005631	embryonic small intestine	22	556	0.548	0.003354	1012h	FBbt:00005631_1012h	ATAC_cat_distal
FBbt:00001685	plasmatocyte	47	438	1.611	0.003358	1012h	FBbt:00001685_1012h	ATAC_cat_distal
FBbt:00005741	embryonic head epidermis	373	6121	0.856	0.0046	1012h	FBbt:00005741_1012h	ATAC_cat_distal
FBbt:00005643	embryonic Malpighian tubule tip cell	7	247	0.389	0.007959	1012h	FBbt:00005643_1012h	ATAC_cat_distal
FBbt:00005541	cardiogenic mesoderm	40	846	0.66	0.008026	1012h	FBbt:00005541_1012h	ATAC_cat_distal
FBbt:00005828	embryonic head sensory system	219	3711	0.83	0.008086	1012h	FBbt:00005828_1012h	ATAC_cat_distal
FBbt:00017008	longitudinal visceral muscle primordium	54	1088	0.694	0.008155	1012h	FBbt:00017008_1012h	ATAC_cat_distal
FBbt:00005633	embryonic rectum	33	726	0.634	0.008218	1012h	FBbt:00005633_1012h	ATAC_cat_distal
FBbt:00001694	embryonic/larval oenocyte	26	600	0.603	0.009704	1012h	FBbt:00001694_1012h	ATAC_cat_distal
NA	NA	NA	NA	NA	NA	NA	NA	NA
noCat	unclassified	2433	35327	1.294	0	24h	noCat_24h	ATAC_cat_distal
FBbt:00000155	embryonic head	109	2646	0.601	0	24h	FBbt:00000155_24h	ATAC_cat_distal
FBbt:00005304	blastoderm embryo	13	569	0.332	5e-06	24h	FBbt:00005304_24h	ATAC_cat_distal
FBbt:00005785	anal pad	4	333	0.173	6e-06	24h	FBbt:00005785_24h	ATAC_cat_distal
FBbt:00005533	ventral epidermis primordium	90	2110	0.627	6e-06	24h	FBbt:00005533_24h	ATAC_cat_distal
FBbt:00005662	embryonic central brain	188	3728	0.745	9.2e-05	24h	FBbt:00005662_24h	ATAC_cat_distal
FBbt:00005526	dorsal epidermis primordium	51	1264	0.595	0.000133	24h	FBbt:00005526_24h	ATAC_cat_distal
FBbt:01005747	embryonic ventral trunk epidermis	31	865	0.527	0.000167	24h	FBbt:01005747_24h	ATAC_cat_distal
FBbt:0000632	embryonic lateral epidermis	56	1341	0.617	0.000208	24h	FBbt:0000632_24h	ATAC_cat_distal
FBbt:00000128	trunk mesoderm	23	676	0.5	0.000518	24h	FBbt:00000128_24h	ATAC_cat_distal
FBbt:0000610	early embryonic segmentation	27	740	0.538	0.000715	24h	FBbt:0000610_24h	ATAC_cat_distal
FBbt:00000092	pole cell	4	8	14.334	0.001025	24h	FBbt:00000092_24h	ATAC_cat_distal
FBbt:00005542	central brain primordium	137	2706	0.752	0.001153	24h	FBbt:00005542_24h	ATAC_cat_distal
FBbt:00005744	embryonic dorsal epidermis	28	738	0.561	0.001547	24h	FBbt:00005744_24h	ATAC_cat_distal
FBbt:00002655	dorsal organ	5	16	6.517	0.002809	24h	FBbt:00002655_24h	ATAC_cat_distal
FBbt:00005747	embryonic ventral epidermis	36	859	0.622	0.004142	24h	FBbt:00005747_24h	ATAC_cat_distal
FBbt:00000185	embryonic/larval tracheal system	9	320	0.413	0.004282	24h	FBbt:00000185_24h	ATAC_cat_distal
FBbt:00005741	embryonic head epidermis	26	665	0.579	0.004309	24h	FBbt:00005741_24h	ATAC_cat_distal
FBbt:00015254	ventral head epidermis	9	315	0.419	0.005647	24h	FBbt:00015254_24h	ATAC_cat_distal
FBbt:00005024	tracheal system	8	293	0.4	0.005907	24h	FBbt:00005024_24h	ATAC_cat_distal
FBbt:00005519	visceral muscle primordium	5	221	0.33	0.005964	24h	FBbt:00005519_24h	ATAC_cat_distal
FBbt:00001102	ventral nerve cord	198	3626	0.815	0.006298	24h	FBbt:00001102_24h	ATAC_cat_distal
FBbt:00005427	ectoderm anlage	1	114	0.126	0.007075	24h	FBbt:00005427_24h	ATAC_cat_distal
FBbt:00000442	Malpighian tubule primordium	5	216	0.338	0.008105	24h	FBbt:00000442_24h	ATAC_cat_distal
FBbt:00001082	embryonic ventral nervous system	6	241	0.364	0.008233	24h	FBbt:00001082_24h	ATAC_cat_distal
FBbt:00000111	ectoderm	15	422	0.525	0.00986	24h	FBbt:00000111_24h	ATAC_cat_distal
noCat	unclassified	4099	45888	1.263	0	68h	noCat_68h	ATAC_cat_distal
FBbt:00001727	larva	11	20	13.144	0	68h	FBbt:00001727_68h	ATAC_cat_distal
FBbt:00005542	central brain primordium	209	3319	0.709	1e-06	68h	FBbt:00005542_68h	ATAC_cat_distal
FBbt:00005662	embryonic central brain	326	4770	0.773	8e-06	68h	FBbt:00005662_68h	ATAC_cat_distal
FBbt:00015254	ventral head epidermis	11	377	0.321	1.7e-05	68h	FBbt:00015254_68h	ATAC_cat_distal
FBbt:00005541	cardiogenic mesoderm	6	265	0.248	3.7e-05	68h	FBbt:00005541_68h	ATAC_cat_distal
FBbt:00015246	dorsal head epidermis	9	316	0.313	6.7e-05	68h	FBbt:00015246_68h	ATAC_cat_distal
FBbt:00015256	central brain anlage	145	2260	0.728	0.000166	68h	FBbt:00015256_68h	ATAC_cat_distal
FBbt:00001673	embryonic/larval dorsal vessel	13	364	0.396	0.000223	68h	FBbt:00001673_68h	ATAC_cat_distal
FBbt:00004211	photoreceptor cell	9	27	5.374	0.000266	68h	FBbt:00004211_68h	ATAC_cat_distal
FBbt:00015248	dorsal head epidermis anlage	82	1370	0.678	0.000419	68h	FBbt:00015248_68h	ATAC_cat_distal
FBbt:00005434	visual anlage	74	1255	0.668	0.000501	68h	FBbt:00005434_68h	ATAC_cat_distal
FBbt:00004204	ventral ectoderm anlage	71	1206	0.667	0.000688	68h	FBbt:00004204_68h	ATAC_cat_distal
FBbt:00015253	antennal anlage	74	1243	0.675	0.000693	68h	FBbt:00015253_68h	ATAC_cat_distal
FBbt:01005747	embryonic ventral trunk epidermis	61	1051	0.657	0.000988	68h	FBbt:01005747_68h	ATAC_cat_distal
FBbt:00001102	ventral nerve cord	339	4669	0.829	0.001159	68h	FBbt:00001102_68h	ATAC_cat_distal
FBbt:00002655	dorsal organ	7	21	5.372	0.001293	68h	FBbt:00002655_68h	ATAC_cat_distal
FBbt:00001668	embryonic/larval lymph gland	2	130	0.167	0.001414	68h	FBbt:00001668_68h	ATAC_cat_distal
FBbt:00000128	trunk mesoderm	44	797	0.624	0.001696	68h	FBbt:00000128_68h	ATAC_cat_distal
FBbt:00001665	dorsal vessel primordium	2	126	0.173	0.002035	68h	FBbt:00001665_68h	ATAC_cat_distal
FBbt:00005304	blastoderm embryo	26	522	0.56	0.002659	68h	FBbt:00005304_68h	ATAC_cat_distal
FBbt:00025990	ectoderm derivative	4	8	10.74	0.002786	68h	FBbt:00025990_68h	ATAC_cat_distal
FBbt:01000122	posterior ectoderm anlage	44	330	1.657	0.002912	68h	FBbt:01000122_68h	ATAC_cat_distal
FBbt:00005554	ventral nerve cord primordium	266	3675	0.829	0.003759	68h	FBbt:00005554_68h	ATAC_cat_distal
FBbt:00000127	head mesoderm	8	231	0.384	0.004201	68h	FBbt:00000127_68h	ATAC_cat_distal
FBbt:00005427	ectoderm anlage	2	111	0.197	0.00585	68h	FBbt:00005427_68h	ATAC_cat_distal
FBbt:00015255	ventral head epidermis primordium	32	590	0.613	0.005936	68h	FBbt:00015255_68h	ATAC_cat_distal
FBbt:0000610	early embryonic segmentation	42	728	0.654	0.006085	68h	FBbt:0000610_68h	ATAC_cat_distal
FBbt:00005630	embryonic hindgut	28	519	0.61	0.008958	68h	FBbt:00005630_68h	ATAC_cat_distal
FBbt:00005533	ventral epidermis primordium	105	2388	0.606	0	1012h	FBbt:00005533_1012h	ATAC_cat_distal
FBbt:0000610	early embryonic segmentation	15	643	0.317	0	1012h	FBbt:0000610_1012h	ATAC_cat_distal
noCat	unclassified	4090	56644	1.207	0	1012h	noCat_1012h	ATAC_cat_distal
FBbt:00004204	ventral ectoderm anlage	32	996	0.44	0	1012h	FBbt:00004204_1012h	ATAC_cat_distal
FBbt:00005526	dorsal epidermis primordium	56	1430	0.539	1e-06	1012h	FBbt:00005526_1012h	ATAC_cat_distal
FBbt:00000155	embryonic head	177	3502	0.7	3e-06	1012h	FBbt:00000155_1012h	ATAC_cat_distal
FBbt:00014203	lateral head epidermis primordium	14	547	0.349	7e-06	1012h	FBbt:00014203_1012h	ATAC_cat_distal
FBbt:00005662	embryonic central brain	306	5503	0.773	1.3e-05	1012h	FBbt:00005662_1012h	ATAC_cat_distal
FBbt:00005542	central brain primordium	187	3543	0.734	3.1e-05	1012h	FBbt:00005542_1012h	ATAC_cat_distal
FBbt:00001102	ventral nerve cord	311	5522	0.784	3.7e-05	1012h	FBbt:00001102_1012h	ATAC_cat_distal
FBbt:0000632	embryonic lateral epidermis	80	1734	0.64	4.8e-05	1012h	FBbt:0000632_1012h	ATAC_cat_distal
FBbt:00015248	dorsal head epidermis anlage	50	1192	0.581	7.1e-05	1012h	FBbt:00015248_1012h	ATAC_cat_distal
FBbt:00000092	pole cell	5	8	22.278	7.7e-05	1012h	FBbt:00000092_1012h	ATAC_cat_distal
FBbt:00015255	ventral head epidermis primordium	17	554	0.421	0.000103	1012h	FBbt:00015255_1012h	ATAC_cat_distal
FBbt:00015254	ventral head epidermis	10	396	0.345	0.000145	1012h	FBbt:00015254_1012h	ATAC_cat_distal
FBbt:00005434	visual anlage	46	1088	0.586	0.000189	1012h	FBbt:00005434_1012h	ATAC_cat_distal
FBbt:00015253	antennal anlage	46	1078	0.592	0.000228	1012h	FBbt:00015253_1012h	ATAC_cat_distal
FBbt:00105220	lateral head epidermis	12	426	0.386	0.000256	1012h	FBbt:00105220_1012h	ATAC_cat_distal
FBbt:00015256	central brain anlage	104	2066	0.702	0.000317	1012h	FBbt:00015256_1012h	ATAC_cat_distal
FBbt:00005415	central brain anlage in statu nascendi	31	791	0.542	0.00033	1012h	FBbt:00005415_1012h	ATAC_cat_distal
FBbt:00005744	embryonic dorsal epidermis	43	1011	0.59	0.000373	1012h	FBbt:00005744_1012h	ATAC_cat_distal
FBbt:00005519	visceral muscle primordium	6	284	0.287	0.000394	1012h	FBbt:00005519_1012h	ATAC_cat_distal
FBbt:00005425	visual anlage in statu nascendi	31	785	0.546	0.000409	1012h	FBbt:00005425_1012h	ATAC_cat_distal
FBbt:00005747	embryonic ventral epidermis	51	1145	0.619	0.000435	1012h	FBbt:00005747_1012h	ATAC_cat_distal
FBbt:00015246	dorsal head epidermis	8	324	0.337	0.000605	1012h	FBbt:00015246_1012h	ATAC_cat_distal
FBbt:00015249	dorsal head epidermis anlage in statu nascendi	31	778	0.551	0.000639	1012h	FBbt:00015249_1012h	ATAC_cat_distal
FBbt:00015252	antennal anlage in statu nascendi	31	778	0.551	0.000639	1012h	FBbt:00015252_1012h	ATAC_cat_distal
FBbt:00005554	ventral nerve cord primordium	229	4023	0.797	0.000913	1012h	FBbt:00005554_1012h	ATAC_cat_distal
FBbt:01005747	embryonic ventral trunk epidermis	57	1219	0.651	0.000984	1012h	FBbt:01005747_1012h	ATAC_cat_distal
FBbt:00005428	dorsal ectoderm anlage	25	647	0.534	0.001072	1012h	FBbt:00005428_1012h	ATAC_cat_distal
FBbt:00005558	ventral ectoderm	2	168	0.161	0.001138	1012h	FBbt:00005558_1012h	ATAC_cat_distal
FBbt:00000104	mesoderm anlage	22	579	0.525	0.001746	1012h	FBbt:00000104_1012h	ATAC_cat_distal
FBbt:00001673	embryonic/larval dorsal vessel	11	358	0.422	0.002339	1012h	FBbt:00001673_1012h	ATAC_cat_distal
FBbt:00015247	dorsal head epidermis primordium	7	250	0.384	0.005907	1012h	FBbt:00015247_1012h	ATAC_cat_distal
FBbt:00005785	anal pad	20	501	0.553	0.00623	1012h	FBbt:00005785_1012h	ATAC_cat_distal
FBbt:00005304	blastoderm embryo	14	386	0.501	0.00668	1012h	FBbt:00005304_1012h	ATAC_cat_distal
NA	NA	NA	NA	NA	NA	NA	NA	NA
EF:0008	ectoderm	318	6583	0.695	0	24h	EF:0008_24h	ATAC_cat_distal
noCat	unclassified	2433	35327	1.294	0	24h	noCat_24h	ATAC_cat_distal
EF:expressed	organism	137	3017	0.666	2e-06	24h	EF:expressed_24h	ATAC_cat_distal
EF:0004	blastoderm	57	1461	0.573	1.2e-05	24h	EF:0004_24h	ATAC_cat_distal
EF:0009	nervous_system	306	5782	0.778	3.3e-05	24h	EF:0009_24h	ATAC_cat_distal
EF:0005	mesoderm_derivatives	120	2567	0.69	5.5e-05	24h	EF:0005_24h	ATAC_cat_distal
EF:0011	trachael_system	28	812	0.507	0.000136	24h	EF:0011_24h	ATAC_cat_distal
EF:0007	gut	206	3870	0.791	0.001241	24h	EF:0007_24h	ATAC_cat_distal
noCat	unclassified	4099	45888	1.263	0	68h	noCat_68h	ATAC_cat_distal
EF:0008	ectoderm	560	8163	0.765	0	68h	EF:0008_68h	ATAC_cat_distal
EF:0009	nervous_system	510	7244	0.792	1e-06	68h	EF:0009_68h	ATAC_cat_distal
EF:0004	blastoderm	91	1500	0.688	0.000365	68h	EF:0004_68h	ATAC_cat_distal
EF:0011	trachael_system	56	1009	0.627	0.000408	68h	EF:0011_68h	ATAC_cat_distal
EF:0005	mesoderm_derivatives	220	3105	0.81	0.002958	68h	EF:0005_68h	ATAC_cat_distal
EF:0008	ectoderm	459	8535	0.735	0	1012h	EF:0008_1012h	ATAC_cat_distal
noCat	unclassified	4090	56644	1.207	0	1012h	noCat_1012h	ATAC_cat_distal
EF:0004	blastoderm	48	1296	0.509	1e-06	1012h	EF:0004_1012h	ATAC_cat_distal
EF:0009	nervous_system	454	7841	0.803	1e-05	1012h	EF:0009_1012h	ATAC_cat_distal
EF:expressed	organism	217	3929	0.771	0.000184	1012h	EF:expressed_1012h	ATAC_cat_distal
EF:0005	mesoderm_derivatives	168	3083	0.762	0.000585	1012h	EF:0005_1012h	ATAC_cat_distal
EF:0003	gonad_pole_cells	12	65	3.028	0.001617	1012h	EF:0003_1012h	ATAC_cat_distal
NA	NA	NA	NA	NA	NA	NA	NA	NA
FBdv:00004450	stage11-12	1052	18142	0.819	0	24h	FBdv:00004450_24h	ATAC_cat_distal
FBdv:00014201	stage9-10	929	16084	0.824	1e-06	24h	FBdv:00014201_24h	ATAC_cat_distal
FBdv:00005331	stage13-16	1192	19733	0.869	0.00025	24h	FBdv:00005331_24h	ATAC_cat_distal
FBdv:00005304	stage4-6	939	15786	0.863	0.000267	24h	FBdv:00005304_24h	ATAC_cat_distal
FBdv:00005319	stage7-8	881	14687	0.878	0.00164	24h	FBdv:00005319_24h	ATAC_cat_distal
noCat	unclassified	1731	25398	1.109	0.006339	24h	noCat_24h	ATAC_cat_distal
FBdv:00014201	stage9-10	1538	20232	0.833	0	68h	FBdv:00014201_68h	ATAC_cat_distal
FBdv:00004450	stage11-12	1803	23262	0.849	0	68h	FBdv:00004450_68h	ATAC_cat_distal
FBdv:00005319	stage7-8	1383	18191	0.84	0	68h	FBdv:00005319_68h	ATAC_cat_distal
FBdv:00005304	stage4-6	1513	19563	0.858	1e-06	68h	FBdv:00005304_68h	ATAC_cat_distal
FBdv:00005331	stage13-16	2026	25360	0.887	6.2e-05	68h	FBdv:00005331_68h	ATAC_cat_distal
noCat	unclassified	2922	32984	1.1	0.001188	68h	noCat_68h	ATAC_cat_distal
FBdv:00004450	stage11-12	1668	26244	0.86	1e-06	1012h	FBdv:00004450_1012h	ATAC_cat_distal
FBdv:00014201	stage9-10	1394	22087	0.861	4e-06	1012h	FBdv:00014201_1012h	ATAC_cat_distal
FBdv:00005319	stage7-8	1259	19870	0.871	3.8e-05	1012h	FBdv:00005319_1012h	ATAC_cat_distal
FBdv:00005331	stage13-16	1964	29873	0.901	0.000523	1012h	FBdv:00005331_1012h	ATAC_cat_distal
FBdv:00005304	stage4-6	1423	21734	0.91	0.003756	1012h	FBdv:00005304_1012h	ATAC_cat_distal
noCat	unclassified	2898	40326	1.08	0.009351	1012h	noCat_1012h	ATAC_cat_distal
NA	NA	NA	NA	NA	NA	NA	NA	NA
PC00171	nucleic acid binding	410	10819	0.638	0	24h	PC00171_24h	ATAC_cat_proximal
PC00218	transcription factor	261	6799	0.672	0	24h	PC00218_24h	ATAC_cat_proximal
PC00000	protein class	1536	31324	0.776	0	24h	PC00000_24h	ATAC_cat_proximal
PC00031	RNA binding protein	181	4921	0.65	0	24h	PC00031_24h	ATAC_cat_proximal
noCat	unclassified	659	10314	1.28	0	24h	noCat_24h	ATAC_cat_proximal
PC00113	guanyl-nucleotide exchange factor	61	584	2.089	1e-06	24h	PC00113_24h	ATAC_cat_proximal
PC00214	tight junction	19	105	3.929	3e-06	24h	PC00214_24h	ATAC_cat_proximal
PC00177	oxygenase	36	322	2.244	3.1e-05	24h	PC00177_24h	ATAC_cat_proximal
PC00202	ribosomal protein	34	1178	0.519	5.8e-05	24h	PC00202_24h	ATAC_cat_proximal
PC00022	G-protein modulator	109	1393	1.524	8.1e-05	24h	PC00022_24h	ATAC_cat_proximal
PC00070	cell junction protein	49	512	1.889	9.9e-05	24h	PC00070_24h	ATAC_cat_proximal
PC00244	zinc finger transcription factor	86	2349	0.661	0.000111	24h	PC00244_24h	ATAC_cat_proximal
PC00020	G-protein	16	693	0.414	0.000115	24h	PC00020_24h	ATAC_cat_proximal
PC00170	nuclease	28	998	0.505	0.000116	24h	PC00170_24h	ATAC_cat_proximal
PC00009	DNA binding protein	151	3738	0.728	0.000129	24h	PC00009_24h	ATAC_cat_proximal
PC00224	translation initiation factor	10	484	0.371	0.000495	24h	PC00224_24h	ATAC_cat_proximal
PC00085	cytoskeletal protein	122	3030	0.729	0.000613	24h	PC00085_24h	ATAC_cat_proximal
PC00235	vesicle coat protein	0	125	0	0.002088	24h	PC00235_24h	ATAC_cat_proximal
PC00119	homeobox transcription factor	27	869	0.562	0.002237	24h	PC00119_24h	ATAC_cat_proximal
PC00116	helix-turn-helix transcription factor	27	869	0.562	0.002237	24h	PC00116_24h	ATAC_cat_proximal
PC00201	ribonucleoprotein	21	713	0.533	0.002472	24h	PC00201_24h	ATAC_cat_proximal
PC00150	membrane traffic protein	40	1157	0.627	0.002842	24h	PC00150_24h	ATAC_cat_proximal
PC00077	chromatin/chromatin-binding protein	31	940	0.598	0.003335	24h	PC00077_24h	ATAC_cat_proximal
PC00137	kinase	106	2572	0.75	0.00389	24h	PC00137_24h	ATAC_cat_proximal
PC00121	hydrolase	266	5815	0.83	0.004621	24h	PC00121_24h	ATAC_cat_proximal
PC00157	microtubule family cytoskeletal protein	25	777	0.584	0.006101	24h	PC00157_24h	ATAC_cat_proximal
PC00220	transferase	264	5725	0.838	0.007736	24h	PC00220_24h	ATAC_cat_proximal
PC00171	nucleic acid binding	508	11881	0.592	0	68h	PC00171_68h	ATAC_cat_proximal
PC00031	RNA binding protein	213	5307	0.585	0	68h	PC00031_68h	ATAC_cat_proximal
PC00218	transcription factor	349	7583	0.671	0	68h	PC00218_68h	ATAC_cat_proximal
PC00000	protein class	2069	35027	0.788	0	68h	PC00000_68h	ATAC_cat_proximal
noCat	unclassified	881	11556	1.278	0	68h	noCat_68h	ATAC_cat_proximal
PC00170	nuclease	30	1116	0.398	0	68h	PC00170_68h	ATAC_cat_proximal
PC00202	ribosomal protein	36	1242	0.43	0	68h	PC00202_68h	ATAC_cat_proximal
PC00113	guanyl-nucleotide exchange factor	79	647	2.057	0	68h	PC00113_68h	ATAC_cat_proximal
PC00009	DNA binding protein	183	4077	0.669	0	68h	PC00009_68h	ATAC_cat_proximal
PC00244	zinc finger transcription factor	114	2640	0.648	3e-06	68h	PC00244_68h	ATAC_cat_proximal
PC00214	tight junction	21	108	3.542	4e-06	68h	PC00214_68h	ATAC_cat_proximal
PC00077	chromatin/chromatin-binding protein	35	1016	0.516	3.2e-05	68h	PC00077_68h	ATAC_cat_proximal
PC00223	translation factor	25	802	0.466	4.2e-05	68h	PC00223_68h	ATAC_cat_proximal
PC00224	translation initiation factor	14	542	0.385	6.4e-05	68h	PC00224_68h	ATAC_cat_proximal
PC00142	ligase	111	2409	0.696	0.000146	68h	PC00142_68h	ATAC_cat_proximal
PC00029	KRAB box transcription factor	24	737	0.488	0.000189	68h	PC00029_68h	ATAC_cat_proximal
PC00070	cell junction protein	57	547	1.711	0.000301	68h	PC00070_68h	ATAC_cat_proximal
PC00020	G-protein	27	773	0.525	0.000473	68h	PC00020_68h	ATAC_cat_proximal
PC00099	exoribonuclease	2	190	0.155	0.000547	68h	PC00099_68h	ATAC_cat_proximal
PC00121	hydrolase	353	6489	0.822	0.000586	68h	PC00121_68h	ATAC_cat_proximal
PC00116	helix-turn-helix transcription factor	38	981	0.584	0.000602	68h	PC00116_68h	ATAC_cat_proximal
PC00119	homeobox transcription factor	38	981	0.584	0.000602	68h	PC00119_68h	ATAC_cat_proximal
PC00047	aminoacyl-tRNA synthetase	4	226	0.262	0.00161	68h	PC00047_68h	ATAC_cat_proximal
PC00117	heterotrimeric G-protein	0	103	0	0.001936	68h	PC00117_68h	ATAC_cat_proximal
PC00022	G-protein modulator	129	1543	1.346	0.002171	68h	PC00022_68h	ATAC_cat_proximal
PC00174	nucleotidyltransferase	12	409	0.44	0.00223	68h	PC00174_68h	ATAC_cat_proximal
PC00055	basic helix-loop-helix transcription factor	11	385	0.428	0.002333	68h	PC00055_68h	ATAC_cat_proximal
PC00217	transcription cofactor	40	951	0.637	0.00398	68h	PC00217_68h	ATAC_cat_proximal
PC00081	cysteine protease	14	434	0.485	0.004184	68h	PC00081_68h	ATAC_cat_proximal
PC00138	kinase activator	10	345	0.434	0.005453	68h	PC00138_68h	ATAC_cat_proximal
PC00072	chaperone	33	803	0.622	0.005697	68h	PC00072_68h	ATAC_cat_proximal
PC00003	ATP-binding cassette (ABC) transporter	44	453	1.579	0.006639	68h	PC00003_68h	ATAC_cat_proximal
PC00188	potassium channel	2	140	0.211	0.008994	68h	PC00188_68h	ATAC_cat_proximal
PC00242	voltage-gated potassium channel	2	140	0.211	0.008994	68h	PC00242_68h	ATAC_cat_proximal
PC00235	vesicle coat protein	2	141	0.21	0.009016	68h	PC00235_68h	ATAC_cat_proximal
PC00171	nucleic acid binding	421	12134	0.6	0	1012h	PC00171_1012h	ATAC_cat_proximal
PC00218	transcription factor	281	7806	0.648	0	1012h	PC00218_1012h	ATAC_cat_proximal
PC00177	oxygenase	58	441	2.795	0	1012h	PC00177_1012h	ATAC_cat_proximal
PC00214	tight junction	23	106	5.082	0	1012h	PC00214_1012h	ATAC_cat_proximal
PC00009	DNA binding protein	140	4133	0.622	0	1012h	PC00009_1012h	ATAC_cat_proximal
PC00031	RNA binding protein	198	5439	0.667	0	1012h	PC00031_1012h	ATAC_cat_proximal
PC00244	zinc finger transcription factor	90	2704	0.616	2e-06	1012h	PC00244_1012h	ATAC_cat_proximal
PC00170	nuclease	27	1130	0.441	3e-06	1012h	PC00170_1012h	ATAC_cat_proximal
PC00000	protein class	1862	38109	0.836	3e-06	1012h	PC00000_1012h	ATAC_cat_proximal
PC00020	G-protein	16	801	0.368	6e-06	1012h	PC00020_1012h	ATAC_cat_proximal
PC00202	ribosomal protein	35	1278	0.508	1.8e-05	1012h	PC00202_1012h	ATAC_cat_proximal
PC00224	translation initiation factor	9	544	0.305	3.7e-05	1012h	PC00224_1012h	ATAC_cat_proximal
PC00014	DNA photolyase	5	11	15.213	0.000135	1012h	PC00014_1012h	ATAC_cat_proximal
PC00197	receptor	296	4605	1.279	0.000141	1012h	PC00197_1012h	ATAC_cat_proximal
PC00090	defense/immunity protein	93	1201	1.547	0.00017	1012h	PC00090_1012h	ATAC_cat_proximal
PC00116	helix-turn-helix transcription factor	27	978	0.513	0.000261	1012h	PC00116_1012h	ATAC_cat_proximal
PC00119	homeobox transcription factor	27	978	0.513	0.000261	1012h	PC00119_1012h	ATAC_cat_proximal
PC00070	cell junction protein	51	590	1.737	0.000504	1012h	PC00070_1012h	ATAC_cat_proximal
PC00113	guanyl-nucleotide exchange factor	57	707	1.61	0.001145	1012h	PC00113_1012h	ATAC_cat_proximal
PC00122	hydroxylase	18	150	2.494	0.001164	1012h	PC00122_1012h	ATAC_cat_proximal
PC00157	microtubule family cytoskeletal protein	25	870	0.535	0.001166	1012h	PC00157_1012h	ATAC_cat_proximal
PC00003	ATP-binding cassette (ABC) transporter	44	520	1.695	0.001927	1012h	PC00003_1012h	ATAC_cat_proximal
PC00101	extracellular matrix linker protein	37	423	1.756	0.001995	1012h	PC00101_1012h	ATAC_cat_proximal
PC00115	helicase	18	657	0.511	0.002578	1012h	PC00115_1012h	ATAC_cat_proximal
PC00077	chromatin/chromatin-binding protein	32	998	0.6	0.0031	1012h	PC00077_1012h	ATAC_cat_proximal
PC00099	exoribonuclease	2	199	0.185	0.003427	1012h	PC00099_1012h	ATAC_cat_proximal
PC00217	transcription cofactor	32	988	0.606	0.003753	1012h	PC00217_1012h	ATAC_cat_proximal
PC00176	oxidoreductase	222	3555	1.231	0.004971	1012h	PC00176_1012h	ATAC_cat_proximal
PC00208	small GTPase	12	474	0.471	0.006552	1012h	PC00208_1012h	ATAC_cat_proximal
[truncated: 14,838 more rows]
