# Supplementary material for: Cis -acting variation is common across regulatory layers but is often buffered during embryonic development
Source: HighWire-hosted journal article supplement (doi:10.1101/gr.266338.120), 2020-12-11
Supplement: SupplementalTables.zip [file Supplemental_Table_S7.xlsx]

## Sheet: README
Supplemental Table S7: Model contrast data comparing the significance of line and time effects in different sets of genes/features (see Main Text and Methods).

## Sheet: Sheet1
Model referenced:	M1: Time + Line	M2: Time	M3: Line	M4: Interaction Time x Line
Total count data no M4							Proportion of tested features significant for each model
mark	M1	M2	M3		total		M1_prop	M2_prop	M3_prop
K27	324	2532	1073		3929		0.0824637	0.644439	0.273097
K4	154	804	284		1242		0.123994	0.647343	0.228663
RNA	33	69	4		106		0.311321	0.650943	0.0377358
ATAC	1111	2349	289		3749		0.296346	0.626567	0.0770872
Total count data
mark	M1	M2	M3	M4	total		M1_prop	M2_prop	M3_prop	M4_prop
K27	285	2360	992	55	3692		0.0771939	0.63922	0.268689	0.0148971
K4	133	732	258	37	1160		0.114655	0.631034	0.222414	0.0318966
RNA	22	51	3	30	106		0.207547	0.481132	0.0283019	0.283019
ATAC	881	2037	251	360	3529		0.249646	0.577217	0.071125	0.102012
AI_no_M4
mark	M1	M2	M3		total		M1_prop	M2_prop	M3_prop
K27	42	1461	1960		3463		0.0121282	0.421889	0.565983
K4	12	517	605		1134		0.010582	0.455908	0.53351
RNA	3	56	21		80		0.0375	0.7	0.2625
ATAC	15	2628	379		3022		0.0049636	0.869623	0.125414
AI
mark	M1	M2	M3	M4	total		M1_prop	M2_prop	M3_prop	M4_prop
K27	36	1454	1958	59	3507		0.0102652	0.414599	0.558312	0.0168235
K4	11	522	600	19	1152		0.00954861	0.453125	0.520833	0.0164931
RNA	1	55	20	4	80		0.0125	0.6875	0.25	0.05
ATAC	14	2635	386	3	3038		0.00460829	0.867347	0.127057	0.000987492
AI proximal distal model contrasts
K27	M1	M2	M3		total		M1_prop	M2_prop	M3_prop
Distal	101	1205	660		1966		0.0513733	0.61292	0.335707
Proximal	223	1327	413		1963		0.113602	0.676006	0.210392
ATAC	M1	M2	M3		total		M1_prop	M2_prop	M3_prop
Distal	8	1054	172		1234		0.00648298	0.854133	0.139384
Proximal	7	1574	207		1788		0.00391499	0.880313	0.115772
Total count proximal distal model contrasts
K27	M1	M2	M3		total		M1_prop	M2_prop	M3_prop
Distal	28	798	996		1822		0.0153677	0.43798	0.546652
Proximal	14	663	964		1641		0.00853138	0.404022	0.587447
ATAC	M1	M2	M3		total		M1_prop	M2_prop	M3_prop
Distal	492	1092	105		1689		0.291297	0.646536	0.062167
Proximal	619	1257	177		2053		0.30151	0.612275	0.0862153
Total count proximal distal model contrasts interactions
ATAC	M1	M2	M3	M4	total		M1_prop	M2_prop	M3_prop	M4_prop
Distal	384	938	97	184	1603		0.239551	0.585153	0.0605115	0.114785
Proximal	497	1099	154	176	1926		0.258048	0.570613	0.0799585	0.0913811
K27	M1	M2	M3	M4	total		M1_prop	M2_prop	M3_prop	M4_prop
Distal	88	1127	612	27	1854		0.0474649	0.607875	0.330097	0.0145631
Proximal	197	1233	380	28	1838		0.107182	0.670838	0.206746	0.0152339
